# Supplementary material for: Tasks, multitasking and interruptions among the surgical team in an operating room: a prospective observational study
Source: PubMed Central journal article supplement — BMJ Open. 2019 May 15;9(5):e026410. doi: 10.1136/bmjopen-2018-026410 (PMC6530509; doi:10.1136/bmjopen-2018-026410), 2019-05-15
Supplement: bmjopen-2018-026410.draft_revisions.pdf [file bmjopen-2018-026410.draft_revisions.pdf]

# BMJ Open

BMJ Open is committed to open peer review. As part of this commitment we make the peer review history of every article we publish publicly available.

When an article is published we post the peer reviewers' comments and the authors' responses online. We also post the versions of the paper that were used during peer review. These are the versions that the peer review comments apply to.

The versions of the paper that follow are the versions that were submitted during the peer review process. They are not the versions of record or the final published versions. They should not be cited or distributed as the published version of this manuscript.

BMJ Open is an open access journal and the full, final, typeset and author-corrected version of record of the manuscript is available on our site with no access controls, subscription charges or pay-per-view fees (<http://bmjopen.bmj.com>).

If you have any questions on BMJ Open's open peer review process please email [editorial.bmjopen@bmj.com](mailto:editorial.bmjopen@bmj.com)

# BMJ Open

## Tasks, multitasking and interruptions among the surgical team in an operating room: a prospective observational study

|                               |                                                                                                                                                                                                                                                                                                                                                                                                                                                                                                                                                                                                                                                                                                                                                                                                                               |
|-------------------------------|-------------------------------------------------------------------------------------------------------------------------------------------------------------------------------------------------------------------------------------------------------------------------------------------------------------------------------------------------------------------------------------------------------------------------------------------------------------------------------------------------------------------------------------------------------------------------------------------------------------------------------------------------------------------------------------------------------------------------------------------------------------------------------------------------------------------------------|
| Journal:                      | <i>BMJ Open</i>                                                                                                                                                                                                                                                                                                                                                                                                                                                                                                                                                                                                                                                                                                                                                                                                               |
| Manuscript ID                 | bmjopen-2018-026410                                                                                                                                                                                                                                                                                                                                                                                                                                                                                                                                                                                                                                                                                                                                                                                                           |
| Article Type:                 | Research                                                                                                                                                                                                                                                                                                                                                                                                                                                                                                                                                                                                                                                                                                                                                                                                                      |
| Date Submitted by the Author: | 30-Aug-2018                                                                                                                                                                                                                                                                                                                                                                                                                                                                                                                                                                                                                                                                                                                                                                                                                   |
| Complete List of Authors:     | Göras, Camilla; Örebro Universitet Institutionen för Hälsoakademin och Medicin, School of health sciences<br>Olin, Karolina; Karolinska Institutet, Medical Management Centre, Dept of Learning, Informatics, Management and Ethics (LIME), Tomtebodavägen 18 A;; Turku University Hospital , Administration Centre<br>Unbeck, Maria; Karolinska Institutet Department of Molecular Medicine and Surgery<br>Nilsson, Ulrica; Örebro University, Sweden, Department of Health and Medical Sciences<br>Pukk Harenstam, Karin; Karolinska Universitetssjukhuset, Astrid Lindgren's Children's Hospital; Karolinska Institutet, Medical Management Centre, Dept. of Learning, Informatics, Management and Ethics (LIME)<br>Ehrenberg, Anna ; Dalarna University<br>Ekstedt, Mirjam; Karolinska Institutet, LIME; Linneuniversitet |
| Keywords:                     | Complexity, Multitasking, Interruptions, Patient Safety, Operating room, SURGERY                                                                                                                                                                                                                                                                                                                                                                                                                                                                                                                                                                                                                                                                                                                                              |
|                               |                                                                                                                                                                                                                                                                                                                                                                                                                                                                                                                                                                                                                                                                                                                                                                                                                               |

SCHOLARONE™  
Manuscripts

## Tasks, multitasking and interruptions among the surgical team in an operating room: a prospective observational study

Corresponding author: Karolina Olin [karolina.olin@ki.se](mailto:karolina.olin@ki.se) ; Medical Management Centre, LIME, Tomtebodavägen 18 A, 17177 Stockholm, Sweden, +358(0)400850513

Camilla Göras\*, RNA, MSc, PhD student<sup>1,2,3</sup>, Karolina Olin\*, RNA, MSc, PhD student<sup>4,5</sup>, Maria Unbeck, RN, PhD<sup>6,7</sup>, Ulrica Nilsson, RNA, Professor<sup>1</sup>, Karin Pukk-Härenstam MD PHD<sup>4,8</sup>, Anna Ehrenberg, RN, Professor<sup>9</sup>, Mirjam Ekstedt, RN, Professor<sup>4,10</sup>

<sup>1</sup> School of Health Sciences, Faculty of Medicine and Health, Örebro University, Örebro, Sweden

<sup>2</sup> Department of Anaesthesia and Intensive Care Unit, Falu Hospital, Falun, Sweden

<sup>3</sup> Centre for Clinical Research, Falun, Dalarna, Sweden

<sup>4</sup> Department of Learning, Informatics, Management and Ethics, Karolinska Institutet, Stockholm, Sweden

<sup>5</sup> Development Centre, Turku University Hospital, Turku, Finland

<sup>6</sup> Theme Trauma and Reparative Medicine, Karolinska University Hospital, Stockholm, Sweden

<sup>7</sup> Department of Molecular Medicine and Surgery, Karolinska Institutet, Stockholm, Sweden

<sup>8</sup> Paediatric Emergency Department, Karolinska University Hospital, Stockholm, Sweden

<sup>9</sup> School of Education, Health and Social Studies, Dalarna University, Falun, Sweden

<sup>10</sup> Department of Health and Caring Sciences, Linnaeus University, Kalmar/Växjö Sweden.

\*Camilla Göras and Karolina Olin contributed equally in the manuscript

### Email addresses and phone numbers:

CG: [camilla.goras@outlook.com](mailto:camilla.goras@outlook.com), +46(0)23492101

KO: [karolina.olin@ki.se](mailto:karolina.olin@ki.se), +358(0)400850513

MU: [maria.unbeck@sll.se](mailto:maria.unbeck@sll.se), +46(0)851770000

UN: [ulrica.nilsson@oru.se](mailto:ulrica.nilsson@oru.se), +46(0)19301051

KPH: [karin.pukk-harenstam@sll.se](mailto:karin.pukk-harenstam@sll.se), +46(0)708558896

AE: [aeh@du.se](mailto:aeh@du.se), +46(0)23778472

ME: [mirjam.ekstedt@ki.se](mailto:mirjam.ekstedt@ki.se), +46(0)703185691

Words: 4770 words (excluding: title page, abstract, references, figures and tables)

## ABSTRACT

**Objectives** The work context of the operating room is considered complex and dynamic with high cognitive demands. A multidimensional view of the complete pre- and intraoperative work process of the surgical team in the OR has been sparsely described. The aim of this study was to describe the type and frequency of tasks, multitasking and interruptions during surgical procedures among the surgical team in the OR.

**Design** Prospective observational study, using the Work Observation Method By Activity Timing (WOMBAT) tool.

**Setting** County hospital in Sweden, surgical department.

**Participants** Operating room nurses (ORNs) (n=10), registered nurse anesthetists (RNAs) (n=8) and surgeons (n=9).

**Results** The type, frequency and time spent on specific tasks, multitasking and interruptions were measured. From a multidimensional view, the surgical team performed almost 11,000 tasks (64 tasks per hour). Communication represented almost half (n=4968, 45.7%) of all observed tasks. Concerning task time, direct care dominated the surgeons' and ORNs' intra-operative time while in RNAs' work it was intra-indirect care. In total 48.2% of time was spent in multitasking and was most often observed in ORNs' and surgeons' work during communication. Among the total 426 interruptions measured, the largest proportion, 26.7%, was related to equipment. Interruptions were most commonly followed by professional communication.

**Conclusions** Communication was identified as a major component in the work process of the surgical team. The team constantly dealt with multitasking and interruptions, both with potential impact on patient safety and workflow. Interruptions were commonly followed by professional communication, which may reflect the interactions and constant adaptations in a complex adaptive system. Future research should focus on understanding the complexity of different work processes, and how teams meet the challenges of complex adaptive systems.

Words: 280

**Keywords:** Complexity, multitasking, interruptions, patient safety, operating room

**Ethical registration number**  
2016/264

## STRENGTHS AND LIMITATIONS OF THIS STUDY

- This study adds to the knowledge of how complex work is performed in the OR by providing a multidimensional view of the complete pre- and intraoperative work process of the surgical team.
- The data collection tool used, WOMBAT, employs a structured observation protocol with an objective definition of “interruption”, which may reduce the risk of potential measurement errors.
- Even though the assistant surgeon, anesthesiologist and the circulating nurse were observed indirectly when interacting with the observed ORN, RNA or surgeon, the nature of performed tasks and how often they were interrupted was not recorded, which may be considered a limitation, as the whole surgical team is not represented in this study.
- Some participants were also observed on several occasions, which may imply a potential risk for a systematic bias.
- This study was performed in one hospital only and the observations did not include night shifts, weekend shifts or procedures conducted on Fridays, which may limit the representativeness for different work shifts and may reduce the generalizability of the findings.

## BACKGROUND

Clinical work in surgery is often fast-paced, demanding and time- and resource-constrained. It requires specific technical and cognitive skills<sup>1</sup> and involves multiple activities such as organizing care, responding to patients' changing conditions, anticipating needs and performing surgical procedures.<sup>1</sup>

<sup>2</sup> An operating room (OR) can be considered a complex adaptive system (CAS),<sup>3</sup> where behaviors and team compositions alter and mutate and teams learn over time.<sup>4</sup> It is an interconnected and dynamic environment<sup>3</sup> with an inherent potential for distractions and interruptions.<sup>15</sup>

The members of the surgical team are essential actors in the OR,<sup>6</sup> focusing on performing safe surgical care. In addition, components such as suitable environment, functioning equipment, drugs and disposable items to support the intra-operative process are needed.<sup>7</sup> The work process of the surgical team in the OR is mainly described through the surgical procedure and its phases,<sup>8</sup> including sometimes also the phases of anesthesia.<sup>9</sup> The OR context contains considerable potential for interruptions that may interfere with the work of the surgical team.<sup>5 10</sup> Good outcomes are related to individuals' and teams' skills to adjust and adapt to unexpected events and rapidly changing situations, using communication and interaction, i.e. resilience.<sup>11 12</sup> To understand resilience requires deep understanding of the work as it is actually carried out, rather than how it is usually presented with standardized models.<sup>13</sup>

Multitasking has been defined as managing multiple tasks simultaneously,<sup>14 15 16</sup> or tasks completed in parallel.<sup>17 18</sup> Multitasking is a strategy often used by healthcare staff to manage interruptions and competing work demands.<sup>19</sup> Furthermore, it may also result in risk of increased loss of information,<sup>20</sup> reaction delay, prolonged duration of activity, increased workload and reduced quality of care.<sup>2</sup> For surgeons, multitasking increases completion time and length of procedure significantly.<sup>21</sup> Staff in the OR are expected to multitask by being accessible through pagers and telephones during the procedures.<sup>18</sup> Even though in earlier studies multitasking may have contributed to medical errors, lately it has also been recognized as an integral part of and skill for execution of daily practices, especially in acute care. Multitasking may be facilitated for example by providing the professionals with tools for decision support.<sup>20</sup> Previous research on multitasking has been conducted in the emergency department (ED) from the perspective of the team,<sup>20</sup> nurses and physicians,<sup>15 16</sup> showing that nurses multitasked more than physicians.<sup>16</sup> In medical and surgical wards both nurses<sup>17</sup> and physicians<sup>15</sup> multitasking has been observed. In one study on multitasking, where the OR was

1  
2  
3 included in observations as a part of the surgical care process, physicians multitasked twice as much  
4 as nurses.<sup>22</sup> In addition, various studies of interruptions involved the concept of multitasking, without  
5 investigating it further.<sup>23 24</sup>  
6  
7

8  
9 In general, interruption is a complex phenomenon, which includes the ongoing task, the nature of  
10 interruption itself, the cognitive state of the interrupted individual and the environment. These  
11 aspects may all affect patient safety and workflow.<sup>25</sup> Interruptions may result in task incompleteness,<sup>23</sup>  
12 <sup>26-28</sup> loss of attention, medication errors<sup>1</sup> and gaps in continuity of care.<sup>28</sup> Relationships have been  
13 found between increased interruptions and error rates.<sup>26 29</sup> On the other hand, it has been argued  
14 that interruptions such as speaking up in the team about a perceived risk<sup>30 31</sup> are necessary for  
15 sustaining a positive outcome for the surgical procedure. In healthcare research, the concepts  
16 interruption, disruption, disturbance and distraction are used interchangeably, and interruptions are  
17 defined in a variety of ways, which challenges comparisons between studies. A distracting stimulus is  
18 defined as any event that can cause diversion from the primary task, observed by orientation away  
19 from this task. An interruption occurs when a distraction leads to a break in main task activity.<sup>32</sup>  
20 Interruptions are unexpected<sup>33</sup> and caused by external events.<sup>34</sup> Communication has often been  
21 associated, on an individual level, with the source of the interruption.<sup>35 36</sup> Some claim that face-to-  
22 face interactions or using telephones are the media through which work interruptions are  
23 conveyed.<sup>37</sup> Research on interruptions been conducted including different professionals and in  
24 different healthcare contexts.<sup>5 22 35 38-42</sup> In the OR interruptions are studied by frequency and  
25 duration,<sup>42 43</sup> and/or together with sources and causes of interruptions.<sup>5 9 44</sup> Outcomes have been  
26 studied in terms of effects as level of distraction,<sup>43</sup> engagement,<sup>10 32</sup> delay<sup>42</sup> and interference.<sup>5</sup>  
27 Interruptions in the OR show the same lack of distinction between concepts, including another  
28 context-specific concept, surgical workflow disturbances and disruptions.<sup>9 44</sup> Several OR studies have  
29 described communication as an individual source of interruptions in terms of irrelevant, mis- and/or  
30 lack of communication.<sup>5 9 10 45 46 47</sup> Communication has also been characterized in terms of flow,  
31 mode, topic and form.<sup>48</sup> Since communication is a relevant task that supports interactions in a CAS,<sup>49</sup>  
32 it prompts communication to be categorized both as a task and a source of interruption. The  
33 definition used in this study is that interruptions occurs when a participant ceases a current task to  
34 respond to an observable external stimulus. This definition is coherent with a few previous studies  
35 conducted in the OR context.<sup>5 10 47 48 50 51</sup>  
36  
37  
38  
39  
40  
41  
42  
43  
44  
45  
46  
47  
48  
49  
50  
51

52  
53 To conclude, previous research shows that the OR is a complex environment where interruptions  
54 occur, which may affect patient safety, but which also may contribute positively to adaptations in the  
55 dynamic work process. Previous research has studied the work process of the surgical team mainly  
56  
57  
58  
59  
60

1  
2  
3 through the surgical and anesthesia process with their phases. There is a lack of knowledge regarding  
4 the multi-dimensional view of the pre- and intraoperative work process in the OR with all performed  
5 tasks included, i.e. how the work is actually done and time distribution in the surgical team. In  
6 addition, multitasking has not been studied in the work process of the surgical team in the OR.  
7 Therefore, the aim of this study was to describe the type and frequency of tasks, multitasking and  
8 interruptions during surgical procedures among the surgical team in the OR.  
9  
10  
11  
12  
13

## 14 **METHODS**

### 15 **Setting and sample**

16  
17 This prospective observational study was conducted in a central OR department at a local county  
18 hospital in Sweden. The hospital had two surgical wards, with a total of 38 beds. For general surgery,  
19 there was one department for ambulatory surgery and one central OR department. During 2016, a  
20 total of 4,118 patients underwent surgery at this hospital. The central OR department consisted of six  
21 rooms that served both acute and elective orthopedic and surgical patients. In connection to each  
22 OR, there was a preparation room where the registered nurse anesthetist (RNA) and/or the  
23 anesthesiologist sometimes prepared patients for surgery. Some medications were also stored in this  
24 area.  
25  
26  
27  
28  
29  
30  
31  
32

33 As in many other countries, surgical teams in ORs in Sweden commonly comprise six professionals,  
34 namely: RNA,<sup>52</sup> anesthesiologist, operating surgeon (surgeon) and assisting surgeon, operating room  
35 nurse (ORN) and a circulating nurse (commonly a licensed practical nurse).<sup>5</sup> For the observations we  
36 selected a convenience sample of scheduled general surgical procedures from a case list. To provide  
37 coverage and representativeness of common procedures performed at the department across  
38 weekdays (Mon–Thu) and shifts (07:30–21:00 hours) the sample included acute and elective general  
39 surgical procedures performed on adults. Since the number of people present in the OR is associated  
40 with risk for healthcare-associated infections during orthopaedic procedures,<sup>53</sup> such procedures were  
41 excluded, as were night shifts. The professionals were informed about the study during workplace  
42 meetings and invited to participate.  
43  
44  
45  
46  
47  
48  
49  
50

### 51 **Tool and definitions**

52  
53 The Work Observation Method By Activity Timing (WOMBAT) software with a portable touchscreen  
54 tablet (Lenovo 7 Tab3) was used to collect data. The tool includes different dimensions of work, as  
55  
56  
57  
58  
59  
60



1  
2 well as specific categories of task and subcategories within these dimensions.<sup>54</sup> Information recorded  
3 for each observed task included the dimensions: task type (What?), with whom (Who?) the  
4 participant interacted (e.g. other members of the surgical team), resources (How?) used (e.g.  
5 telephone), multitasking and the observable source (Why?) of any interruptions that occurred. Tasks  
6 performed by the participants were recorded by selecting the predefined categories. Multitasking  
7 was recorded on the WOMBAT tool when the participant undertook concurrent tasks, e.g. talking to  
8 a colleague while preparing medication. Interruption was in this study defined and operationalized to  
9 occur when a participant ceased a current task because of an observable interruption, e.g. while  
10 preparing infusion, stopping the task when the surgeon asks to change operating table's position.  
11  
12  
13  
14  
15  
16  
17

### 18 **Adaptation of the WOMBAT tool to the OR context**

19  
20  
21 In order to ensure validity, ORNs', RNAs' and surgeons' work tasks were first mapped and then  
22 discussed with one expert from each targeted profession. The researchers – who later carried out the  
23 observations – discussed representation of dimensions, categories, subcategories, multitasking,  
24 sources and causes to interruptions in WOMBAT, until consensus was reached over mutually  
25 exclusive definitions (Table 1). Common sources and causes to interruptions in the OR have been  
26 presented in previous taxonomies and frameworks,<sup>5 44 55</sup> and based on the existing literature and  
27 pilot observations, categories were developed for observations of interruptions using WOMBAT.  
28 These categories were later confirmed by field notes on examples of the observable cause to an  
29 interruption. To verify the correct programming of WOMBAT, written dummy cases were developed  
30 and tested. Prior to actual data collection, researchers conducted approximately 15 hours each of  
31 pilot testing of WOMBAT based on observations of the three professions, during 12 surgical  
32 procedures. The categories, subcategories and their task classifications were then once more refined  
33 and adapted to the WOMBAT tool. For example, indirect care was divided in two phases (pre and  
34 intra) in order to better represent the preparatory phase before patient's arrival at the OR. To further  
35 clarify the source of an interruption, broad categories were programmed under an additional  
36 dimension: "Why?".  
37  
38  
39  
40  
41  
42  
43  
44  
45  
46  
47  
48  
49  
50  
51  
52  
53  
54  
55  
56  
57  
58  
59  
60

**Table 1.** Task classifications for the surgical team

| Task categories and subcategories                | Definitions                                                           | Included activities                                                                                                                                 |
|--------------------------------------------------|-----------------------------------------------------------------------|-----------------------------------------------------------------------------------------------------------------------------------------------------|
| <b>Pre-indirect care</b>                         | Tasks indirectly related to patient care prior to patient arrival     |                                                                                                                                                     |
| Disinfect                                        |                                                                       | Pre-operative hand washing/disinfection                                                                                                             |
| Organize/arrange                                 |                                                                       | Preparing equipment                                                                                                                                 |
| Control/Count                                    |                                                                       | Checking equipment, counting instruments, swabs                                                                                                     |
| Read                                             |                                                                       | Reading/searching patient information                                                                                                               |
| Clean                                            |                                                                       | Arranging and cleaning                                                                                                                              |
| Protect                                          |                                                                       | Applying sterile gown, gloves, apron                                                                                                                |
| <b>Intra-indirect care</b>                       | Tasks indirectly related to patient care, when the patient is present |                                                                                                                                                     |
| Observe/monitor                                  |                                                                       | Monitoring patients' vital parameters                                                                                                               |
| Disinfect                                        |                                                                       | Hand washing/disinfection                                                                                                                           |
| Organize/arrange                                 |                                                                       | Preparing equipment                                                                                                                                 |
| Control/count                                    |                                                                       | Controlling equipment, counting instruments, swabs                                                                                                  |
| Read                                             |                                                                       | Reading and reviewing patient information                                                                                                           |
| Clean                                            |                                                                       | Arranging and cleaning                                                                                                                              |
| Protect                                          |                                                                       | Applying protective apron or gloves                                                                                                                 |
| <b>Direct care</b>                               | Tasks directly related to patient care                                |                                                                                                                                                     |
| Skin disinfection                                |                                                                       | Disinfecting the incision area, including drying time                                                                                               |
| Drape                                            |                                                                       | Draping the patient                                                                                                                                 |
| Assist                                           |                                                                       | Assisting another professional                                                                                                                      |
| Instrumentation                                  |                                                                       | Instrumentation with surgeon                                                                                                                        |
| Perform invasive surgical/ anesthetic procedures |                                                                       | Performing the procedure/intubation, inserting intravenous lines                                                                                    |
| Perform patient care                             |                                                                       | Communicating with the patient, mobilizing of the patient, dressing the wound, moving the patient to the bed                                        |
| <b>Medication</b>                                | Tasks related to providing medication to a patient                    |                                                                                                                                                     |
| Prepare                                          |                                                                       | Reading prescriptions, preparing syringes                                                                                                           |
| Administer                                       |                                                                       | Giving medication to the patient                                                                                                                    |
| Document                                         |                                                                       | Documenting medication care                                                                                                                         |
| Communicate                                      |                                                                       | Discussing medication care and prescriptions, asking for clarification                                                                              |
| <b>Documentation</b>                             | Any recording of patient information on paper or computer             |                                                                                                                                                     |
| <b>Communication</b>                             | Any work-related or social discussion with another staff member       |                                                                                                                                                     |
| Professional                                     |                                                                       | Discussions related to the procedure, planning the care of the patient, paging surgeon or anesthesiologist, reporting, completing the WHO checklist |
| Irrelevant                                       |                                                                       | Case-irrelevant communication                                                                                                                       |
| <b>Supervision</b>                               | Any activity focused on teaching or education                         | <i>(Note: When supervision is taking place, all other tasks are "multitasking".)</i>                                                                |
| <b>Other</b>                                     | Any other task not included above                                     | For example: waiting for a colleague or a decision, when there is no communication                                                                  |
| <b>In transit</b>                                | Any movement between rooms                                            | Transferring the patient into and out of the room<br>Getting equipment needed                                                                       |

### Inter-rater reliability

In total, 12 rounds of inter-rater reliability testing were conducted by the researchers independently observing the same participant for 30 minutes.<sup>56</sup> Situations that were difficult to record using the pre-defined task definitions were discussed between sessions to achieve agreement in subsequent observations. Inter-rater reliability was calculated by comparing the number and type of tasks recorded by the two researchers (e.g. direct care, indirect care, communication and other). According to the WOMBAT manual, once an inter-rater reliability  $\geq 0.81$  has been achieved, data collection may commence.<sup>56</sup> The total Cohen's kappa score for number of tasks ( $n=2,439$ ) for the three professions in this study was  $k0.86$ , indicating high observer agreement.<sup>57</sup>

### Data collection

Observations were performed between 07:30 and 21:00 on Monday to Thursday from 14 November to 15 December 2016. Prior to the observation sessions, professionals involved in selected surgical procedures provided informed consent and were informed that they might withdraw from the study at any time. Consent was not obtained from patients and other staff, as they were not targeted in the observations. However, they were informed orally about the study and were given the option to deny observations of the procedure they were participating in. If this occurred prior to or during a surgical procedure the observation should stop and already collected data would be excluded from the study. However, this did not occur. Observations of ORNs and RNAs started when the participants began to plan and prepare for the surgical procedure and continued until the patient had left the OR. The RNAs were also observed in the preparation room, which was adjacent to the OR. Observation of the surgeon started when they entered the OR and ended when they left the OR after the surgical procedure. Thus, the surgeons were observed for a total of 37 hours whereas ORNs and RNAs were observed for 66 hours each. The researcher followed the same participant unobtrusively during the whole surgical procedure, registering tasks the participant performed, with whom and how.<sup>58</sup> When an interruption occurred, manifest sources (what could be observed) of the interruption was registered in WOMBAT. The underlying cause, often verbally expressed, of the observable source was written down as field notes. To complete the structured observations with contextual factors such as testing of new medical-technical equipment, field notes were made during and directly after the observations.

## Data analysis

Descriptive statistics were used to determine the total observation time, number and proportion of tasks, proportion of category-specific task time and multitasking time based on total observed time per profession and interruption rate per hour of the surgical team. Large-sample normal approximation with Wilson's interval was used to calculate 95% confidence intervals (CIs) for the number of tasks, proportions of category-specific task time and multitasking time. Analysis of the data was performed using Microsoft Excel 2016 and the Statistical Package for Social Sciences, SPSS version 21.

## RESULTS

During the data collection period, 199 procedures in general surgery were performed at the OR department and 46 (23.1%) of these were observed. The 46 surgical procedures included in the data collection contained 78 unique recorded observation sessions, including 26 observations per profession. ORNs and RNAs were observed for 66 hours each and surgeons were observed for 37 hours, with a total time of 169 observation hours. Of the 46 surgical procedures, four were acute and the rest were elective. According to type of surgery, 28 of these procedures were laparoscopic and 18 were conducted with open surgery. The surgical procedures, from incision until wound closure, lasted between 38 minutes and 3 hours and 15 minutes (mean time 42 minutes). General anesthesia was administered in 42 of the 46 (91.3%) surgical procedures and regional anesthesia in four (8.7%).

Demographic data for the participants are presented in Table 2.

**Table 2.** Demographic data for operating room nurses (ORNs), registered nurse anesthetists (RNAs), and surgeons during the observed surgical procedures (n=26), by profession

| Profession   | Observation time, hours | Number of observed participants | Mean age, years (range) | Gender of the participant, female/male, number | Mean experience as specialist, years (range) | Mean experience at the participating hospital, years (range) |
|--------------|-------------------------|---------------------------------|-------------------------|------------------------------------------------|----------------------------------------------|--------------------------------------------------------------|
| ORNs         | 66                      | 10*                             | 46 (26–60)              | 9/1                                            | 13 (2–39)                                    | 10 (0.5–39)                                                  |
| RNAs         | 66                      | 8*                              | 50 (32–64)              | 3/5                                            | 18 (5–34)                                    | 14 (5–28)                                                    |
| Surgeons     | 37                      | 9*                              | 47 (32–65)              | 2/7                                            | 13 (0–32)                                    | 9 (2–28)                                                     |
| <b>Total</b> | <b>169</b>              | <b>27</b>                       | <b>47</b>               | <b>14/13</b>                                   | <b>15</b>                                    | <b>11</b>                                                    |

\* Same ORN was observed 1–7 times

\* Same RNA was observed 2–6 times

\* Same surgeon was observed 1–8 times

### Observed tasks and category-specific task time

Before and during surgical procedures surgical teams perform 10,870 tasks in total (64.3 per hour). RNAs performed 4,752 tasks (72.0 per hour), surgeons 2,271 (61.4 per hour) and ORNs 3,847 tasks (58.3 per hour). For the surgical team, communication (n=4,968) are shown to be the most frequent task, followed by intra-indirect care (n=1,935). Regarding proportion of tasks per profession, communication is most frequent for surgeons (84.0%, n=1,908), followed by ORNs (50.6%, n=1,948) and RNAs (23.4%, n=1,112) (Table 3). However, the proportion of category-specific task time per total observed time per profession has shown that direct care for surgeons equated with the surgical procedure, despite the low number of tasks dominating the surgeons' (54.1%, n=100) and ORNs' (33.5%, n=615) intra-operative time. For RNAs (41.0%, n=1,079) intra-indirect care had the largest proportion of category-specific task time. Category-specific task time for communication (ORNs 18.0%, RNAs 8.3% and surgeons 37.8%), in comparison with the high frequency of communication, is not as dominant as direct care. This reflects that communication is frequent but short, unlike direct

1  
2  
3 care that is less frequent but ongoing for a longer period of time. Of the total time spent on  
4 communication (47 hours and 16 minutes), professional communication represented 38 hours and  
5 32 minutes (81.4%), while case-irrelevant communication comprised 8 hours and 47 minutes  
6 (18.6%). Proportions of category-specific task time, i.e. the observed time participants spent  
7 performing tasks in a particular category, are reported in Table 3 and Figure 1.  
8  
9  
10  
11  
12  
13  
14  
15  
16  
17  
18  
19  
20  
21  
22  
23  
24  
25  
26  
27  
28  
29  
30  
31  
32  
33  
34  
35  
36  
37  
38  
39  
40  
41  
42  
43  
44  
45  
46  
47  
48  
49  
50  
51  
52  
53  
54  
55  
56  
57  
58  
59  
60

For peer review only

**Table 3.** Number, frequency and proportion of tasks, proportion of category-specific task time and multitasking for each profession (operating room nurses (ORNs), registered nurse anesthetists (RNAs) and surgeons)

| Task category              | Number of tasks | Frequency of tasks per total observed time per profession* | Proportion of tasks per profession (%) (95% CI)* | Proportion of category-specific task time per total observed time per profession* (%) (95% CI)* | Proportion of multi-tasking during category-specific task time per total observed time per profession* (%) (95% CI)* |
|----------------------------|-----------------|------------------------------------------------------------|--------------------------------------------------|-------------------------------------------------------------------------------------------------|----------------------------------------------------------------------------------------------------------------------|
| <b>Communication</b>       |                 |                                                            |                                                  |                                                                                                 |                                                                                                                      |
| ORNs                       | 1,948           | 29.5                                                       | 50.6 (49.1–52.2)                                 | 18.0 (17.0–19.1)                                                                                | 68.8 (65.8–71.7)                                                                                                     |
| RNAs                       | 1,112           | 16.8                                                       | 23.4 (22.2–24.6)                                 | 8.3 (7.7–9.0)                                                                                   | 84.0 (80.8–86.8)                                                                                                     |
| Surgeons                   | 1,908           | 51.6                                                       | 84.0 (82.4–85.5)                                 | 37.8 (36.2–39.5)                                                                                | 89.0 (87.2–90.6)                                                                                                     |
| <b>Total</b>               | <b>4,968</b>    |                                                            |                                                  |                                                                                                 |                                                                                                                      |
| <b>Intra-indirect care</b> |                 |                                                            |                                                  |                                                                                                 |                                                                                                                      |
| ORNs                       | 743             | 11.3                                                       | 19.3 (18.1–20.6)                                 | 17.6 (16.5–18.6)                                                                                | 40.7 (37.6–43.9)                                                                                                     |
| RNAs                       | 1,079           | 16.3                                                       | 22.7 (21.5–23.9)                                 | 41.0 (39.9–42.2)                                                                                | 76.4 (74.8–77.9)                                                                                                     |
| Surgeons                   | 113             | 3.1                                                        | 5.0 (4.2–6.0)                                    | 2.5 (2.1–3.1)                                                                                   | 23.0 (15.4–32.9)                                                                                                     |
| <b>Total</b>               | <b>1,935</b>    |                                                            |                                                  |                                                                                                 |                                                                                                                      |
| <b>Direct care</b>         |                 |                                                            |                                                  |                                                                                                 |                                                                                                                      |
| ORNs                       | 615             | 9.3                                                        | 16.0 (14.9–17.2)                                 | 33.5 (32.3–35.0)                                                                                | 44.9 (42.5–47.2)                                                                                                     |
| RNAs                       | 851             | 12.9                                                       | 17.9 (16.8–19.0)                                 | 11.2 (10.5–12.0)                                                                                | 74.4 (71.3–77.4)                                                                                                     |
| Surgeons                   | 100             | 2.7                                                        | 4.4 (3.6–5.3)                                    | 54.1 (52.4–55.8)                                                                                | 62.5 (60.3–64.7)                                                                                                     |
| <b>Total</b>               | <b>1,566</b>    |                                                            |                                                  |                                                                                                 |                                                                                                                      |
| <b>Medication</b>          |                 |                                                            |                                                  |                                                                                                 |                                                                                                                      |
| ORNs                       | 74              | 1.1                                                        | 1.9 (1.5–2.4)                                    | 0.6 (0.4–0.8)                                                                                   | 43.7 (27.4–60.8)                                                                                                     |
| RNAs                       | 942             | 14.3                                                       | 19.8 (18.7–21.0)                                 | 7.8 (7.1–8.4)                                                                                   | 84.8 (81.5–87.6)                                                                                                     |
| Surgeons                   | 85              | 2.3                                                        | 3.7 (3.0–4.6)                                    | 1.1 (0.8–1.5)                                                                                   | 84.3 (69.6–92.6)                                                                                                     |
| <b>Total</b>               | <b>1,101</b>    |                                                            |                                                  |                                                                                                 |                                                                                                                      |
| <b>Documentation</b>       |                 |                                                            |                                                  |                                                                                                 |                                                                                                                      |
| ORNs                       | 57              | 0.9                                                        | 1.5 (1.2–1.9)                                    | 1.5 (1.2–1.8)                                                                                   | 19.7 (12.2–29.7)                                                                                                     |
| RNAs                       | 453             | 6.9                                                        | 9.5 (8.7–10.4)                                   | 5.5 (5.0–6.1)                                                                                   | 97.8 (96.0–98.9)                                                                                                     |
| Surgeons                   | 24              | 0.7                                                        | 1.1 (0.7–1.6)                                    | 1.3 (0.9–1.7)                                                                                   | 20.2 (11.2–34.5)                                                                                                     |
| <b>Total</b>               | <b>534</b>      |                                                            |                                                  |                                                                                                 |                                                                                                                      |
| <b>Other</b>               |                 |                                                            |                                                  |                                                                                                 |                                                                                                                      |
| ORNs                       | 240             | 3.6                                                        | 6.2 (5.5–7.1)                                    | 8.5 (7.8–9.3)                                                                                   | 16.4 (13.3–20.2)                                                                                                     |
| RNAs                       | 56              | 0.9                                                        | 1.2 (0.9–1.5)                                    | 1.1 (0.9–1.3)                                                                                   | 26.9 (18.2–38.2)                                                                                                     |
| Surgeons                   | 16              | 0.4                                                        | 0.7 (0.4–1.1)                                    | 1.1 (0.8–1.5)                                                                                   | 15.3 (7.2–31.1)                                                                                                      |
| <b>Total</b>               | <b>312</b>      |                                                            |                                                  |                                                                                                 |                                                                                                                      |
| <b>In transit</b>          |                 |                                                            |                                                  |                                                                                                 |                                                                                                                      |
| ORNs                       | 89              | 1.4                                                        | 2.3 (1.9–2.8)                                    | 4.9 (4.4–5.5)                                                                                   | 12.8 (9.2–17.3)                                                                                                      |
| RNAs                       | 112             | 1.7                                                        | 2.4 (2.0–2.8)                                    | 3.6 (3.2–4.1)                                                                                   | 49.6 (43.5–55.7)                                                                                                     |
| Surgeons                   | 16              | 0.4                                                        | 0.7 (0.4–1.1)                                    | 0.7 (0.5–1.1)                                                                                   | 0.3                                                                                                                  |
| <b>Total</b>               | <b>217</b>      |                                                            |                                                  |                                                                                                 |                                                                                                                      |
| <b>Pre-indirect care</b>   |                 |                                                            |                                                  |                                                                                                 |                                                                                                                      |
| ORNs                       | 59              | 0.9                                                        | 1.5 (1.2–2.0)                                    | 2.0 (1.7–2.4)                                                                                   | 42.3 (33.1–51.5)                                                                                                     |
| RNAs                       | 93              | 1.4                                                        | 2.0 (1.6–2.4)                                    | 1.5 (1.3–1.9)                                                                                   | 41.3 (32.3–50.6)                                                                                                     |
| Surgeons                   | -               | -                                                          | -                                                | -                                                                                               | -                                                                                                                    |
| <b>Total</b>               | <b>152</b>      |                                                            |                                                  |                                                                                                 |                                                                                                                      |
| <b>Supervision</b>         |                 |                                                            |                                                  |                                                                                                 |                                                                                                                      |
| ORNs                       | 22              | 0.3                                                        | 0.6 (0.4–0.9)                                    | 13.4 (12.5–14.4)                                                                                | 65.9 (62.3–69.3)                                                                                                     |
| RNAs                       | 54              | 0.8                                                        | 1.1 (0.9–1.5)                                    | 19.9 (19.0–21.0)                                                                                | 89.0 (87.3–90.6)                                                                                                     |
| Surgeons                   | 9               | 0.2                                                        | 0.4 (0.2–0.7)                                    | 1.4 (1.1–1.9)                                                                                   | 99.9 (99.8–100.0)                                                                                                    |
| <b>Total</b>               | <b>85</b>       |                                                            |                                                  |                                                                                                 |                                                                                                                      |
| <b>Total</b>               | <b>10,870</b>   |                                                            |                                                  |                                                                                                 |                                                                                                                      |
| <b>ORNs</b>                | <b>3,847</b>    | <b>58.3 per hour</b>                                       | <b>35.4%</b>                                     | <b>33.6%</b>                                                                                    | <b>46.8%</b>                                                                                                         |
| <b>RNAs</b>                | <b>4,752</b>    | <b>72.0 per hour</b>                                       | <b>43.7%</b>                                     | <b>44.4%</b>                                                                                    | <b>79.1%</b>                                                                                                         |
| <b>Surgeons</b>            | <b>2,271</b>    | <b>61.4 per hour</b>                                       | <b>20.9%</b>                                     | <b>22.0%</b>                                                                                    | <b>70.8%</b>                                                                                                         |

\*CI = confidence interval.

\*Total observation time per profession was 66 hours each for ORNs and RNAs, whereas surgeons were observed for 37 hours

1  
2  
3  
4  
5  
6  
7  
8  
9 ---- Figure 1. Here ----  
10  
11  
12  
13  
14  
15  
16  
17  
18

### 19 **Multitasking**

20  
21 During 169 hours of observations, 261 task hours were recorded. The discrepancy between  
22 observation time and task hours is explained by multitasking, caused by a professional conducting  
23 multiple tasks simultaneously. The observed surgical team spent 48.2% (82 hours 6 minutes) of the  
24 total observation time multitasking. The proportion that each profession spent multitasking out of  
25 their total observed time per profession was 63.1% (42 hours 2 minutes) for RNAs, 53.8% (20 hours 4  
26 minutes) for surgeons and 30.1% (19 hours 58 minutes) for ORNs. In 74.0% of the observed tasks  
27 (n=8,106 out of the total observed tasks n=10,870) the staff engaged in two (n=6,369) and  
28 sometimes three (n=1,650) simultaneous tasks. An example of this is observing an ongoing  
29 supervision of a student, engaging the team in the same discussion while still monitoring the patient  
30 and simultaneously disinfecting hands. Multitasking was most often observed in ORNs' and surgeons'  
31 work during communication (68.8% and 89.0% of the task time, respectively) and supervision (65.9%  
32 and 99.9%), while for RNAs, multitasking happened mostly during documentation (97.8%) and  
33 supervision (89.0%). The proportion of task time spent multitasking for the surgical team is presented  
34 in Table 3.  
35  
36  
37  
38  
39  
40  
41  
42  
43

### 44 **Interruptions, interrupted task, sources of interruption and response after interruption**

45  
46 In total, 426 interruptions were observed and the overall interruption rate across all tasks was 2.5  
47 times per hour. Among professions, RNAs were interrupted most frequently (n=254, 59.6%), 3.8  
48 times per hour (Table 4). The most interrupted task was communication, with 4.7 interruptions per  
49 hour. Interruptions were more common during professional communication (5.9 per hour, n=207)  
50 than during irrelevant communication (2.9 per hour, n=25). Out of all interruptions, equipment-  
51 related, i.e. concerning missing or malfunctioning equipment, were the most common at 114  
52 (26.7%), and the second most common interruptions were related to the procedure, e.g. fog on lens  
53  
54  
55  
56  
57  
58  
59  
60



at 95 (22.3%). The ORNs' work was typically interrupted by equipment-related (n=48, 50.5%), and procedure-related issues (n=23, 24.2%). Medication-related interruptions were not common (n=46, 10.7% of all interruptions) and affected only the RNAs' work (18.1%). After medication-related interruptions, the second most prevalent interruption in RNAs' work was related to equipment (n=39, 15.3%). Procedure-related interruptions affected surgeons' work most often (n=35, 45.6%), in addition to equipment-related problems (n=27, 35.1%) (Table 4). The interruptions were most commonly followed by communication (n=150, 39.1%), of which the majority was professional communication (n=138, 92.0%). Additionally, team responded to interruptions with intra-indirect care (n=65, 16.9%) or by providing direct care (n=53, 13.8%). ORNs responded to interruptions by communication (n=37, 39.4%, of which professional n=34, 91.8%) and with intra-indirect care (n=22, 23.4%). The RNAs' responding tasks were most often communication (n=51, 23.8%, of which professional n=44, 86.3%) or medication-related tasks (n=48, 22.4%). Surgeons reacted mostly with communication only (n=62, 81.5%, of which professional n=60, 96.8%).

**Table 4.** Sources and causes of observed interruptions, giving overall frequency and frequency per hour, for operating room nurses (ORNs), registered nurse anesthetists (RNAs), surgeons\* and for the surgical team together

| Sources of interruptions          | Examples of causes to interruptions                                                          | ORNs      | RNAs       | Surgeons  | Total      |
|-----------------------------------|----------------------------------------------------------------------------------------------|-----------|------------|-----------|------------|
| <b>Equipment, n</b>               | Malfunction, missing or wrong equipment<br>Change of OR table                                | 48        | 39         | 27        | 114        |
| <b>Related to procedure, n</b>    | Providing additional information<br>Contaminating sterile area<br>Fog on lens                | 23        | 37         | 35        | 95         |
| <b>Related to medication, n</b>   | Missing or wrong medication                                                                  | 0         | 46         | 0         | 46         |
| <b>Change of shift, n</b>         | Changing staff for break or lunch during the procedure                                       | 7         | 33         | 0         | 40         |
| <b>Alarm, n</b>                   | Alarm from devices or monitors<br>Indicating high gas pressure                               | 2         | 31         | 1         | 34         |
| <b>External factor, n</b>         | External person entering the room to watch the procedure or to discuss test of new equipment | 4         | 22         | 4         | 30         |
| <b>Related to patient, n</b>      | Changing patient position<br>Changes in patient's vital signs                                | 4         | 20         | 4         | 28         |
| <b>Telephone/pager, n</b>         | Searching for surgeons<br>Planning for next procedure                                        | 6         | 16         | 5         | 27         |
| <b>Other, n</b>                   | Wrong action when assisting                                                                  | 1         | 10         | 1         | 12         |
| <b>Total, n</b>                   |                                                                                              | <b>95</b> | <b>254</b> | <b>77</b> | <b>426</b> |
| <b>Interruptions, n, per hour</b> |                                                                                              | 1.4       | 3.8        | 2.0       | 2.5        |

\*Total observation time per profession was 66 hours each for ORNs and RNAs whereas surgeons were observed for 37 hours

## DISCUSSION

This study provided a multidimensional view of the pre- and intraoperative work process of the surgical team in the OR, including the work of ORNs, RNAs and surgeons. In addition to the previous descriptions of the surgical phases and steps, we provide broader and more detailed description of the multitude of tasks, multitasking and interruptions. Communication was the most common task performed by the surgical team and represented almost half of all observed tasks. Multitasking covered a lot of the professionals' time and was most often observed in ORNs' and surgeons' work during communication. Interruptions did not occur frequently in the OR, which differs from previous research findings. Equipment- and procedure-related interruptions were the most prevalent, as compared to phones and pagers reported in other OR studies. Furthermore, RNAs, not the surgeons, were most interrupted, and the interruptions were most commonly responded to by professional communication.

In total, almost 11,000 tasks were recorded during the observations in the OR. The amount of tasks studied in other contexts<sup>39 59-61</sup> makes the ICU most comparable, with more tasks during a corresponding observation time.<sup>61</sup> Communication, and especially professional communication, was the most common task within the surgical team, which is consistent with several other studies from other settings using WOMBAT for data collection.<sup>19 22 38 54 59 61</sup> However, case-irrelevant communication was also observed, such as social conversations to create a team spirit and a positive and open atmosphere. To support clinical work, small talk has been shown to be of importance to elicit large amounts of information and build relationships.<sup>62</sup> As expected, surgeons and ORNs spent half and one third of their time respectively on direct care. In comparison with physicians in the ICU, surgeons performed more direct care, which can be explained by their work operating on the patient.<sup>61</sup> For the RNAs, intra-indirect care accounted for the largest proportion of their time, reflecting the time-consuming task of continuously monitoring the patient's vital signs.

The surgical teams in the OR were observed multitasking almost half of the time. In rare cases, as many as three tasks occurred simultaneously, which has also been reported in another study on physicians in general wards.<sup>63</sup> In a study where the surgical care process was observed including the OR and surgical ward, nurses and physicians spent approximately one sixth and one third respectively of their time multitasking.<sup>22</sup> In addition, as the OR department in our study served as a teaching hospital, nursing students were present during 22 sessions, explaining the proportion of supervision in the tasks and also the amount of multitasking. A study of physicians in the ICU<sup>61</sup> showed that, compared with physicians working in medical and surgical wards,<sup>15</sup> they were more likely to multitask

1  
2  
3 (one quarter and one fifth respectively). In the ED, multitasking time varied depending on the  
4 profession – 13% for registrars, 23% for physicians, and 12%–28% for nurses.<sup>26 39 54</sup> Since the surgical  
5 teams in our study were multitasking almost half of their time, it elucidates the complexity of the OR  
6 context, including time pressure and high cognitive demands.<sup>5</sup>  
7  
8

9  
10 Similar to other studies using WOMBAT for data collection,<sup>17 59 60 63</sup> communication played an  
11 important role throughout the surgical procedure in our study. Even though performed  
12 simultaneously with e.g. direct care, communication may be seen as a team-coordinating and  
13 resilience-enhancing behavior. Maintaining a shared situational awareness<sup>64</sup> within the team is a key  
14 function in anticipating possible deviations in the intra-operative process. Since communication in  
15 the team was a dominant task involved in multitasking, it may reflect the transfer of important  
16 information, and contribute to creating a smooth and efficient care process.<sup>16</sup> Thus restrictions to  
17 prevent multitasking may also have unwanted consequences.<sup>15</sup> Training to improve healthcare  
18 professionals' skills in dealing with multiple goals and demands, prioritization, and efficient task  
19 allocation – for example, when to speak up – may have positive implications for patient safety.<sup>2 15</sup>  
20  
21  
22  
23  
24  
25  
26  
27

28 Interactions not only predispose the team to multitasking, but they may also lead to interruptions.  
29 Interruptions occurring in the OR may lead to loss of information, gaps in continuity, breakdown in  
30 adjustments, and adverse events.<sup>11 65</sup> In comparison with other studies, where entering the OR and  
31 the telephone/pager were the most common sources of interruptions,<sup>51</sup> our study showed  
32 equipment- and procedure-related issues as the most common sources of interruptions. These,  
33 together with other sources of interruptions, should be taken into consideration when anticipating  
34 and creating shared situation awareness when preparing for the surgical procedure. The RNAs were  
35 interrupted most frequently, with 3.8 interruptions per hour. This deviates from findings in other  
36 studies, which report that ORNs and surgeons are interrupted most frequently.<sup>5</sup> Our observations  
37 also showed that the RNAs often communicated with professionals outside the OR and transferred  
38 information back to the surgical team. Surgeons interrupted by telephones or pagers are commonly  
39 described in the literature,<sup>5 51</sup> which is not consistent with the relatively low numbers in this study. In  
40 the hospital where observations were conducted, restrictions regarding pagers and personal  
41 telephones had been implemented in the OR. These restrictions could likely be one reason for the  
42 lower interruption rates for surgeons. In ICUs, nurses and physicians have, in general, been reported  
43 to be interrupted approximately 3.5 times per hour,<sup>38</sup> and physicians in EDs 6.6 times per hour.<sup>26</sup> In  
44 previous studies, interruptions occurred almost ten times per hour on average in the OR.<sup>51 5</sup> In  
45 observations conducted that combined the OR and surgical ward, almost 13 interruptions per hour  
46 for nurses and physicians were identified,<sup>22</sup> while we found that interruptions occurred 2.5 times per  
47  
48  
49  
50  
51  
52  
53  
54  
55  
56  
57  
58  
59  
60

1  
2  
3 hour. Apart from length and type of the surgical procedure, this disparity may also in part be  
4 explained by the fact that most observed procedures were elective.  
5

6  
7 The observed hospital was small, which may have had a positive influence on the number of  
8 interruptions. From the field notes it could be seen that interruptions were not always negative in  
9 nature, which also agrees with previous research.<sup>31</sup> Out of all interruptions identified in this study,  
10 patient-related and procedure-related interruptions often arose in situations where safe and smooth  
11 intra-operative care processes needed to be secured – e.g. when patient positioning was altered for  
12 better visibility or changed operative plans required new equipment. This is an example of how team  
13 adaptation can counteract the negative impact of increased complexity introduced by interruptions  
14 or new medical challenges.  
15  
16  
17  
18  
19

20  
21 Most interruption research in the OR has described communication as a source of interruption, in  
22 terms of miscommunication and lack of communication.<sup>5 10 45-47</sup> For the surgical team, the most  
23 interrupted task was communication. In other studied contexts, such as the ICU, the most  
24 interrupted task has been documentation.<sup>61</sup> This elucidates that the OR context is a CAS, highly  
25 dependent on communication that supports and adjusts the complex interactions between those  
26 involved in a surgical procedure. Communication in our study was often observed as a task involved  
27 in interruptions and multitasking, in order to advance the pre- and intraoperative work process.  
28 Consistent with others,<sup>38</sup> the results also showed that interruptions were most commonly followed  
29 by professional communication.  
30  
31  
32  
33  
34  
35

36  
37 The sometimes unpredictable nature of work in an OR, and the number and complexity of tasks,  
38 multitasking and interruptions, requires the surgical team to interact, organize and solve problems  
39 through communication or by using information technology. Communication and multitasking both  
40 help and hinder task completion. The timing and coordination of activities during a surgical  
41 procedure requires communication. During our observations, participants were forced to alter or halt  
42 their activities and proceed with different tasks on multiple occasions. Some of these situations may  
43 be interpreted as adaptations<sup>30</sup> while others were clear interruptions, which highlights the dual  
44 nature of interruptions.<sup>30 31</sup> Our data indicate the existence of a multitude of tasks involved in  
45 everyday work in the OR. They also support the notion that, rather than trying to control complexity,  
46 it should be embraced and applied as a clarifying lens to understand today's healthcare  
47 organizations.<sup>49</sup> The surgical team's ability to overcome and compensate for shortcomings and to  
48 adapt to variations and demands must be further explored and understood. Strategies used by  
49 professionals when successfully navigating through and recovering from unexpected events and  
50  
51  
52  
53  
54  
55  
56  
57  
58  
59  
60

1  
2  
3 interruptions that occur in a CAS should be studied and used as a central theme for supporting  
4 resilience performance.<sup>12</sup>  
5

### 6 7 **Strengths and limitations**

8  
9  
10 This study adds to the knowledge of how complex work is performed in the OR by providing a  
11 multidimensional view of the complete pre- and intraoperative work process of the surgical team. In  
12 order to produce an interprofessional view of the teamwork in the OR, the observations included  
13 three key professions: ORNs, RNAs and surgeons. However, it should be considered that the total  
14 observation time was somewhat less for surgeons, as the time for observations of preparation before  
15 the surgical procedures did not include surgeons. The data collection tool used, WOMBAT, employs a  
16 structured observation protocol with an objective definition of “interruption”, which may reduce the  
17 risk of potential measurement errors. Unlike previous WOMBAT studies reporting interrupted tasks  
18 and initiated tasks after the interruption, we report the observable source and cause of interruptions  
19 (Why). Another strength is that both observers were experienced RNAs and one of the researchers  
20 also had experience as an ORN. However, in order to avoid bias, the observations were conducted in  
21 a hospital where the researchers had not previously worked.  
22  
23  
24  
25  
26  
27  
28

29  
30 Surgical teams in Sweden mostly consist of an RNA, anesthesiologist, operating and assistant  
31 surgeon, ORN and circulating nurse. Even though the assistant surgeon, anesthesiologist and the  
32 circulating nurse were observed indirectly when interacting with the observed ORN, RNA or surgeon,  
33 the nature of performed tasks and how often they were interrupted was not recorded. This may be  
34 considered a limitation, as the whole surgical team is not represented in this study. Regulations  
35 concerning the amount of people in the room and the risk for healthcare-associated infections in  
36 orthopedic implant surgery<sup>53</sup> contributed to exclusion of these procedures, which may be taken into  
37 consideration when interpreting the results. Some participants were also observed on several  
38 occasions, which may imply a potential risk for a systematic bias. This study was performed in one  
39 hospital only and the observations did not include night shifts, weekend shifts or procedures  
40 conducted on Fridays. This may limit the representativeness for different work shifts and may reduce  
41 the generalizability of the findings.  
42  
43  
44  
45  
46  
47  
48

### 49 **Conclusions**

50  
51 Communication was identified as a major component in the multidimensional pre- and  
52 intraoperative work process of the surgical team. Work in the OR consists of multiple professionals  
53 performing many tasks, with the probability of a high degree of interrelatedness, and therefore may  
54 be considered a CAS. In order to accomplish tasks, meet goals, develop and deliver safe care for  
55  
56  
57

1  
2  
3 patients, professionals share information and coordinate through communication. Thus,  
4 communication between members of the team seems to be a contributing factor to success during  
5 surgical procedures as it may support the safe management of complexity. The team constantly dealt  
6 with multitasking and interruptions, both with potential impact on patient safety and workflow.  
7 Interruptions were commonly followed by professional communication, which may reflect the  
8 interactions and constant adaptations in a CAS. Future patient safety research should focus on  
9 understanding the complexity within the system, different work processes, and how teams meet the  
10 challenges of a CAS.  
11  
12  
13  
14  
15

### 16 17 **Contributorship statement**

18  
19 C.G., M.U., U.N., A.E. and M.E. contributed to the study design. C.G. was the project supervisor and  
20 performed the initial exploratory observations. C.G. and K.O. were responsible for identification and  
21 definitions of categories, as well as data collection and drafting the manuscript. They also undertook  
22 the initial interpretation of the data, which was followed by discussions with M.U., U.N., K.P.H., A.E.  
23 and M.E. Drafts of the manuscript were reviewed by M.U., U.N., K.P.H., A.E. and M.E. All authors  
24 have read and approved the final manuscript.  
25  
26  
27  
28  
29

### 30 31 **Competing interests**

32  
33 The authors report no conflict of interest. The authors alone are responsible for the content and the  
34 writing of this paper.  
35  
36  
37

### 38 39 **Funding**

40  
41 This work was funded by The Center for Clinical Research Dalarna and by Finnish state funding for  
42 university-level health research, but the funders were not involved in the design and running of the  
43 study.  
44  
45

### 46 47 **Data sharing statement**

48  
49 No additional data are available.  
50

### 51 52 **Acknowledgements**

53  
54 We want to thank Ville Pöntinen and Mesfin Tessma for statistical support. We also thank the heads  
55 of participating departments and the surgical teams for their willingness to participate in this study.  
56  
57

1  
2  
3  
4  
5  
6  
7  
8  
9  
10  
11  
12  
13  
14  
15  
16  
17  
18  
19  
20  
21  
22  
23  
24  
25  
26  
27  
28  
29  
30  
31  
32  
33  
34  
35  
36  
37  
38  
39  
40  
41  
42  
43  
44  
45  
46  
47  
48  
49  
50  
51  
52  
53  
54  
55  
56  
57  
58  
59  
60

**Ethics approval**

Ethical approval was provided by the regional ethical review board in Uppsala, Sweden (reference number 2016/264).

**Provenance and peer review**

Not commissioned; externally peer reviewed.

For peer review only

## REFERENCES

1. Potter P, Wolf L, Boxerman S, et al. Understanding the cognitive work of nursing in the acute care environment. *J Nurs Adm* 2005;35(7-8):327-35. [published Online First: 2005/08/04]
2. Skaugset LM, Farrell S, Carney M, et al. Can You Multitask? Evidence and Limitations of Task Switching and Multitasking in Emergency Medicine. *Ann Emerg Med* 2016;68(2):189-95. doi: 10.1016/j.annemergmed.2015.10.003 [published Online First: 2015/11/21]
3. Nemeth C, O'Connor M, Klock PA, et al. Advances in Patient Safety Cognitive Artifacts' Implications for Health Care Information Technology: Revealing How Practitioners Create and Share Their Understanding of Daily Work. In: Henriksen K, Battles JB, Marks ES, et al., eds. *Advances in Patient Safety: From Research to Implementation (Volume 2: Concepts and Methodology)*. Rockville (MD): Agency for Healthcare Research and Quality (US) 2005.
4. Tan J, Wen HJ, Awad N. Health care and services delivery systems as complex adaptive systems. *Commun ACM* 2005;48(5):36-44. doi: 10.1145/1060710.1060737
5. Antoniadis S, Passauer-Baierl S, Baschnegger H, et al. Identification and interference of intraoperative distractions and interruptions in operating rooms. *J Surg Res* 2014;188(1):21-9. doi: 10.1016/j.jss.2013.12.002 [published Online First: 2014/01/11]
6. Pype P, Krystallidou D, Deveugele M, et al. Healthcare teams as complex adaptive systems: Focus on interpersonal interaction. *Patient Educ Couns* 2017;100(11):2028-34. doi: <https://doi.org/10.1016/j.pec.2017.06.029>
7. Catchpole K, Wiegmann D. Understanding safety and performance in the cardiac operating room: from 'sharp end' to 'blunt end'. *BMJ quality & safety* 2012;21(10):807-9. doi: 10.1136/bmjqs-2012-001135 [published Online First: 2012/09/28]
8. den Boer KT, Dankelman J, Gouma DJ, et al. Peroperative analysis of the surgical procedure. *Surgical Endoscopy And Other Interventional Techniques* 2002;16(3):492-99. doi: 10.1007/s00464-001-8216-5
9. Blikkendaal MD, Driessen SR, Rodrigues SP, et al. Surgical flow disturbances in dedicated minimally invasive surgery suites: an observational study to assess its supposed superiority over conventional suites. *Surg Endosc* 2017;31(1):288-98. doi: 10.1007/s00464-016-4971-1 [published Online First: 2016/05/21]
10. Healey AN, Sevdalis N, Vincent CA. Measuring intra-operative interference from distraction and interruption observed in the operating theatre. *Ergonomics* 2006;49(5-6):589-604. doi: 10.1080/00140130600568899 [published Online First: 2006/05/24]
11. Woods D, Dekker, S, Cook, R, Johannesen, L. & Sarter, N. *Behind human error*. Farnham ;: Ashgate 2010.
12. Hollnagel E, Woods, D. & Leveson, N. *Resilience engineering: concepts and precepts*. : Aldershot: Ashgate Publishing. 2006.
13. Braithwaite J, Wears RL, Hollnagel E. Resilient health care: turning patient safety on its head. *Int J Qual Health Care* 2015;27(5):418-20. doi: 10.1093/intqhc/mzv063 [published Online First: 2015/08/22]
14. Forsberg HH, Muntlin Athlin A, von Thiele Schwarz U. Nurses' perceptions of multitasking in the emergency department: effective, fun and unproblematic (at



- 1  
2  
3 least for me) - a qualitative study. *Int Emerg Nurs* 2015;23(2):59-64. doi:  
4 10.1016/j.ienj.2014.05.002 [published Online First: 2014/06/24]
- 5 15. Weigl M, Muller A, Sevdalis N, et al. Relationships of multitasking, physicians' strain,  
6 and performance: an observational study in ward physicians. *Journal of patient*  
7 *safety* 2013;9(1):18-23. doi: 10.1097/PTS.0b013e31826b7b87 [published Online  
8 First: 2012/09/26]
- 9 16. Berg LM, Ehrenberg A, Florin J, et al. An observational study of activities and  
10 multitasking performed by clinicians in two Swedish emergency departments.  
11 *Eur J Emerg Med* 2012;19(4):246-51. doi: 10.1097/MEJ.0b013e32834c314a  
12 [published Online First: 2011/09/22]
- 13 17. Westbrook JI, Duffield C, Li L, et al. How much time do nurses have for patients? A  
14 longitudinal study quantifying hospital nurses' patterns of task time distribution  
15 and interactions with health professionals. *BMC Health Serv Res* 2011;11:319. doi:  
16 10.1186/1472-6963-11-319 [published Online First: 2011/11/25]
- 17 18. Murji A, Luketic L, Sobel ML, et al. Evaluating the effect of distractions in the  
18 operating room on clinical decision-making and patient safety. *Surg Endosc*  
19 2016;30(10):4499-504. doi: 10.1007/s00464-016-4782-4 [published Online  
20 First: 2016/02/21]
- 21 19. Walter SR, Li L, Dunsmuir WT, et al. Managing competing demands through task-  
22 switching and multitasking: a multi-setting observational study of 200 clinicians  
23 over 1000 hours. *BMJ quality & safety* 2014;23(3):231-41. doi: 10.1136/bmjqs-  
24 2013-002097 [published Online First: 2013/10/19]
- 25 20. Laxmisan A, Hakimzada F, Sayan OR, et al. The multitasking clinician: Decision-  
26 making and cognitive demand during and after team handoffs in emergency care.  
27 *Int J Med Inform* 2007;76(11-12):801-11. doi:  
28 <http://dx.doi.org/10.1016/j.ijmedinf.2006.09.019>
- 29 21. Poolton JM, Wilson MR, Malhotra N, et al. A comparison of evaluation, time pressure,  
30 and multitasking as stressors of psychomotor operative performance. *Surgery*  
31 2011;149(6):776-82. doi: 10.1016/j.surg.2010.12.005 [published Online First:  
32 2011/02/12]
- 33 22. Bellandi T, Cerri A, Carreras G, et al. Interruptions and multitasking in surgery: a  
34 multicentre observational study of the daily work patterns of doctors and nurses.  
35 *Ergonomics* 2017;1-8. doi: 10.1080/00140139.2017.1349934 [published Online  
36 First: 2017/07/13]
- 37 23. Chisholm CD, Collison EK, Nelson DR, et al. Emergency department workplace  
38 interruptions: are emergency physicians "interrupt-driven" and "multitasking"?  
39 *Acad Emerg Med* 2000;7(11):1239-43. [published Online First: 2000/11/10]
- 40 24. von Thiele Schwarz U, Hasson H, Muntlin Athlin A. Efficiency in the emergency  
41 department - A complex relationship between throughput rates and staff  
42 perceptions. *Int Emerg Nurs* 2016;29:15-20. doi: 10.1016/j.ienj.2016.07.003  
43 [published Online First: 2016/08/16]
- 44 25. Magrabi F, Li SY, Dunn AG, et al. Challenges in measuring the impact of interruption  
45 on patient safety and workflow outcomes. *Methods Inf Med* 2011;50(5):447-53.  
46 doi: 10.3414/me11-02-0003 [published Online First: 2011/07/28]
- 47 26. Westbrook JI, Coiera E, Dunsmuir WT, et al. The impact of interruptions on clinical  
48 task completion. *Quality & safety in health care* 2010;19(4):284-9. doi:  
49 10.1136/qshc.2009.039255 [published Online First: 2010/05/14]
- 50  
51  
52  
53  
54  
55  
56  
57  
58  
59  
60

- 1  
2  
3 27. Campbell G, Arfanis K, Smith AF. Distraction and interruption in anaesthetic practice.  
4 *Br J Anaesth* 2012;109(5):707-15. doi: 10.1093/bja/aes219 [published Online  
5 First: 2012/07/04]
- 6 28. Boehm-Davis DA, Remington R. Reducing the disruptive effects of interruption: a  
7 cognitive framework for analysing the costs and benefits of intervention  
8 strategies. *Accid Anal Prev* 2009;41(5):1124-9. doi: 10.1016/j.aap.2009.06.029  
9 [published Online First: 2009/08/12]
- 10 29. Wiegmann DA, ElBardissi AW, Dearani JA, et al. Disruptions in surgical flow and their  
11 relationship to surgical errors: An exploratory investigation. *Surgery*  
12 2007;142(5):658-65. doi: <http://dx.doi.org/10.1016/j.surg.2007.07.034>
- 13 30. Berg LM, Kallberg AS, Ehrenberg A, et al. Factors influencing clinicians' perceptions  
14 of interruptions as disturbing or non-disturbing: A qualitative study. *Int Emerg*  
15 *Nurs* 2016;27:11-6. doi: 10.1016/j.ienj.2016.01.003 [published Online First:  
16 2016/03/08]
- 17 31. Westbrook JI. Interruptions and multi-tasking: moving the research agenda in new  
18 directions. *BMJ quality & safety* 2014;23(11):877-9. doi: 10.1136/bmjqs-2014-  
19 003372 [published Online First: 2014/07/20]
- 20 32. Healey AN, Primus CP, Koutantji M. Quantifying distraction and interruption in  
21 urological surgery. *Quality & safety in health care* 2007;16(2):135-9. doi:  
22 10.1136/qshc.2006.019711 [published Online First: 2007/04/04]
- 23 33. Grundgeiger T, Sanderson P, MacDougall HG, et al. Interruption management in the  
24 intensive care unit: Predicting resumption times and assessing distributed  
25 support. *J Exp Psychol Appl* 2010;16(4):317-34. doi: 10.1037/a0021912
- 26 34. Anthony K, Wiencek C, Bauer C, et al. No interruptions please: impact of a No  
27 Interruption Zone on medication safety in intensive care units. *Crit Care Nurse*  
28 2010;30(3):21-9. doi: 10.4037/ccn2010473 [published Online First:  
29 2010/01/14]
- 30 35. Alvarez G, Coiera E. Interruptive communication patterns in the intensive care unit  
31 ward round. *Int J Med Inform* 2005;74(10):791-6. doi:  
32 10.1016/j.ijmedinf.2005.03.017 [published Online First: 2005/07/19]
- 33 36. Woloshynowych M, Davis R, Brown R, et al. Communication patterns in a UK  
34 emergency department. *Ann Emerg Med* 2007;50(4):407-13. doi:  
35 10.1016/j.annemergmed.2007.08.001 [published Online First: 2007/09/21]
- 36 37. Biron AD, Loiselle CG, Lavoie-Tremblay M. Work interruptions and their contribution  
37 to medication administration errors: an evidence review. *Worldviews Evid Based*  
38 *Nurs* 2009;6(2):70-86. doi: 10.1111/j.1741-6787.2009.00151.x [published  
39 Online First: 2009/05/06]
- 40 38. Ballermann MA, Shaw NT, Mayes DC, et al. Validation of the Work Observation  
41 Method By Activity Timing (WOMBAT) method of conducting time-motion  
42 observations in critical care settings: an observational study. *BMC Med Inform*  
43 *Decis Mak* 2011;11:32-32. doi: 10.1186/1472-6947-11-32
- 44 39. Berg LM, Kallberg AS, Goransson KE, et al. Interruptions in emergency department  
45 work: an observational and interview study. *BMJ quality & safety*  
46 2013;22(8):656-63. doi: 10.1136/bmjqs-2013-001967 [published Online First:  
47 2013/04/16]
- 48 40. Brixey JJ, Tang Z, Robinson DJ, et al. Interruptions in a level one trauma center: a case  
49 study. *Int J Med Inform* 2008;77(4):235-41. doi: 10.1016/j.ijmedinf.2007.04.006  
50 [published Online First: 2007/06/16]
- 51  
52  
53  
54  
55  
56  
57  
58  
59  
60

- 1  
2  
3 41. Sevdalis N, Healey AN, Vincent CA. Distracting communications in the operating  
4 theatre. *J Eval Clin Pract* 2007;13(3):390-4. doi: 10.1111/j.1365-  
5 2753.2006.00712.x [published Online First: 2007/05/24]
- 6 42. Zheng B, Martinec DV, Cassera MA, et al. A quantitative study of disruption in the  
7 operating room during laparoscopic antireflux surgery. *Surg Endosc*  
8 2008;22(10):2171-7. doi: 10.1007/s00464-008-0017-7 [published Online First:  
9 2008/07/16]
- 10 43. Yoong W, Khin A, Ramlal N, et al. Interruptions and distractions in the gynaecological  
11 operating theatre: irritating or dangerous? *Ergonomics* 2015;58(8):1314-9. doi:  
12 10.1080/00140139.2015.1005171 [published Online First: 2015/02/13]
- 13 44. Cohen TN, Cabrera JS, Sisk OD, et al. Identifying workflow disruptions in the  
14 cardiovascular operating room. *Anaesthesia* 2016;71(8):948-54. doi:  
15 10.1111/anae.13521 [published Online First: 2016/07/12]
- 16 45. Al-Hakim L. The impact of preventable disruption on the operative time for  
17 minimally invasive surgery. *Surg Endosc* 2011;25(10):3385-92. doi:  
18 10.1007/s00464-011-1735-9 [published Online First: 2011/05/19]
- 19 46. Persoon MC, Broos HJHP, Witjes JA, et al. The effect of distractions in the operating  
20 room during endourological procedures. *Surg Endosc* 2011;25(2):437-43. doi:  
21 10.1007/s00464-010-1186-8
- 22 47. Gillespie BM, Chaboyer W, Fairweather N. Interruptions and miscommunications in  
23 surgery: an observational study. *AORN J* 2012;95(5):576-90. doi:  
24 10.1016/j.aorn.2012.02.012 [published Online First: 2012/05/01]
- 25 48. Tiferes J, Hussein AA, Bisantz A, et al. The Loud Surgeon Behind the Console:  
26 Understanding Team Activities During Robot-Assisted Surgery. *J Surg Educ*  
27 2016;73(3):504-12. doi: 10.1016/j.jsurg.2015.12.009 [published Online First:  
28 2016/04/14]
- 29 49. Braithwaite J, Churruca, K, Ellis, L, Long, J, Clay-Williams, R, Damen, N, Herkes, J,  
30 Pomare, C & Ludlow, K. Complexity Science in Healthcare - Aspirations,  
31 Approaches, Applications and Accomplishments: A White Paper, 2017.
- 32 50. Gillespie BM, Chaboyer W, Fairweather N. Factors that influence the expected length  
33 of operation: results of a prospective study. *BMJ quality & safety* 2012;21(1):3-12.  
34 doi: 10.1136/bmjqs-2011-000169 [published Online First: 2011/10/18]
- 35 51. Weigl M, Antoniadis S, Chiapponi C, et al. The impact of intra-operative interruptions  
36 on surgeons' perceived workload: an observational study in elective general and  
37 orthopedic surgery. *Surg Endosc* 2015;29(1):145-53. doi: 10.1007/s00464-014-  
38 3668-6 [published Online First: 2014/07/06]
- 39 52. Nilsson U, Jaensson M. Anesthetic Nursing: Keep in Touch, Watch Over, and Be One  
40 Step Ahead. *J Perianesth Nurs* 2016;31(6):550-51. doi:  
41 10.1016/j.jopan.2016.09.005 [published Online First: 2016/12/10]
- 42 53. Andersson AE, Bergh I, Karlsson J, et al. Traffic flow in the operating room: an  
43 explorative and descriptive study on air quality during orthopedic trauma  
44 implant surgery. *Am J Infect Control* 2012;40(8):750-5. doi:  
45 10.1016/j.ajic.2011.09.015 [published Online First: 2012/01/31]
- 46 54. Westbrook JI, Ampt A. Design, application and testing of the Work Observation  
47 Method by Activity Timing (WOMBAT) to measure clinicians' patterns of work  
48 and communication. *Int J Med Inform* 2009;78 Suppl 1:S25-33. doi:  
49 10.1016/j.ijmedinf.2008.09.003 [published Online First: 2008/10/28]
- 50 55. Palmer G, 2nd, Abernathy JH, 3rd, Swinton G, et al. Realizing improved patient care  
51 through human-centered operating room design: a human factors methodology  
52  
53  
54  
55  
56  
57  
58  
59  
60

- 1  
2  
3 for observing flow disruptions in the cardiothoracic operating room.  
4 *Anesthesiology* 2013;119(5):1066-77. doi: 10.1097/ALN.0b013e31829f68cf  
5 [published Online First: 2013/07/03]
- 6 56. CHSSR. Work Observation Method By Activity Timing. A guide to the installation and  
7 use of WOMBAT V2.0. . Kensington, NSW: The University of New South Wales  
8 Australian Institute of Health Innovation, Faculty of Medicine, 2012.
- 9 57. Landis JR, Koch GG. The measurement of observer agreement for categorical data.  
10 *Biometrics* 1977;33(1):159-74. [published Online First: 1977/03/01]
- 11 58. McDonald S. Studying actions in context: a qualitative shadowing method for  
12 organizational research. *Qualitative Research* 2005;5(4):455-73. doi:  
13 10.1177/1468794105056923
- 14 59. Larcos G, Prgomet M, Georgiou A, et al. A work observation study of nuclear medicine  
15 technologists: interruptions, resilience and implications for patient safety. *BMJ*  
16 *quality & safety* 2016 doi: 10.1136/bmjqs-2016-005846 [published Online First:  
17 2016/10/22]
- 18 60. Lehnbohm EC, Li L, Prgomet M, et al. Little Things Matter: A Time and Motion Study of  
19 Pharmacists' Activities in a Paediatric Hospital. *Stud Health Technol Inform*  
20 2016;227:80-6. [published Online First: 2016/07/22]
- 21 61. Li L, Hains I, Hordern T, et al. What do ICU doctors do? A multisite time and motion  
22 study of the clinical work patterns of registrars. *Crit Care Resusc* 2015;17(3):159-  
23 66. [published Online First: 2015/08/19]
- 24 62. Macdonald LM. Expertise in Everyday Nurse-Patient Conversations: The Importance  
25 of Small Talk. *Global qualitative nursing research* 2016;3:2333393616643201.  
26 doi: 10.1177/2333393616643201 [published Online First: 2017/05/04]
- 27 63. Richardson LC, Lehnbohm EC, Baysari MT, et al. A time and motion study of junior  
28 doctor work patterns on the weekend: a potential contributor to the weekend  
29 effect? *Intern Med J* 2016;46(7):819-25. doi: 10.1111/imj.13120 [published  
30 Online First: 2016/04/21]
- 31 64. Gillespie BM, Gwinner K, Chaboyer W, et al. Team communications in surgery -  
32 creating a culture of safety. *J Interprof Care* 2013;27(5):387-93. doi:  
33 10.3109/13561820.2013.784243
- 34 65. Cook RI, Render M, Woods DD. Gaps in the continuity of care and progress on patient  
35 safety. *BMJ : British Medical Journal* 2000;320(7237):791-94.
- 36  
37  
38  
39  
40  
41  
42  
43  
44  
45  
46  
47  
48  
49  
50  
51  
52  
53  
54  
55  
56  
57  
58  
59  
60

1  
2  
3  
4  
5  
6  
7  
8  
9  
10  
11  
12  
13  
14  
15  
16  
17  
18  
19  
20  
21  
22  
23  
24  
25  
26  
27  
28  
29  
30  
31  
32  
33  
34  
35  
36  
37  
38  
39  
40  
41  
42  
43  
44  
45  
46  
47  
48  
49  
50  
51  
52  
53  
54  
55  
56  
57  
58  
59  
60

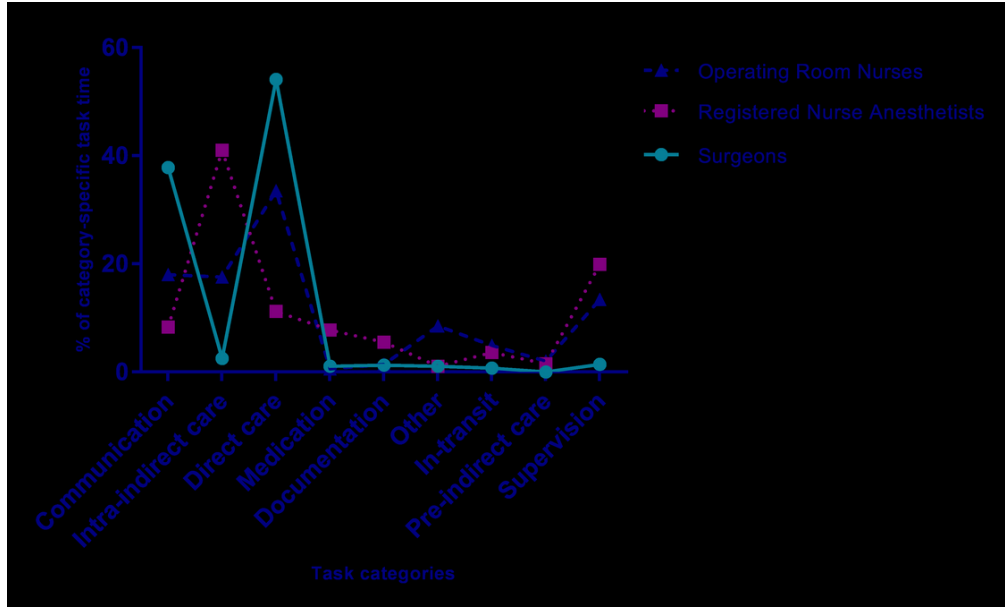

Figure 1. Distribution of the proportion of the observed time\* participants spent performing tasks in a particular category

\*Total observation time per profession was 66 hours each for ORNs and RNAs, whereas surgeons were observed for 37 hours

94x57mm (300 x 300 DPI)

**STROBE 2007 (v4) Statement—Checklist of items that should be included in reports of *cross-sectional studies*.**

| Section/Topic                | Item # | Recommendation                                                                                                                                                                       | Reported on page #                      |
|------------------------------|--------|--------------------------------------------------------------------------------------------------------------------------------------------------------------------------------------|-----------------------------------------|
| <b>Title and abstract</b>    | 1      | (a) Indicate the study's design with a commonly used term in the title or the abstract                                                                                               | #1                                      |
|                              |        | (b) Provide in the abstract an informative and balanced summary of what was done and what was found                                                                                  | #2                                      |
| <b>Introduction</b>          |        |                                                                                                                                                                                      |                                         |
| Background/rationale         | 2      | Explain the scientific background and rationale for the investigation being reported                                                                                                 | #4 - #5                                 |
| Objectives                   | 3      | State specific objectives, including any prespecified hypotheses                                                                                                                     | #6                                      |
| <b>Methods</b>               |        |                                                                                                                                                                                      |                                         |
| Study design                 | 4      | Present key elements of study design early in the paper                                                                                                                              | #7                                      |
| Setting                      | 5      | Describe the setting, locations, and relevant dates, including periods of recruitment, exposure, follow-up, and data collection                                                      | #7 - #9                                 |
| Participants                 | 6      | (a) Give the eligibility criteria, and the sources and methods of selection of participants                                                                                          | #9                                      |
| Variables                    | 7      | Clearly define all outcomes, exposures, predictors, potential confounders, and effect modifiers. Give diagnostic criteria, if applicable                                             | #5, not fully applicable for this study |
| Data sources/<br>measurement | 8*     | For each variable of interest, give sources of data and details of methods of assessment (measurement). Describe comparability of assessment methods if there is more than one group | #6, not fully applicable for this study |
| Bias                         | 9      | Describe any efforts to address potential sources of bias                                                                                                                            | #19                                     |
| Study size                   | 10     | Explain how the study size was arrived at                                                                                                                                            | #9                                      |
| Quantitative variables       | 11     | Explain how quantitative variables were handled in the analyses. If applicable, describe which groupings were chosen and why                                                         | #10                                     |
| Statistical methods          | 12     | (a) Describe all statistical methods, including those used to control for confounding                                                                                                | #10                                     |
|                              |        | (b) Describe any methods used to examine subgroups and interactions                                                                                                                  | Not applicable for this study           |
|                              |        | (c) Explain how missing data were addressed                                                                                                                                          | Missing data were                       |

|                   |     |                                                                                                                                                                                                              |                                                  |
|-------------------|-----|--------------------------------------------------------------------------------------------------------------------------------------------------------------------------------------------------------------|--------------------------------------------------|
|                   |     |                                                                                                                                                                                                              | treated as missing, and not imputed or averaged. |
|                   |     | (d) If applicable, describe analytical methods taking account of sampling strategy                                                                                                                           | Not applicable for this study                    |
|                   |     | (e) Describe any sensitivity analyses                                                                                                                                                                        | Not applicable for this study                    |
| <b>Results</b>    |     |                                                                                                                                                                                                              |                                                  |
| Participants      | 13* | (a) Report numbers of individuals at each stage of study—eg numbers potentially eligible, examined for eligibility, confirmed eligible, included in the study, completing follow-up, and analysed            | #11                                              |
|                   |     | (b) Give reasons for non-participation at each stage                                                                                                                                                         | #9                                               |
|                   |     | (c) Consider use of a flow diagram                                                                                                                                                                           | Not applicable for this study                    |
| Descriptive data  | 14* | (a) Give characteristics of study participants (eg demographic, clinical, social) and information on exposures and potential confounders                                                                     | #11                                              |
|                   |     | (b) Indicate number of participants with missing data for each variable of interest                                                                                                                          | Not applicable for this study                    |
| Outcome data      | 15* | Report numbers of outcome events or summary measures                                                                                                                                                         | #11-#15                                          |
| Main results      | 16  | (a) Give unadjusted estimates and, if applicable, confounder-adjusted estimates and their precision (eg, 95% confidence interval). Make clear which confounders were adjusted for and why they were included | #10                                              |
|                   |     | (b) Report category boundaries when continuous variables were categorized                                                                                                                                    | Not applicable for this study                    |
|                   |     | (c) If relevant, consider translating estimates of relative risk into absolute risk for a meaningful time period                                                                                             | Not applicable for this study                    |
| Other analyses    | 17  | Report other analyses done—eg analyses of subgroups and interactions, and sensitivity analyses                                                                                                               | Not applicable for this study                    |
| <b>Discussion</b> |     |                                                                                                                                                                                                              |                                                  |
| Key results       | 18  | Summarise key results with reference to study objectives                                                                                                                                                     | #16                                              |
| Limitations       | 19  | Discuss limitations of the study, taking into account sources of potential bias or imprecision. Discuss both direction and magnitude of any potential bias                                                   | #19-#20                                          |
| Interpretation    | 20  | Give a cautious overall interpretation of results considering objectives, limitations, multiplicity of analyses, results from                                                                                | #16-#19                                          |

|                          |    |                                                                                                                                                               |           |
|--------------------------|----|---------------------------------------------------------------------------------------------------------------------------------------------------------------|-----------|
|                          |    | similar studies, and other relevant evidence                                                                                                                  |           |
| Generalisability         | 21 | Discuss the generalisability (external validity) of the study results                                                                                         | #19 - #20 |
| <b>Other information</b> |    |                                                                                                                                                               |           |
| Funding                  | 22 | Give the source of funding and the role of the funders for the present study and, if applicable, for the original study on which the present article is based | #20       |

\*Give information separately for cases and controls in case-control studies and, if applicable, for exposed and unexposed groups in cohort and cross-sectional studies.

**Note:** An Explanation and Elaboration article discusses each checklist item and gives methodological background and published examples of transparent reporting. The STROBE checklist is best used in conjunction with this article (freely available on the Web sites of PLoS Medicine at <http://www.plosmedicine.org/>, Annals of Internal Medicine at <http://www.annals.org/>, and Epidemiology at <http://www.epidem.com/>). Information on the STROBE Initiative is available at [www.strobe-statement.org](http://www.strobe-statement.org).



# BMJ Open

## Tasks, multitasking and interruptions among the surgical team in an operating room: a prospective observational study

|                                 |                                                                                                                                                                                                                                                                                                                                                                                                                                                                                                                                                                                                                                                                                                                                                                                                                                                                                                                                                                                                                                                                                                                                                               |
|---------------------------------|---------------------------------------------------------------------------------------------------------------------------------------------------------------------------------------------------------------------------------------------------------------------------------------------------------------------------------------------------------------------------------------------------------------------------------------------------------------------------------------------------------------------------------------------------------------------------------------------------------------------------------------------------------------------------------------------------------------------------------------------------------------------------------------------------------------------------------------------------------------------------------------------------------------------------------------------------------------------------------------------------------------------------------------------------------------------------------------------------------------------------------------------------------------|
| Journal:                        | <i>BMJ Open</i>                                                                                                                                                                                                                                                                                                                                                                                                                                                                                                                                                                                                                                                                                                                                                                                                                                                                                                                                                                                                                                                                                                                                               |
| Manuscript ID                   | bmjopen-2018-026410.R1                                                                                                                                                                                                                                                                                                                                                                                                                                                                                                                                                                                                                                                                                                                                                                                                                                                                                                                                                                                                                                                                                                                                        |
| Article Type:                   | Research                                                                                                                                                                                                                                                                                                                                                                                                                                                                                                                                                                                                                                                                                                                                                                                                                                                                                                                                                                                                                                                                                                                                                      |
| Date Submitted by the Author:   | 10-Jan-2019                                                                                                                                                                                                                                                                                                                                                                                                                                                                                                                                                                                                                                                                                                                                                                                                                                                                                                                                                                                                                                                                                                                                                   |
| Complete List of Authors:       | Göras, Camilla; Örebro University, Faculty of Medicine and Health, School of Health Sciences<br>Olin, Karolina; Karolinska Institutet, Medical Management Centre, Dept of Learning, Informatics, Management and Ethics (LIME); Turku University Hospital , Administration Centre<br>Unbeck, Maria; Karolinska Institutet Department of Molecular Medicine and Surgery<br>Pukk Harenstam, Karin; Karolinska Universitetssjukhuset, Astrid Lindgren's Children's Hospital; Karolinska Institutet, Medical Management Centre, Dept. of Learning, Informatics, Management and Ethics (LIME)<br>Ehrenberg, Anna ; Dalarna University, Centre for Clinical Research<br>Tessma, Mesfin; Karolinska Institutet, Medical Management Centre, Dept of Learning, Informatics, Management and Ethics (LIME)<br>Nilsson, Ulrica; Karolinska Institutet, Department of Neurobiology, Care Sciences and Society, Karolinska Institutet Perioperative Medicine and Intensive Care<br>Ekstedt, Mirjam; Karolinska Institutet, Medical Management Centre, Dept of Learning, Informatics, Management and Ethics (LIME);<br>Linneuniversitet, School of Health and Caring Sciences |
| <b>Primary Subject Heading</b>: | Surgery                                                                                                                                                                                                                                                                                                                                                                                                                                                                                                                                                                                                                                                                                                                                                                                                                                                                                                                                                                                                                                                                                                                                                       |
| Secondary Subject Heading:      | Anaesthesia                                                                                                                                                                                                                                                                                                                                                                                                                                                                                                                                                                                                                                                                                                                                                                                                                                                                                                                                                                                                                                                                                                                                                   |
| Keywords:                       | Complexity, Multitasking, Interruptions, Patient Safety, Operating room                                                                                                                                                                                                                                                                                                                                                                                                                                                                                                                                                                                                                                                                                                                                                                                                                                                                                                                                                                                                                                                                                       |
|                                 |                                                                                                                                                                                                                                                                                                                                                                                                                                                                                                                                                                                                                                                                                                                                                                                                                                                                                                                                                                                                                                                                                                                                                               |

SCHOLARONE™  
Manuscripts

## Tasks, multitasking and interruptions among the surgical team in an operating room: a prospective observational study

Corresponding author: Karolina Olin [karolina.olin@ki.se](mailto:karolina.olin@ki.se) ; Medical Management Centre, LIME, Tomtebodavägen 18 A, 17177 Stockholm, Sweden, +358(0)400850513

Camilla Göras\*, RNA, MSc, PhD student<sup>1,2,3</sup>, Karolina Olin\*, RNA, MSc, PhD student<sup>4,5</sup>, Maria Unbeck, RN, PhD<sup>6,7</sup>, Karin Pukk-Härenstam MD PHD<sup>4,8</sup>, Anna Ehrenberg, RN, Professor<sup>9</sup>, Mesfin Kassaye Tessma, MD, MPH<sup>4</sup>, Ulrica Nilsson, RNA, Professor<sup>10</sup> Mirjam Ekstedt, RN, Professor<sup>4,11</sup>

<sup>1</sup> School of Health Sciences, Faculty of Medicine and Health, Örebro University, Örebro, Sweden

<sup>2</sup> Department of Anaesthesia and Intensive Care Unit, Falu Hospital, Falun, Sweden

<sup>3</sup> Centre for Clinical Research, Falun, Dalarna, Sweden

<sup>4</sup> Department of Learning, Informatics, Management and Ethics, Karolinska Institutet, Stockholm, Sweden

<sup>5</sup> Development Centre, Turku University Hospital, Turku, Finland

<sup>6</sup> Trauma and Reparative Medicine Theme, Karolinska University Hospital, Stockholm, Sweden

<sup>7</sup> Department of Molecular Medicine and Surgery, Karolinska Institutet, Stockholm, Sweden

<sup>8</sup> Paediatric Emergency Department, Karolinska University Hospital, Stockholm, Sweden

<sup>9</sup> School of Education, Health and Social Studies, Dalarna University, Falun, Sweden

<sup>10</sup> Department of Neurobiology, Care Sciences and Society, Karolinska Institutet Perioperative Medicine and Intensive Care, Karolinska University Hospital, Stockholm, Sweden

<sup>11</sup> Department of Health and Caring Sciences, Linnaeus University, Kalmar/Växjö Sweden.

\*Both authors contributed equally to this work

### Email addresses and phone numbers:

CG: [camilla.goras@outlook.com](mailto:camilla.goras@outlook.com), +46(0) 23492101

KO: [karolina.olin@ki.se](mailto:karolina.olin@ki.se), +358(0) 400850513

MU: [maria.unbeck@sll.se](mailto:maria.unbeck@sll.se), +46(0) 851770000

KPH: [karin.pukk-harenstam@sll.se](mailto:karin.pukk-harenstam@sll.se), +46(0) 708558896

AE: [aeh@du.se](mailto:aeh@du.se), +46(0) 23778472

MKT: [mesfin.tessma@ki.se](mailto:mesfin.tessma@ki.se), + 46(0) 8524 837 94

UN: [ulrica.nilsson@ki.se](mailto:ulrica.nilsson@ki.se), +46(0) 8524 838 22

ME: [mirjam.ekstedt@ki.se](mailto:mirjam.ekstedt@ki.se), +46(0)703185691

*Words:* 4706 words (excluding: title page, abstract, references, tables and figures)

## ABSTRACT

**Objectives** The work context of the operating room (OR) is considered complex and dynamic with high cognitive demands. A multidimensional view of the complete pre- and intraoperative work process of the surgical team in the OR has been sparsely described. The aim of this study was to describe the type and frequency of tasks, multitasking, interruptions and their causes during surgical procedures from a multi-dimensional perspective on the surgical team in the OR.

**Design** Prospective observational study, using the Work Observation Method By Activity Timing (WOMBAT) tool.

**Setting** An OR department at a county hospital in Sweden.

**Participants** Operating room nurses (ORNs) (n=10), registered nurse anesthetists (RNAs) (n=8) and surgeons (n=9).

**Results** The type, frequency and time spent on specific tasks, multitasking and interruptions were measured. From a multidimensional view, the surgical team performed 64 tasks per hour. Communication represented almost half (45.7%) of all observed tasks. Concerning task time, direct care dominated the surgeons' and ORNs' intra-operative time, while in RNAs' work it was intra-indirect care. In total, 48.2% of time was spent in multitasking and was most often observed in ORNs' and surgeons' work during communication. Interruptions occurred 3.0 per hour, and the largest proportion, 26.7%, was related to equipment. Interruptions were most commonly followed by professional communication.

**Conclusions** The surgical team constantly dealt with multitasking and interruptions, both with potential impact on workflow and patient safety. Interruptions were commonly followed by professional communication, which may reflect the interactions and constant adaptations in a complex adaptive system. Future research should focus on understanding the complexity within the system, on the design of different work processes, and on how teams meet the challenges of a complex adaptive systems.

Words: 279

**Keywords:** Complexity, multitasking, interruptions, patient safety, operating room

**Ethical registration number**

2016/264

## STRENGTHS AND LIMITATIONS OF THIS STUDY

- This study adds to the knowledge of how complex work is performed in the operating room by providing a multidimensional view of the complete pre- and intraoperative work process of the surgical team.
- The data collection tool used, WOMBAT, employs a structured observation protocol with an operationalized definition of “interruption”, which may reduce the risk of potential measurement errors.
- Even though the assistant surgeon, anesthesiologist and the circulating nurse were observed indirectly when interacting with the observed operating room nurse, registered nurse anesthetist or surgeon, the nature of performed tasks and how often they were interrupted was not recorded, which may be considered a limitation, as the whole surgical team is not represented in this study.
- Some participants were also observed on several occasions, which may imply a potential risk for a systematic bias.
- This study was performed at one hospital only and the observations did not include night shifts, weekend shifts or procedures conducted on Fridays, which may limit the representativeness for different work shifts and may reduce the generalizability of the findings.

## BACKGROUND

Clinical work in surgery is often fast-paced, demanding and time- and resource-constrained. It requires specific technical and cognitive skills<sup>1</sup> and involves multiple activities such as organizing care, responding to patients' changing conditions, anticipating needs, and performing surgical procedures.<sup>1</sup>

<sup>2</sup> An operating room (OR) can be considered a complex adaptive system (CAS),<sup>3,4</sup> which requires that professionals act and communicate, adapt, learn and self-organize over time.<sup>5</sup> It is an interconnected and dynamic environment<sup>3</sup> with an inherent potential for distractions and interruptions.<sup>1,6</sup>

The members of the surgical team are essential actors in the OR,<sup>7</sup> focused on providing safe surgical care. In addition, components such as a suitable environment, functioning equipment, drugs, and disposable items are needed to support the intra-operative process.<sup>8</sup> The work process of the surgical team in the OR is mainly described through the surgical procedure and its phases,<sup>9</sup> sometimes including the phases of anesthesia.<sup>10</sup> The OR context has considerable potential for interruptions that may interfere with the work of the surgical team.<sup>6,11</sup> Good outcomes often rely on individuals' and teams' skills in adjusting and adapting to unexpected events and rapidly changing situations, using communication and interaction, i.e., resilient performance.<sup>12,13</sup> Understanding resilience requires a deep understanding of the work as it is actually carried out, rather than how it is usually presented in standardized models.<sup>14</sup>

Multitasking can be defined as managing multiple tasks simultaneously.<sup>15,16</sup> However, inconsistencies in definitions and methods make it difficult to make comparisons between studies.<sup>16</sup> Multitasking is one strategy used to cope with increased work density<sup>17,18</sup> and prioritize between tasks.<sup>19</sup> It is often expressed as an integral part of daily practices and a skill often used by professionals, especially in the emergency department (ED).<sup>17</sup> To ensure immediate communication and information seeking, multitasking can be appropriate.<sup>20</sup> Professionals working in emergency care settings usually do not perceive multitasking as stressful, but see it as related to safe and efficient task completion.<sup>21</sup>

Previous research has showed that physicians are frequently required to multitask, which may affect their work process and potentially impact on patient safety.<sup>22</sup> A recent study showed associations between multitasking and increased rates of prescription errors among physicians in the ED.<sup>23</sup> It has also been reported that even though nurses manage multitasking and interruptions well, errors still occur.<sup>24</sup> In addition, professionals in the OR are expected to multitask by being available through pagers and telephones during the surgical procedures.<sup>25</sup> Research on multitasking has mostly been conducted in EDs, hospital wards and intensive care units (ICUs), primarily involving nurses and

1  
2  
3 physicians, and the results show that multitasking occurs frequently.<sup>18 22 26 27</sup> However, multitasking in  
4 the OR has been studied only rarely.<sup>28</sup> Although multitasking is common, knowledge about the impact  
5 on patient safety and outcomes is sparse.<sup>16</sup>  
6  
7  
8  
9

10 Interruption is a complex phenomenon, and can be described as a process of suspension of a current  
11 (primary) task to attend to and work on another (secondary) task. Interruptions can involve multiple  
12 interconnected components, such as equipment, organizational factors, task characteristics and  
13 external environmental conditions.<sup>29</sup> In research, different terms such as interruption, disruption,  
14 disturbance, and distraction are used interchangeably. Interruptions have been defined in a variety of  
15 ways, which is a challenge to comparisons between studies.<sup>30 31</sup> Interruptions may contribute to task  
16 incompleteness,<sup>15 32-34</sup> loss of attention, medication errors<sup>35</sup> and gaps in continuity of care.<sup>36</sup> Previous  
17 work has mostly focused on interruptions from a negative perspective, where minimizing or preventing  
18 interruptions has been the main concern.<sup>31</sup> Associations have been found between interruptions and  
19 medication prescription errors in the ED.<sup>23</sup> However, interventions to reduce interruptions have shown  
20 limited effectiveness.<sup>37</sup> Healthcare processes affected by interruptions can be of diverse nature.<sup>29 30</sup>  
21 Recent research claims that interruptions may also have a positive impact on patient safety when they  
22 entail, for example, obtaining advice from a colleague, or receiving timely<sup>38</sup> and relevant information  
23 about a patient.<sup>39</sup> Several studies have described communication as a source of interruptions.<sup>40 41</sup>  
24 Additionally, in the OR, communication has been described in terms of being irrelevant or  
25 miscommunication.<sup>6 10 11 42 43</sup> Since communication is a relevant task that supports interactions in a  
26 CAS,<sup>5</sup> it should be seen both as a means of supporting clinical work and as a source of interruptions.  
27  
28  
29  
30  
31  
32  
33  
34  
35  
36  
37  
38  
39

40 The frequency, duration,<sup>44 45</sup> sources or causes of interruptions have been studied in the OR.<sup>6 10 46</sup>  
41 Outcomes of interruptions have been studied in terms of effects on professionals' levels of  
42 distraction,<sup>44</sup> engagement,<sup>11 47</sup> delay,<sup>45</sup> and interference in the work process.<sup>6</sup> These findings reveal  
43 interruptions to be a predominantly negative phenomenon in the OR. Studies in the OR with a team  
44 perspective and a coherent definition are few.<sup>11 48</sup>  
45  
46  
47  
48  
49

50 To conclude, previous research has studied the work process of the surgical team mainly during surgery  
51 and anesthesia. The OR is a CAS, where interruptions with diverse nature frequently occur and  
52 multitasking is expected, which may affect workflow and patient safety. However, multitasking with a  
53 team perspective has not been studied in the OR. Thus, there is a lack of knowledge regarding the  
54 multi-dimensional view of the pre- and intraoperative work process in the OR focusing on all  
55 performed tasks, multitasking, interruptions and their causes, i.e., how the work is actually done in the  
56 surgical team. Therefore, the aim of this study was to describe the type and frequency of tasks,  
57  
58  
59  
60

1  
2  
3 multitasking, interruptions and their causes from a multi-dimensional perspective for the surgical team  
4 in the OR.  
5

## 6 7 **METHODS**

### 8 9 **Setting and sample**

10  
11  
12 This prospective observational study was conducted in a central OR department at a local county  
13 hospital in Sweden. The hospital had two surgical wards, with a total of 38 beds. For general surgery,  
14 there was one department for ambulatory surgery and one central OR department. During 2016, a  
15 total of 4,118 patients underwent surgery at this hospital. The central OR department consisted of six  
16 rooms that served both acute and elective orthopedic and surgical patients. In connection to each OR,  
17 there was a preparation room where the registered nurse anesthetist (RNA) and/or the  
18 anesthesiologist sometimes prepared patients for surgery. Some medications were also stored in this  
19 area.  
20  
21

22  
23  
24  
25  
26  
27 As in many other countries, surgical teams in ORs in Sweden commonly comprise six professionals,  
28 namely: RNA,<sup>49</sup> anesthesiologist, operating surgeon and assisting surgeon, operating room nurse (ORN)  
29 and a circulating nurse (commonly a licensed practical nurse).<sup>6</sup> For the observations we selected a  
30 convenience sample of scheduled general surgical procedures from a case list. To provide coverage  
31 and representativeness of common procedures performed at the department across weekdays (Mon–  
32 Thu) and shifts (07:30–21:00 hours) the sample included acute and elective general surgical procedures  
33 performed on adults. Since the number of people present in the OR is associated with risk for  
34 healthcare-associated infections during orthopaedic procedures,<sup>50</sup> such procedures were excluded, as  
35 were night shifts. The professionals were informed about the study during workplace meetings and  
36 invited to participate.  
37  
38  
39  
40  
41  
42  
43  
44

### 45 46 **Patient and public involvement**

47  
48 Patients or the public were not involved in this study.  
49

### 50 51 **Tool and definitions**

52  
53 The Work Observation Method By Activity Timing (WOMBAT) software with a portable touchscreen  
54 tablet (Lenovo 7 Tab3) was used to collect data. The tool includes different dimensions of work, as well  
55 as specific categories of task and subcategories within these dimensions,<sup>51</sup> which were customized by  
56 the researchers to fit the context of this study. Information recorded for each observed task included  
57 the dimensions: task type (What?), with whom (Who?) the participant interacted (e.g. other members  
58  
59  
60

of the surgical team), resources (How?) used (e.g. telephone), multitasking and the observable cause (Why?) of any interruptions that occurred. Tasks performed by the participants were recorded by selecting the predefined categories. A clear statement of definitions being used is considered crucial.<sup>30</sup> The concepts used in this study, with associated operationalized definitions, are presented in Table 1.

Table 1. Used concepts and their operational definitions

| Concepts                | Operational definitions                                                                                                                                                                                  |
|-------------------------|----------------------------------------------------------------------------------------------------------------------------------------------------------------------------------------------------------|
| Multitasking            | When a member of the surgical team carried out observable multiple tasks simultaneously e.g. talking to a colleague while preparing medication                                                           |
| Interruption            | When a member of the surgical team ceased a current task because of an observable external stimulus e.g. paused to prepare an infusion when a surgeon asks to change the position of the operating table |
| Cause of interruptions  | Describes the cause to an observable interruption                                                                                                                                                        |
| Interrupting task       | Task that interrupts an ongoing task or task(s)                                                                                                                                                          |
| Interrupted task        | The ongoing task that is being interrupted                                                                                                                                                               |
| Task after interruption | Tasks initiated after an interruption                                                                                                                                                                    |

### Adaptation of the WOMBAT tool to the OR context

In order to ensure validity, ORNs', RNAs' and surgeons' work tasks were first mapped and then discussed with one expert from each targeted profession. The researchers – who later carried out the observations – discussed representation of dimensions, categories, subcategories, multitasking, causes of interruptions in WOMBAT, until consensus was reached over mutually exclusive definitions (Table 2). Common causes of interruptions in the OR have been presented in previous taxonomies and frameworks,<sup>6 46 52</sup> and based on the existing literature and pilot observations, categories were developed for observations of interruptions using WOMBAT. These categories were later confirmed by field notes on examples of the observable cause to an interruption. To verify the correct programming of WOMBAT, written dummy cases were developed and tested. Prior to actual data collection, researchers conducted approximately 15 hours each of pilot testing of WOMBAT based on observations of the three professions, during 12 surgical procedures. The categories, subcategories and their task classifications were then once more refined and adapted to the WOMBAT tool. For example, indirect care was divided in two phases (pre and intra) in order to better identify the preparatory phase before patient's arrival at the OR. To further clarify the cause of an interruption, broad categories were programmed under an additional dimension: "Why?".



**Table 2.** Task classifications for the surgical team

| Task categories and subcategories                | Definitions                                                           | Included activities                                                                                                                                 |
|--------------------------------------------------|-----------------------------------------------------------------------|-----------------------------------------------------------------------------------------------------------------------------------------------------|
| <b>Pre-indirect care</b>                         | Tasks indirectly related to patient care prior to patient arrival     |                                                                                                                                                     |
| Disinfect                                        |                                                                       | Pre-operative hand washing/disinfection                                                                                                             |
| Organize/arrange                                 |                                                                       | Preparing equipment                                                                                                                                 |
| Control/Count                                    |                                                                       | Checking equipment, counting instruments, swabs                                                                                                     |
| Read                                             |                                                                       | Reading/searching patient information                                                                                                               |
| Clean                                            |                                                                       | Arranging and cleaning                                                                                                                              |
| Protect                                          |                                                                       | Applying sterile gown, gloves, apron                                                                                                                |
| <b>Intra-indirect care</b>                       | Tasks indirectly related to patient care, when the patient is present |                                                                                                                                                     |
| Observe/monitor                                  |                                                                       | Monitoring patients' vital parameters                                                                                                               |
| Disinfect                                        |                                                                       | Hand washing/disinfection                                                                                                                           |
| Organize/arrange                                 |                                                                       | Preparing equipment                                                                                                                                 |
| Control/count                                    |                                                                       | Controlling equipment, counting instruments, swabs                                                                                                  |
| Read                                             |                                                                       | Reading and reviewing patient information                                                                                                           |
| Clean                                            |                                                                       | Arranging and cleaning                                                                                                                              |
| Protect                                          |                                                                       | Applying protective apron or gloves                                                                                                                 |
| <b>Direct care</b>                               | Tasks directly related to patient care                                |                                                                                                                                                     |
| Skin disinfection                                |                                                                       | Disinfecting the incision area, including drying time                                                                                               |
| Drape                                            |                                                                       | Draping the patient                                                                                                                                 |
| Assist                                           |                                                                       | Assisting another professional                                                                                                                      |
| Instrumentation                                  |                                                                       | Instrumentation with surgeon                                                                                                                        |
| Perform invasive surgical/ anesthetic procedures |                                                                       | Performing the procedure/intubation, inserting intravenous lines                                                                                    |
| Perform patient care                             |                                                                       | Communicating with the patient, mobilizing of the patient, dressing the wound, moving the patient to the bed                                        |
| <b>Medication</b>                                | Tasks related to providing medication to a patient                    |                                                                                                                                                     |
| Prepare                                          |                                                                       | Reading prescriptions, preparing syringes                                                                                                           |
| Administer                                       |                                                                       | Giving medication to the patient                                                                                                                    |
| Document                                         |                                                                       | Documenting medication care                                                                                                                         |
| Communicate                                      |                                                                       | Discussing medication care and prescriptions, asking for clarification                                                                              |
| <b>Documentation</b>                             | Any recording of patient information on paper or computer             |                                                                                                                                                     |
| <b>Communication</b>                             | Any work-related or social discussion with another staff member       |                                                                                                                                                     |
| Professional                                     |                                                                       | Discussions related to the procedure, planning the care of the patient, paging surgeon or anesthesiologist, reporting, completing the WHO checklist |
| Irrelevant                                       |                                                                       | Case-irrelevant communication                                                                                                                       |
| <b>Supervision</b>                               | Any activity focused on teaching or education                         | <i>(Note: When supervision is taking place, all other tasks are "multitasking".)</i>                                                                |
| <b>Other</b>                                     | Any other task not included above                                     | For example: waiting for a colleague or a decision, when there is no communication                                                                  |
| <b>In transit</b>                                | Any movement between rooms                                            | Transferring the patient into and out of the room<br>Getting equipment needed                                                                       |

### Inter-rater reliability

Inter-rater reliability (IRR) was tested during pilot observations, with the researchers independently observing the same participant for 30 minutes.<sup>53</sup> Situations that were difficult to record using the pre-defined task definitions were discussed between sessions to achieve agreement in subsequent observations. During the last three pilot observations, adequate Cohen's kappa value ( $\geq 0.81$ )<sup>53</sup> on most observed tasks were achieved (0.85 for indirect care (pre and intra), 0.87 for direct care, 0.93 for medication and 0.82 for communication).<sup>54</sup> During the pilot observations only few interruptions occurred, so calculating kappa was not feasible. However, the observers had identified the interruptions, interrupting task and their causes similarly. Additionally, IRR was assessed using the intra-class correlation (ICC). The proportions of tasks between observers, as well as proportions of time within task categories were examined.<sup>23</sup> Two-way mixed model was used to measure ICC and it was 0.96 (95% CI, 0.83 to 0.99) indicating a high IRR.

### Data collection

Observations were performed between 07:30 and 21:00 on Monday to Thursday from 14 November to 15 December 2016. Prior to the observation sessions, professionals involved in selected surgical procedures provided informed consent and were informed that they might withdraw from the study at any time. Consent was not obtained from patients and other professionals, as they were not targeted in the observations. However, they were informed orally about the study and were given the option to deny observations of the procedure they were participating in. If this occurred prior to or during a surgical procedure the observation should stop and already collected data would be excluded from the study. However, this did not occur. Observations of ORNs and RNAs started when the participants began to plan and prepare for the surgical procedure and continued until the patient had left the OR. The RNAs were also observed in the preparation room, which was adjacent to the OR. Observation of the surgeon started when they entered the OR and ended when they left the OR after the surgical procedure. Thus, the surgeons were observed for a total of 37 hours whereas ORNs and RNAs were observed for 66 hours each. The researcher followed the same participant unobtrusively during the whole surgical procedure, registering tasks the participant performed, with whom and how.<sup>55</sup> When an interruption occurred, manifest causes (what could be observed) of the interruption were registered in WOMBAT. The underlying cause, often verbally expressed, was written down in the field notes, as were examples of what the observable cause could be. To complete the structured observations with contextual factors such as testing of new medical-technical equipment, field notes were made during and directly after the observations.

## Ethics

This study was conducted in accordance with international research standards under the Declaration of Helsinki and was approved by the Regional Ethical Review Board in Uppsala, Sweden (No. 2016/264).

## Data analysis

Descriptive statistics were used to determine the total observation time, number and proportion of tasks, proportion of category-specific task time and multitasking time based on total observed time per profession and interruption rate per hour of the surgical team. Calculation of proportion of task, summation of time on task, proportion of time on task, and confidence interval (CI) were calculated based on the WOMBAT analysis guide, with slight modifications for the latter. In the literature, some have reported a large sample approximation for calculating the CI.<sup>56</sup> Considering the problem of interval estimation of proportion and the erratic behavior of the large sample approximation (the Wald interval) we have employed the Wilson's confidence interval. The CI from the Wald interval often has inadequate coverage, particularly for small sample size and values of proportions close to 0 or 1, while the Wilson interval is appropriate for both smaller and larger sample sizes and provides more reliable coverage than other alternatives. The Wilson interval uses the estimated standard error instead of the "null standard error".<sup>57</sup> Since our data include both small and large sample sizes and lower and higher proportions, we felt that the Wilson's interval as a viable alternative for interval estimate of the proportions. Analysis of the data was performed using Microsoft Excel 2016 and the Statistical Package for Social Sciences, SPSS version 21.

## RESULTS

During the data collection period, 199 procedures in general surgery were performed at the OR department and 46 (23.1%) of these were observed. The 46 surgical procedures included in the data collection contained 78 unique recorded observation sessions, including 26 observations per profession. ORNs and RNAs were observed for 66 hours each and surgeons were observed for 37 hours, with a total time of 169 observation hours. Of the 46 surgical procedures, four were acute and the rest were elective. According to type of surgery, 28 of these procedures were laparoscopic and 18 were conducted with open surgery. The surgical procedures, from incision until wound closure, lasted between 38 minutes and 3 hours and 15 minutes (mean time 42 minutes). General anesthesia was administered in 42 of the 46 (91.3%) surgical procedures and regional anesthesia in four (8.7%). Demographic data for the participants is presented in Table 3.

**Table 3.** Demographic data for operating room nurses (ORNs), registered nurse anesthetists (RNAs), and surgeons during the observed surgical procedures (n=26), by profession

| Profession   | Observation time, hours | Number of observed participants | Mean age, years (range) | Gender of the participant, female/male, number | Mean experience as specialist, years (range) | Mean experience at the participating hospital, years (range) |
|--------------|-------------------------|---------------------------------|-------------------------|------------------------------------------------|----------------------------------------------|--------------------------------------------------------------|
| ORNs         | 66                      | 10*                             | 46 (26–60)              | 9/1                                            | 13 (2–39)                                    | 10 (0.5–39)                                                  |
| RNAs         | 66                      | 8*                              | 50 (32–64)              | 3/5                                            | 18 (5–34)                                    | 14 (5–28)                                                    |
| Surgeons     | 37                      | 9*                              | 47 (32–65)              | 2/7                                            | 13 (0–32)                                    | 9 (2–28)                                                     |
| <b>Total</b> | <b>169</b>              | <b>27</b>                       | <b>47</b>               | <b>14/13</b>                                   | <b>15</b>                                    | <b>11</b>                                                    |

\* Same ORN was observed 1–7 times

\* Same RNA was observed 2–6 times

\* Same surgeon was observed 1–8 times

### Observed tasks and category-specific task time

During the observation the surgical team performed in average 64.4 tasks per hour. RNAs performed 72.0, surgeons 61.4 and ORNs 58.3 tasks per hour. Regarding proportion of tasks per profession, communication was most frequent for surgeons (84.0%, n=1,908), followed by ORNs (50.6%, n=1,948) and RNAs (23.4%, n=1,112) (Table 4). However, the proportion of category-specific task time per total observed time per profession has shown that direct care for surgeons equated with the surgical procedure, despite the low number of tasks dominating the surgeons' (54.1%, n=100) and ORNs' (33.5%, n=615) intra-operative time. For RNAs (41.0%, n=1,079) intra-indirect care had the largest proportion of category-specific task time. Category-specific task time for communication (ORNs 18.0%, RNAs 8.3% and surgeons 37.8%), in comparison with the high frequency of communication, is not as dominant as direct care. This reflects that communication is frequent but short, unlike direct care that is less frequent but ongoing for a longer period of time. Of the total time spent on communication (47 hours and 16 minutes), professional communication represented 38 hours and 32 minutes (81.4%),

while case-irrelevant communication comprised 8 hours and 47 minutes (18.6%). Proportions of category-specific task time, i.e. the observed time participants spent performing tasks in a particular category, are reported in Table 4 and Figure 1.

**Table 4.** Number, frequency and proportion of tasks, proportion of category-specific task time and multitasking for each profession (operating room nurses (ORNs), registered nurse anesthetists (RNAs) and surgeons), per profession-specific total observation time.\*

| Task category              | Number of tasks | Frequency of tasks (n/hour) | Proportion of tasks (%) (95% CI)* * | Proportion of category-specific task time (%) (95% CI)* * | Proportion of multi-tasking during category-specific task time (%) (95% CI)* * |
|----------------------------|-----------------|-----------------------------|-------------------------------------|-----------------------------------------------------------|--------------------------------------------------------------------------------|
| <b>Communication</b>       |                 |                             |                                     |                                                           |                                                                                |
| ORNs                       | 1,948           | 29.5                        | 50.6 (49.1–52.2)                    | 18.0 (17.0–19.1)                                          | 68.7 (65.8–71.7)                                                               |
| RNAs                       | 1,112           | 16.8                        | 23.4 (22.2–24.6)                    | 8.3 (7.7–9.0)                                             | 84.0 (80.8–86.8)                                                               |
| Surgeons                   | 1,908           | 51.6                        | 84.0 (82.4–85.5)                    | 37.8 (36.2–39.5)                                          | 89.0 (87.2–90.6)                                                               |
| <b>Total</b>               | <b>4,968</b>    |                             |                                     |                                                           |                                                                                |
| <b>Intra-indirect care</b> |                 |                             |                                     |                                                           |                                                                                |
| ORNs                       | 743             | 11.3                        | 19.3 (18.1–20.6)                    | 17.5 (16.5–18.6)                                          | 40.4 (37.6–43.9)                                                               |
| RNAs                       | 1,079           | 16.3                        | 22.7 (21.5–23.9)                    | 41.0 (39.9–42.2)                                          | 76.4 (74.8–77.9)                                                               |
| Surgeons                   | 113             | 3.1                         | 5.0 (4.2–6.0)                       | 2.5 (2.1–3.1)                                             | 23.0 (15.4–32.9)                                                               |
| <b>Total</b>               | <b>1,935</b>    |                             |                                     |                                                           |                                                                                |
| <b>Direct care</b>         |                 |                             |                                     |                                                           |                                                                                |
| ORNs                       | 615             | 9.3                         | 16.0 (14.9–17.2)                    | 33.5 (32.3–35.0)                                          | 44.9 (42.5–47.2)                                                               |
| RNAs                       | 851             | 12.9                        | 17.9 (16.8–19.0)                    | 11.2 (10.5–12.0)                                          | 74.3 (71.3–77.4)                                                               |
| Surgeons                   | 100             | 2.7                         | 4.4 (3.6–5.3)                       | 54.2 (52.4–55.8)                                          | 62.5 (60.3–64.7)                                                               |
| <b>Total</b>               | <b>1,566</b>    |                             |                                     |                                                           |                                                                                |
| <b>Medication</b>          |                 |                             |                                     |                                                           |                                                                                |
| ORNs                       | 74              | 1.1                         | 1.9 (1.5–2.4)                       | 0.6 (0.4–0.8)                                             | 43.7 (27.4–60.8)                                                               |
| RNAs                       | 942             | 14.3                        | 19.8 (18.7–21.0)                    | 7.7 (7.1–8.4)                                             | 84.8 (81.5–87.6)                                                               |
| Surgeons                   | 85              | 2.3                         | 3.7 (3.0–4.6)                       | 1.1 (0.8–1.5)                                             | 84.3 (69.6–92.6)                                                               |
| <b>Total</b>               | <b>1,101</b>    |                             |                                     |                                                           |                                                                                |
| <b>Documentation</b>       |                 |                             |                                     |                                                           |                                                                                |
| ORNs                       | 57              | 0.9                         | 1.5 (1.2–1.9)                       | 1.5 (1.2–1.8)                                             | 19.7 (12.2–29.7)                                                               |
| RNAs                       | 453             | 6.9                         | 9.5 (8.7–10.4)                      | 5.5 (5.0–6.1)                                             | 97.8 (96.0–98.9)                                                               |
| Surgeons                   | 24              | 0.7                         | 1.1 (0.7–1.6)                       | 1.3 (0.9–1.7)                                             | 20.2 (11.2–34.5)                                                               |
| <b>Total</b>               | <b>534</b>      |                             |                                     |                                                           |                                                                                |
| <b>Other</b>               |                 |                             |                                     |                                                           |                                                                                |
| ORNs                       | 240             | 3.6                         | 6.2 (5.5–7.1)                       | 8.5 (7.8–9.3)                                             | 16.4 (13.3–20.2)                                                               |
| RNAs                       | 56              | 0.9                         | 1.2 (0.9–1.5)                       | 1.1 (0.9–1.3)                                             | 26.9 (18.2–38.2)                                                               |
| Surgeons                   | 16              | 0.4                         | 0.7 (0.4–1.1)                       | 1.1 (0.8–1.5)                                             | 15.3 (7.2–31.1)                                                                |
| <b>Total</b>               | <b>312</b>      |                             |                                     |                                                           |                                                                                |
| <b>In transit</b>          |                 |                             |                                     |                                                           |                                                                                |
| ORNs                       | 89              | 1.4                         | 2.3 (1.9–2.8)                       | 4.9 (4.4–5.5)                                             | 12.8 (9.2–17.3)                                                                |
| RNAs                       | 112             | 1.7                         | 2.4 (2.0–2.8)                       | 3.6 (3.2–4.1)                                             | 49.6 (43.5–55.7)                                                               |
| Surgeons                   | 16              | 0.4                         | 0.7 (0.4–1.1)                       | 0.7 (0.5–1.1)                                             | 0.3                                                                            |
| <b>Total</b>               | <b>217</b>      |                             |                                     |                                                           |                                                                                |
| <b>Pre-indirect care</b>   |                 |                             |                                     |                                                           |                                                                                |
| ORNs                       | 59              | 0.9                         | 1.5 (1.2–2.0)                       | 2.0 (1.7–2.4)                                             | 42.3 (33.1–51.5)                                                               |
| RNAs                       | 93              | 1.4                         | 2.0 (1.6–2.4)                       | 1.5 (1.3–1.9)                                             | 41.3 (32.3–50.6)                                                               |
| Surgeons                   | -               | -                           | -                                   | -                                                         | -                                                                              |
| <b>Total</b>               | <b>152</b>      |                             |                                     |                                                           |                                                                                |
| <b>Supervision</b>         |                 |                             |                                     |                                                           |                                                                                |
| ORNs                       | 22              | 0.3                         | 0.6 (0.4–0.9)                       | 13.4 (12.5–14.4)                                          | 65.9 (62.3–69.3)                                                               |
| RNAs                       | 54              | 0.8                         | 1.1 (0.9–1.5)                       | 19.9 (19.0–21.0)                                          | 89.0 (87.3–90.6)                                                               |
| Surgeons                   | 9               | 0.2                         | 0.4 (0.2–0.7)                       | 1.4 (1.1–1.9)                                             | 99.9 (99.8–100.0)                                                              |
| <b>Total</b>               | <b>85</b>       |                             |                                     |                                                           |                                                                                |
| <b>Total</b>               | <b>10,870</b>   |                             |                                     |                                                           |                                                                                |
| <b>ORNs</b>                | <b>3,847</b>    | <b>58.3 per hour</b>        | <b>35.4%</b>                        |                                                           | <b>46.8%</b>                                                                   |
| <b>RNAs</b>                | <b>4,752</b>    | <b>72.0 per hour</b>        | <b>43.7%</b>                        |                                                           | <b>79.1%</b>                                                                   |
| <b>Surgeons</b>            | <b>2,271</b>    | <b>61.4 per hour</b>        | <b>20.9%</b>                        |                                                           | <b>70.8%</b>                                                                   |

\*Total observation time per profession was 66 hours each for the ORNs and RNAs, whereas the surgeons were observed for 37 hours

\*\*CI, confidence interval

---- Figure 1. Here ----

## Multitasking

During 169 hours of observations, 261 task hours were recorded. The discrepancy between observation time and task hours is explained by multitasking. The observed surgical team spent 48.2% (82 hours and 6 minutes, with 173 hours and 46 minutes of category-specific multitasking time) of the total observation time multitasking. The proportion that each profession spent multitasking out of their total observed time per profession was 63.1% (42 hours 2 minutes) for RNAs, 53.8% (20 hours 4 minutes) for surgeons and 30.1% (19 hours 58 minutes) for ORNs. In 74.0% of the observed tasks (n=8,106 out of the total observed tasks n=10,870) the professionals engaged in two (n=6,369) and sometimes three (n=1,650) simultaneous tasks. An example of this is observing an ongoing supervision of a student, engaging the team in the same discussion while still monitoring the patient and simultaneously disinfecting hands. Multitasking was most often observed in ORNs' and surgeons' work during communication (68.8% and 89.0% of the task time, respectively) and supervision (65.9% and 99.9%), while for RNAs, multitasking happened mostly during documentation (97.8%) and supervision (89.0%). The proportion of task time spent multitasking for the surgical team is presented in Table 4.

## Interruptions, interrupted task, causes of interruptions and task after interruption

The overall interruption rate across all tasks was 3.0 per hour (n=511). Among professions, RNAs were interrupted most frequently (n=309, 60.5%), 4.6 times per hour. The most interrupted task was documentation, with 3.8 interruptions per hour. Moreover, interruptions were common during intra-indirect care (2.8 per hour, n=181) and during direct care (2.1 per hour, n=156). Out of all observed causes of interruptions (n=426), equipment-related, i.e. concerning missing or malfunctioning equipment, were the most common at 114 (26.7%), and the second most common causes were related to the procedure, e.g. fog on lens at 95 (22.3%). The ORNs' work was typically interrupted by equipment-related (n=48, 50.5%), and procedure-related issues (n=23, 24.2%). Medication-related causes were not common (n=46, 10.7% of all causes) and affected only the RNAs' work (18.1%). After medication-related causes, the second most prevalent in RNAs' work was related to equipment (n=39, 15.3%). Procedure-related causes affected surgeons' work most often (n=35, 45.6%), in addition to equipment-related problems (n=27, 35.1%) (Table 5). The tasks following interruptions were most often communication (n=150, 39.1%), of which the majority was professional communication (n=138, 92.0%). Additionally, team responded to interruptions with intra-indirect care (n=65, 16.9%) or by providing direct care (n=53, 13.8%). ORNs responded to interruptions by communication (n=37, 39.4%, of which professional n=34, 91.8%) and with intra-indirect care (n=22, 23.4%). The RNAs' responding tasks were most often communication (n=51, 23.8%, of which professional n=44, 86.3%) or

medication-related tasks (n=48, 22.4%). Surgeons reacted mostly with communication only (n=62, 81.5%, of which professional n=60, 96.8%).

**Table 5.** Causes of observed interruptions giving overall frequency and proportion, and frequency per hour, for operating room nurses (ORNs), registered nurse anesthetists (RNAs), surgeons\* and for the surgical team as a whole.

| Causes of interruptions                 | Examples of causes of interruptions                                                          | ORNs n (%)       | RNAs n (%)        | Surgeons n (%)   | Total n (%)      |
|-----------------------------------------|----------------------------------------------------------------------------------------------|------------------|-------------------|------------------|------------------|
| <b>Equipment</b>                        | Malfunction, missing or wrong equipment<br>Change of OR table                                | 48 (50.5)        | 39 (15.3)         | 27               | 114 (26.8)       |
| <b>Related to procedure</b>             | Providing additional information<br>Contaminating sterile area<br>Fog on lens                | 23 (24.2)        | 37 (14.6)         | 35 (45.4)        | 95 (22.3)        |
| <b>Related to medication</b>            | Missing or wrong medication                                                                  | 0                | 46 (18.1)         | 0                | 46 (10.8)        |
| <b>Change of shift</b>                  | Changing staff for break or lunch during the procedure                                       | 7 (7.4)          | 33 (13.0)         | 0                | 40 (9.4)         |
| <b>Alarm</b>                            | Alarm from devices or monitors<br>Indicating high gas pressure                               | 2 (2.1)          | 31 (12.2)         | 1 (1.3)          | 34 (8.0)         |
| <b>External factor</b>                  | External person entering the room to watch the procedure or to discuss test of new equipment | 4 (4.2)          | 22 (8.7)          | 4 (5.2)          | 30 (7.0)         |
| <b>Related to patient</b>               | Changing patient position<br>Changes in patient's vital signs                                | 4 (4.2)          | 20 (7.9)          | 4 (5.2)          | 28 (6.6)         |
| <b>Telephone/pager</b>                  | Searching for surgeons<br>Planning for next procedure                                        | 6 (6.3)          | 16 (6.3)          | 5 (6.5)          | 27 (6.3)         |
| <b>Other</b>                            | Wrong action when assisting                                                                  | 1 (1.1)          | 10 (3.9)          | 1 (1.3)          | 12 (2.8)         |
| <b>Causes to observed interruptions</b> |                                                                                              | <b>95 (22.3)</b> | <b>254 (59.6)</b> | <b>77 (18.1)</b> | <b>426 (100)</b> |

\*Total observation time per profession was 66 hours each for ORNs and RNAs whereas surgeons were observed for 37 hours

## DISCUSSION

This study provides a multidimensional view of the pre- and intraoperative work process of the surgical team in the OR, including the specialized work of ORNs, RNAs and surgeons. In addition to the previous descriptions of the surgical phases and steps, we provide a broader and more detailed description of the multitude of tasks, multitasking, and interruptions and their causes. Multitasking covered a lot of the professionals' time and, in ORNs' and surgeons' work, was most often observed during communication in the team. Interruptions did not occur frequently, which differs from previous research findings from the OR. Equipment- and procedure-related interruptions were the most prevalent, while phones and pagers have been reported as such in other OR studies. Furthermore, the RNAs were those interrupted most frequently, and the most common response to interruptions was professional communication.

In the observations of the surgical teams, multitasking occurred during almost half of their working time. Multitasking seemed relevant to safe performance of patient care, which implies that it is an integral part of the surgical process. Communication was a dominant task in multitasking, which may reflect the transfer of important information between professionals, contributing to creating a smooth and efficient care process.<sup>20</sup> Much like in other studies using WOMBAT for data collection,<sup>56 58-60</sup> communication played an important role throughout the surgical procedure in our study. Even when performed simultaneously with, e.g., direct care, communication may be seen as a team-coordinating<sup>61 62</sup> and resilience-enhancing behavior. In addition, maintaining a shared situational awareness<sup>63</sup> within the team is key to anticipating possible deviations in the intra-operative process, which is a prerequisite for working in a CAS.<sup>4</sup> The amount of multitasking may be a result of the complexity of the OR context, which includes time pressure and high cognitive demands.<sup>6</sup> In rare cases, as many as three tasks occurred simultaneously, which has also been reported in another study on physicians in general wards.<sup>59</sup> However, when comparing with other settings such as EDs, the OR has several expected routine tasks and procedures, which may make multitasking less cognitively challenging in a normal situation. In our study, the professionals had relatively long work experience (mean 15 years), which may have affected the results. It has been argued that as professionals become more experienced, commonly performed deliberate tasks become more automatic, which may make multitasking easier.<sup>2</sup> Additionally, as the OR department in our study served as a teaching hospital, nursing students were present during 22 sessions, explaining the proportion of supervision in the tasks and also contributing to the amount of multitasking. Preventing multitasking might have unwanted consequences,<sup>58</sup> and impede situational awareness and adaptation to changes in a care process.<sup>61</sup>



1  
2  
3 Interactions not only predispose a team to multitasking, but may also lead to interruptions. Compared  
4 with in other studies,<sup>6 28 64</sup> the interruption rate was lower in this particular setting. Leaving aside the  
5 lengths and types of surgical procedures, this disparity may also in part be explained by the fact that  
6 most of the observed procedures were elective. The studied hospital was small and the staff turnover  
7 was fairly low, which may have had a positive effect on the number of interruptions.<sup>42</sup> Surgeons being  
8 interrupted by telephones or pagers are commonly described in literature,<sup>6 64</sup> which is not consistent  
9 with the relatively low numbers in our study, where equipment- and procedure-related issues were  
10 the most common causes of interruptions. Restrictions regarding pagers and personal telephone use  
11 have been implemented in the participating OR, which may be a reason for the lower interruption  
12 rates for surgeons. This restriction could be considered noteworthy for future development and  
13 research interventions. A control function to test the equipment prior to the start of a surgical  
14 procedure could be a way to decrease interruptions. However, implementing more barriers may result  
15 in additional, unwanted complexity, and the balance between filtering harmful consequences and the  
16 increasing the number of interactions should be addressed when designing work processes.  
17  
18  
19  
20  
21  
22  
23  
24  
25  
26  
27

28 Among professions in the surgical team, the RNAs were those who were most exposed to  
29 interruptions. Our results deviate from those of another study, in which ORNs and surgeons were  
30 interrupted more frequently than RNAs.<sup>6</sup> In this study, the observations revealed that the RNAs and  
31 the circulating nurse often communicated with professionals outside the OR and transferred  
32 information back to the surgical team. Previous research in the OR has predominantly described  
33 communication as a source of interruptions.<sup>6 11 42 43</sup> Grundgeiger<sup>30</sup> considered it a default assumption  
34 that interruptions are an inherently undesirable form of communication. However, the clinical value  
35 of information transfer, i.e., interruptive communication, has been referred to as essential for  
36 promoting patient safety,<sup>39</sup> in terms of the progression of patient care,<sup>65</sup> and important for patient  
37 treatment and workload management.<sup>38</sup> In our study, communication was the most frequently  
38 observed interrupting task, but not the actual cause of interruption, as implied by other studies<sup>42 43</sup>.  
39 Consistent with other results,<sup>66</sup> communication was the most frequent task following an interruption.  
40 Therefore, communication seems to be an important skill in adapting to the emerging situations  
41 causing interruptions.<sup>38 39</sup> This also elucidates the OR context as a CAS,<sup>4</sup> which is highly dependent on  
42 communication to support and adjust to complex interactions<sup>5</sup> within the surgical team.  
43  
44  
45  
46  
47  
48  
49  
50  
51  
52  
53  
54

55 The sometimes unpredictable nature of work in an OR, and the number and complexity of tasks,  
56 multitasking, and interruptions, requires the surgical team to interact, self-organize and solve  
57 problems through communication or by using information technology. Communication and  
58 multitasking both help and hinder task completion. The timing and coordination of activities during a  
59  
60

1  
2  
3 surgical procedure requires communication. During our observations, participants were on multiple  
4 occasions forced to alter or halt their activities and proceed with different tasks. Some of these  
5 situations may be interpreted as adaptations<sup>39</sup> while others were clear interruptions, which highlights  
6 the diverse nature of interruptions.<sup>39 67</sup> Patient- and procedure-related interruptions often arose in  
7 situations where safe and smooth intra-operative care processes needed to be safeguarded – e.g.,  
8 when patient positioning was altered for better visibility or when changed operative plans required  
9 new equipment. This illustrated resilient performance through how team adaptations counteracted  
10 the increased complexity introduced by interruptions or new medical challenges.<sup>61</sup>  
11  
12  
13  
14  
15  
16  
17

18 Our findings indicate that there is a multitude of tasks involved in everyday work in the OR. The  
19 observations also show that the impact of interruptions and multitasking can both sustain and disrupt  
20 safe care. This supports the notion that attempts should not be made to control complexity; rather it  
21 should be embraced and applied as a clarifying lens through which to understand today's healthcare  
22 organizations.<sup>5</sup> As multitasking is expected in the OR context, controlling variation and adding more  
23 barriers to the work process may instead result in even further increases to complexity. Multitasking  
24 and interrupting other team members should be accepted and done when necessary, with awareness  
25 of patient safety. The surgical team's ability to overcome and compensate for shortcomings and to  
26 adapt to variations and demands needs to be further explored. Strategies used by professionals when  
27 successfully navigating through and recovering from unexpected events and interruptions that occur  
28 in a CAS should be studied to support resilient performance.<sup>13</sup>  
29  
30  
31  
32  
33  
34  
35  
36  
37

### 38 **Strengths and limitations**

39 This study adds to the knowledge of how complex work is performed in the OR by providing a  
40 multidimensional view of the complete pre- and intraoperative work process of the surgical team. In  
41 order to produce an interprofessional view of the teamwork in the OR, the observations included three  
42 key professions: ORNs, RNAs and surgeons. However, the total observation time was somewhat lower  
43 for surgeons, as the time for observations of preparation before the surgical procedures did not include  
44 surgeons. The data collection tool used, WOMBAT, employs a structured observation protocol with an  
45 operationalized definition of "interruption", which may reduce the risk of potential measurement  
46 errors. Unlike previous WOMBAT studies reporting interrupted tasks and initiated tasks after the  
47 interruption, we include a report on the observable causes of interruptions (Why) with examples.  
48 Another strength is that both observers were experienced RNAs and one of the researchers also had  
49 experience as an ORN. However, in order to avoid bias, the observations were conducted at a hospital  
50 where the researchers had not previously worked.  
51  
52  
53  
54  
55  
56  
57  
58  
59  
60

1  
2  
3 Surgical teams in Sweden usually consist of a RNA, an anesthesiologist, an operating and assistant  
4 surgeon, an ORN and a circulating nurse. Though the assistant surgeon, anesthesiologist and the  
5 circulating nurse were observed indirectly when interacting with the observed ORN, RNA or surgeon,  
6 the nature of their performed tasks and how often they were interrupted were not recorded. This may  
7 be considered a limitation, as the whole surgical team is not represented in this study. Regulations  
8 concerning the number of people in the room and the risk of healthcare-associated infections in  
9 orthopedic implant surgery<sup>50</sup> contributed to exclusion of these procedures, which could be taken into  
10 consideration when interpreting the results. Some participants were also observed on several  
11 occasions, which may imply a potential risk for a systematic bias. This study was performed at one  
12 hospital only and did not include night shifts, weekend shifts, or procedures conducted on Fridays. This  
13 may limit the representativeness for different work shifts and may reduce the generalizability of the  
14 findings.  
15  
16  
17  
18  
19  
20  
21  
22  
23  
24  
25

## 26 **Conclusions**

27  
28 Work in the OR consists of many tasks performed by multiple professionals, with the probability of a  
29 high degree of interrelatedness. The OR may therefore be considered a CAS. In order to accomplish  
30 tasks, meet goals, and develop and deliver safe care for patients, professionals share information and  
31 coordinate their work through communication. This seems to be a factor contributing to success during  
32 surgical procedures, as it may support the safe management of complexity. Interruptions were  
33 commonly followed by professional communication, which may reflect the interactions and constant  
34 adaptations in a CAS. The impact of multitasking and interruptions on the work processes can be  
35 positive, negative or neutral. This contributes to difficulties in drawing conclusions on simple solutions.  
36 Instead of studying tasks, multitasking and interruptions separately, it may be beneficial to study these  
37 phenomena from a team perspective and as a complex process, in order to fully understand clinical  
38 work. Future patient safety research should focus on understanding the complexity within the system,  
39 the design of different work processes, and how teams meet the challenges within a CAS.  
40  
41  
42  
43  
44  
45  
46  
47  
48  
49  
50  
51  
52  
53  
54  
55  
56  
57  
58  
59  
60

### **Contributorship statement**

CG, MU, UN, AE and ME contributed to the study design. CG was the project supervisor and performed the initial exploratory observations. CG and KO were responsible for identification and definitions of categories, as well as data collection and drafting the manuscript. They also undertook the initial interpretation and statistical analysis of the data, which was followed by discussions with MU, UN, KPH, AE and ME. The CI, IRR and ICC were calculated by MKT. Drafts of the manuscript were reviewed by MU, KPH, AE, MKT, UN and ME. All authors have read and approved the final manuscript.

### **Competing interests**

The authors report no conflict of interest. The authors alone are responsible for the content and the writing of this paper.

### **Funding**

This work was funded by The Center for Clinical Research Dalarna and by Finnish state funding for university-level health research. The funders have neither been involved in any part of the study, nor in writing the manuscript or the decision to submit the manuscript for publication.

### **Data sharing statement**

No additional data are available.

### **Acknowledgements**

We want to thank Ville Pöntinen for statistical support. We also thank the heads of participating departments and the surgical teams for their willingness to participate in this study.

### **Provenance and peer review**

Not commissioned; externally peer reviewed.

## REFERENCES

1. Potter P, Wolf L, Boxerman S, et al. Understanding the cognitive work of nursing in the acute care environment. *J Nurs Adm* 2005;35(7-8):327-35. [published Online First: 2005/08/04]
2. Skaugset LM, Farrell S, Carney M, et al. Can You Multitask? Evidence and Limitations of Task Switching and Multitasking in Emergency Medicine. *Ann Emerg Med* 2016;68(2):189-95. doi: 10.1016/j.annemergmed.2015.10.003 [published Online First: 2015/11/21]
3. Nemeth C, O'Connor M, Klock PA, et al. Advances in Patient Safety Cognitive Artifacts' Implications for Health Care Information Technology: Revealing How Practitioners Create and Share Their Understanding of Daily Work. In: Henriksen K, Battles JB, Marks ES, et al., eds. *Advances in Patient Safety: From Research to Implementation (Volume 2: Concepts and Methodology)*. Rockville (MD): Agency for Healthcare Research and Quality (US) 2005.
4. Tsai MH, Sanford JA, Black IH, et al. Operating Room Management at the Edge of Order and Chaos. *J Med Pract Manage* 2017;32(4):250-55. [published Online First: 2017/01/01]
5. Braithwaite J, Churrua, K, Ellis, L, Long, J, Clay-Williams, R, Damen, N, Herkes, J, Pomare, C & Ludlow, K. *Complexity Science in Healthcare - Aspirations, Approaches, Applications and Accomplishments: A White Paper, 2017.*
6. Antoniadis S, Passauer-Baierl S, Baschnegger H, et al. Identification and interference of intraoperative distractions and interruptions in operating rooms. *J Surg Res* 2014;188(1):21-9. doi: 10.1016/j.jss.2013.12.002 [published Online First: 2014/01/11]
7. Pype P, Krystallidou D, Deveugele M, et al. Healthcare teams as complex adaptive systems: Focus on interpersonal interaction. *Patient Education and Counseling* 2017;100(11):2028-34. doi: <https://doi.org/10.1016/j.pec.2017.06.029>
8. Catchpole K, Wiegmann D. Understanding safety and performance in the cardiac operating room: from 'sharp end' to 'blunt end'. *BMJ quality & safety* 2012;21(10):807-9. doi: 10.1136/bmjqs-2012-001135 [published Online First: 2012/09/28]
9. den Boer KT, Dankelman J, Gouma DJ, et al. Peroperative analysis of the surgical procedure. *Surgical Endoscopy And Other Interventional Techniques* 2002;16(3):492-99. doi: 10.1007/s00464-001-8216-5
10. Blikkendaal MD, Driessen SR, Rodrigues SP, et al. Surgical flow disturbances in dedicated minimally invasive surgery suites: an observational study to assess its supposed superiority over conventional suites. *Surg Endosc* 2017;31(1):288-98. doi: 10.1007/s00464-016-4971-1 [published Online First: 2016/05/21]
11. Healey AN, Sevdalis N, Vincent CA. Measuring intra-operative interference from distraction and interruption observed in the operating theatre. *Ergonomics* 2006;49(5-6):589-604. doi: 10.1080/00140130600568899 [published Online First: 2006/05/24]
12. Wears RL, Hollnagel E, Braithwaite J. *Resilient health care. Volume 2, The resilience of everyday clinical work.* Farnham, Surrey: Ashgate 2015.
13. Hollnagel E, Woods, D. & Leveson, N. *Resilience engineering: concepts and precepts.* : Aldershot: Ashgate Publishing. 2006.

14. Braithwaite J, Wears RL, Hollnagel E. Resilient health care: turning patient safety on its head. *Int J Qual Health Care* 2015;27(5):418-20. doi: 10.1093/intqhc/mzv063 [published Online First: 2015/08/22]
15. Chisholm CD, Collison EK, Nelson DR, et al. Emergency department workplace interruptions: are emergency physicians "interrupt-driven" and "multitasking"? *Acad Emerg Med* 2000;7(11):1239-43. [published Online First: 2000/11/10]
16. Douglas HE, Raban MZ, Walter SR, et al. Improving our understanding of multi-tasking in healthcare: Drawing together the cognitive psychology and healthcare literature. *Applied Ergonomics* 2017;59(Part A):45-55. doi: <https://doi.org/10.1016/j.apergo.2016.08.021>
17. Laxmisan A, Hakimzada F, Sayan OR, et al. The multitasking clinician: Decision-making and cognitive demand during and after team handoffs in emergency care. *International Journal of Medical Informatics* 2007;76(11-12):801-11. doi: <http://dx.doi.org/10.1016/j.ijmedinf.2006.09.019>
18. Weigl M, Müller A, Zupanc A, et al. Participant observation of time allocation, direct patient contact and simultaneous activities in hospital physicians. *BMC Health Services Research* 2009;9(1):110. doi: 10.1186/1472-6963-9-110
19. Colligan L, Bass EJ. Interruption handling strategies during paediatric medication administration. *BMJ quality & safety* 2012;21(11):912-7. doi: 10.1136/bmjqs-2011-000292 [published Online First: 2012/07/14]
20. Berg LM, Ehrenberg A, Florin J, et al. An observational study of activities and multitasking performed by clinicians in two Swedish emergency departments. *Eur J Emerg Med* 2012;19(4):246-51. doi: 10.1097/MEJ.0b013e32834c314a [published Online First: 2011/09/22]
21. Forsberg HH, Muntlin Athlin A, von Thiele Schwarz U. Nurses' perceptions of multitasking in the emergency department: effective, fun and unproblematic (at least for me) - a qualitative study. *Int Emerg Nurs* 2015;23(2):59-64. doi: 10.1016/j.ienj.2014.05.002 [published Online First: 2014/06/24]
22. Weigl M, Muller A, Sevdalis N, et al. Relationships of multitasking, physicians' strain, and performance: an observational study in ward physicians. *J Patient Saf* 2013;9(1):18-23. doi: 10.1097/PTS.0b013e31826b7b87 [published Online First: 2012/09/26]
23. Westbrook JI, Raban MZ, Walter SR, et al. Task errors by emergency physicians are associated with interruptions, multitasking, fatigue and working memory capacity: a prospective, direct observation study. *BMJ Quality & Safety* 2018;27(8):655-63. doi: 10.1136/bmjqs-2017-007333
24. Kalisch BJ, Aebersold M. Interruptions and Multitasking in Nursing Care. *The Joint Commission Journal on Quality and Patient Safety* 2010;36(3):126-32. doi: [https://doi.org/10.1016/S1553-7250\(10\)36021-1](https://doi.org/10.1016/S1553-7250(10)36021-1)
25. Murji A, Luketic L, Sobel ML, et al. Evaluating the effect of distractions in the operating room on clinical decision-making and patient safety. *Surg Endosc* 2016;30(10):4499-504. doi: 10.1007/s00464-016-4782-4 [published Online First: 2016/02/21]
26. Li L, Hains I, Hordern T, et al. What do ICU doctors do? A multisite time and motion study of the clinical work patterns of registrars. *Crit Care Resusc* 2015;17(3):159-66. [published Online First: 2015/08/19]
27. Walter SR, Li L, Dunsmuir WT, et al. Managing competing demands through task-switching and multitasking: a multi-setting observational study of 200 clinicians

- over 1000 hours. *BMJ quality & safety* 2014;23(3):231-41. doi: 10.1136/bmjqs-2013-002097 [published Online First: 2013/10/19]
28. Bellandi T, Cerri A, Carreras G, et al. Interruptions and multitasking in surgery: a multicentre observational study of the daily work patterns of doctors and nurses. *Ergonomics* 2017;1-8. doi: 10.1080/00140139.2017.1349934 [published Online First: 2017/07/13]
29. Werner NE, Holden RJ. Interruptions in the wild: Development of a sociotechnical systems model of interruptions in the emergency department through a systematic review. *Appl Ergon* 2015;51:244-54. doi: 10.1016/j.apergo.2015.05.010 [published Online First: 2015/07/15]
30. Grundgeiger T, Dekker S, Sanderson P, et al. Obstacles to research on the effects of interruptions in healthcare. *BMJ quality & safety* 2016;25(6):392-5. doi: 10.1136/bmjqs-2015-004083 [published Online First: 2015/12/15]
31. Sasangohar F, Donmez B, Trbovich P, et al. Not All Interruptions are Created Equal: Positive Interruptions in Healthcare. *Proceedings of the Human Factors and Ergonomics Society Annual Meeting* 2012;56(1):824-28. doi: 10.1177/1071181312561172
32. Boehm-Davis DA, Remington R. Reducing the disruptive effects of interruption: a cognitive framework for analysing the costs and benefits of intervention strategies. *Accid Anal Prev* 2009;41(5):1124-9. doi: 10.1016/j.aap.2009.06.029 [published Online First: 2009/08/12]
33. Campbell G, Arfanis K, Smith AF. Distraction and interruption in anaesthetic practice. *Br J Anaesth* 2012;109(5):707-15. doi: 10.1093/bja/aes219 [published Online First: 2012/07/04]
34. Westbrook JI, Coiera E, Dunsmuir WT, et al. The impact of interruptions on clinical task completion. *Qual Saf Health Care* 2010;19(4):284-9. doi: 10.1136/qshc.2009.039255 [published Online First: 2010/05/14]
35. Potter P, Boxerman S, Wolf L, et al. Mapping the nursing process: a new approach for understanding the work of nursing. *J Nurs Adm* 2004;34(2):101-9. [published Online First: 2004/02/11]
36. Cook RI, Render M, Woods DD. Gaps in the continuity of care and progress on patient safety. *BMJ : British Medical Journal* 2000;320(7237):791-94.
37. Raban MZ, Westbrook JI. Are interventions to reduce interruptions and errors during medication administration effective?: a systematic review. *BMJ quality & safety* 2014;23(5):414-21. doi: 10.1136/bmjqs-2013-002118 [published Online First: 2013/08/28]
38. Walter SR, Raban MZ, Dunsmuir WTM, et al. Emergency doctors' strategies to manage competing workload demands in an interruptive environment: An observational workflow time study. *Appl Ergon* 2017;58:454-60. doi: 10.1016/j.apergo.2016.07.020 [published Online First: 2016/09/17]
39. Berg LM, Kallberg AS, Ehrenberg A, et al. Factors influencing clinicians' perceptions of interruptions as disturbing or non-disturbing: A qualitative study. *Int Emerg Nurs* 2016;27:11-6. doi: 10.1016/j.ienj.2016.01.003 [published Online First: 2016/03/08]
40. Alvarez G, Coiera E. Interruptive communication patterns in the intensive care unit ward round. *Int J Med Inform* 2005;74(10):791-6. doi: 10.1016/j.ijmedinf.2005.03.017 [published Online First: 2005/07/19]

- 1  
2  
3 41. Woloshynowych M, Davis R, Brown R, et al. Communication patterns in a UK  
4 emergency department. *Ann Emerg Med* 2007;50(4):407-13. doi:  
5 10.1016/j.annemergmed.2007.08.001 [published Online First: 2007/09/21]  
6  
7 42. Gillespie BM, Chaboyer W, Fairweather N. Interruptions and miscommunications in  
8 surgery: an observational study. *Aorn j* 2012;95(5):576-90. doi:  
9 10.1016/j.aorn.2012.02.012 [published Online First: 2012/05/01]  
10  
11 43. Persoon MC, Broos HJHP, Witjes JA, et al. The effect of distractions in the operating  
12 room during endourological procedures. *Surgical Endoscopy* 2011;25(2):437-43.  
13 doi: 10.1007/s00464-010-1186-8  
14  
15 44. Yoong W, Khin A, Ramlal N, et al. Interruptions and distractions in the gynaecological  
16 operating theatre: irritating or dangerous? *Ergonomics* 2015;58(8):1314-9. doi:  
17 10.1080/00140139.2015.1005171 [published Online First: 2015/02/13]  
18  
19 45. Zheng B, Martinec DV, Cassera MA, et al. A quantitative study of disruption in the  
20 operating room during laparoscopic antireflux surgery. *Surg Endosc*  
21 2008;22(10):2171-7. doi: 10.1007/s00464-008-0017-7 [published Online First:  
22 2008/07/16]  
23  
24 46. Cohen TN, Cabrera JS, Sisk OD, et al. Identifying workflow disruptions in the  
25 cardiovascular operating room. *Anaesthesia* 2016;71(8):948-54. doi:  
26 10.1111/anae.13521 [published Online First: 2016/07/12]  
27  
28 47. Healey AN, Primus CP, Koutantji M. Quantifying distraction and interruption in  
29 urological surgery. *Qual Saf Health Care* 2007;16(2):135-9. doi:  
30 10.1136/qshc.2006.019711 [published Online First: 2007/04/04]  
31  
32 48. Tiferes J, Hussein AA, Bisantz A, et al. The Loud Surgeon Behind the Console:  
33 Understanding Team Activities During Robot-Assisted Surgery. *J Surg Educ*  
34 2016;73(3):504-12. doi: 10.1016/j.jsurg.2015.12.009 [published Online First:  
35 2016/04/14]  
36  
37 49. Nilsson U, Jaensson M. Anesthetic Nursing: Keep in Touch, Watch Over, and Be One  
38 Step Ahead. *J Perianesth Nurs* 2016;31(6):550-51. doi:  
39 10.1016/j.jopan.2016.09.005 [published Online First: 2016/12/10]  
40  
41 50. Andersson AE, Bergh I, Karlsson J, et al. Traffic flow in the operating room: an  
42 explorative and descriptive study on air quality during orthopedic trauma  
43 implant surgery. *Am J Infect Control* 2012;40(8):750-5. doi:  
44 10.1016/j.ajic.2011.09.015 [published Online First: 2012/01/31]  
45  
46 51. Westbrook JI, Ampt A. Design, application and testing of the Work Observation  
47 Method by Activity Timing (WOMBAT) to measure clinicians' patterns of work  
48 and communication. *Int J Med Inform* 2009;78 Suppl 1:S25-33. doi:  
49 10.1016/j.ijmedinf.2008.09.003 [published Online First: 2008/10/28]  
50  
51 52. Palmer G, 2nd, Abernathy JH, 3rd, Swinton G, et al. Realizing improved patient care  
52 through human-centered operating room design: a human factors methodology  
53 for observing flow disruptions in the cardiothoracic operating room.  
54 *Anesthesiology* 2013;119(5):1066-77. doi: 10.1097/ALN.0b013e31829f68cf  
55 [published Online First: 2013/07/03]  
56  
57 53. CHSSR. Work Observation Method By Activity Timing. A guide to the installation and  
58 use of WOMBAT V2.0. . Kensington, NSW: The University of New South Wales  
59 Australian Institute of Health Innovation, Faculty of Medicine, 2012.  
60  
61 54. Landis JR, Koch GG. The measurement of observer agreement for categorical data.  
62 *Biometrics* 1977;33(1):159-74. [published Online First: 1977/03/01]



- 1  
2  
3 55. McDonald S. Studying actions in context: a qualitative shadowing method for  
4 organizational research. *Qualitative Research* 2005;5(4):455-73. doi:  
5 10.1177/1468794105056923  
6  
7 56. Lehnbohm EC, Li L, Prgomet M, et al. Little Things Matter: A Time and Motion Study of  
8 Pharmacists' Activities in a Paediatric Hospital. *Stud Health Technol Inform*  
9 2016;227:80-6. [published Online First: 2016/07/22]  
10  
11 57. Brown LD, Cai TT, DasGupta A. Interval Estimation for a Binomial Proportion.  
12 *Statistical Science* 2001;16(2):101-17.  
13  
14 58. Larcos G, Prgomet M, Georgiou A, et al. A work observation study of nuclear medicine  
15 technologists: interruptions, resilience and implications for patient safety. *BMJ*  
16 *quality & safety* 2016 doi: 10.1136/bmjqs-2016-005846 [published Online First:  
17 2016/10/22]  
18  
19 59. Richardson LC, Lehnbohm EC, Baysari MT, et al. A time and motion study of junior  
20 doctor work patterns on the weekend: a potential contributor to the weekend  
21 effect? *Intern Med J* 2016;46(7):819-25. doi: 10.1111/imj.13120 [published  
22 Online First: 2016/04/21]  
23  
24 60. Westbrook JI, Duffield C, Li L, et al. How much time do nurses have for patients? A  
25 longitudinal study quantifying hospital nurses' patterns of task time distribution  
26 and interactions with health professionals. *BMC Health Serv Res* 2011;11:319. doi:  
27 10.1186/1472-6963-11-319 [published Online First: 2011/11/25]  
28  
29 61. Bogdanovic J, Perry J, Guggenheim M, et al. Adaptive coordination in surgical teams:  
30 an interview study. *BMC Health Services Research* 2015;15:128. doi:  
31 10.1186/s12913-015-0792-5  
32  
33 62. Gillespie BM, Gwinner K, Chaboyer W, et al. Team communications in surgery -  
34 creating a culture of safety. *J Interprof Care* 2013;27(5):387-93. doi:  
35 10.3109/13561820.2013.784243  
36  
37 63. Gillespie BM, Gwinner K, Fairweather N, et al. Building shared situational awareness  
38 in surgery through distributed dialog. *Journal of multidisciplinary healthcare*  
39 2013;6:109-18. doi: 10.2147/jmdh.s40710 [published Online First: 2013/05/11]  
40  
41 64. Weigl M, Antoniadis S, Chiapponi C, et al. The impact of intra-operative interruptions  
42 on surgeons' perceived workload: an observational study in elective general and  
43 orthopedic surgery. *Surg Endosc* 2015;29(1):145-53. doi: 10.1007/s00464-014-  
44 3668-6 [published Online First: 2014/07/06]  
45  
46 65. Sasangohar F, Donmez B, Easty A, et al. Interruptions experienced by cardiovascular  
47 intensive care unit nurses: an observational study. *J Crit Care* 2014;29(5):848-53.  
48 doi: 10.1016/j.jcrc.2014.05.007 [published Online First: 2014/06/30]  
49  
50 66. Ballermann MA, Shaw NT, Mayes DC, et al. Validation of the Work Observation  
51 Method By Activity Timing (WOMBAT) method of conducting time-motion  
52 observations in critical care settings: an observational study. *BMC Medical*  
53 *Informatics and Decision Making* 2011;11:32-32. doi: 10.1186/1472-6947-11-32  
54  
55 67. Westbrook JI. Interruptions and multi-tasking: moving the research agenda in new  
56 directions. *BMJ quality & safety* 2014;23(11):877-9. doi: 10.1136/bmjqs-  
57 201003372 [published Online First: 2014/07/20]

## Figure Legends

**Figure 1.** Distribution of the proportion of the observed time\* participants spent performing tasks in a particular category

\*Total observation time per profession was 66 hours each for ORNs and RNAs, whereas surgeons were observed for 37 hours

1  
2  
3  
4  
5  
6  
7  
8  
9  
10  
11  
12  
13  
14  
15  
16  
17  
18  
19  
20  
21  
22  
23  
24  
25  
26  
27  
28  
29  
30  
31  
32  
33  
34  
35  
36  
37  
38  
39  
40  
41  
42  
43  
44  
45  
46  
47  
48  
49  
50  
51  
52  
53  
54  
55  
56  
57  
58  
59  
60

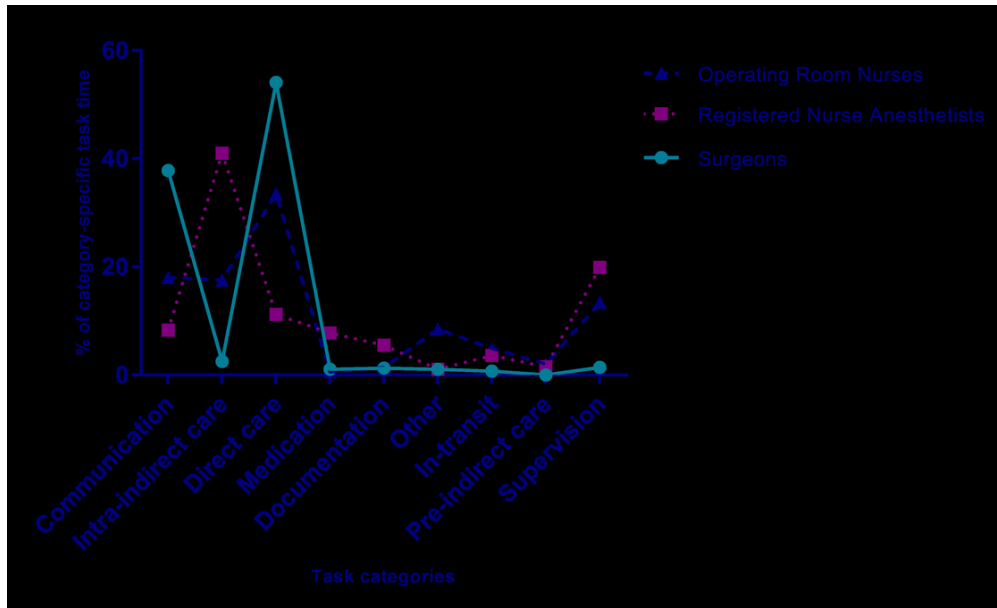

Figure 1. Distribution of the proportion of the observed time\* participants spent performing tasks in a particular category  
 \*Total observation time per profession was 66 hours each for ORNs and RNAs, whereas surgeons were observed for 37 hours

94x57mm (300 x 300 DPI)

**STROBE 2007 (v4) Statement—Checklist of items that should be included in reports of *cross-sectional studies*.**

| Section/Topic                | Item # | Recommendation                                                                                                                                                                       | Reported on page #                         |
|------------------------------|--------|--------------------------------------------------------------------------------------------------------------------------------------------------------------------------------------|--------------------------------------------|
| <b>Title and abstract</b>    | 1      | (a) Indicate the study's design with a commonly used term in the title or the abstract                                                                                               | #1                                         |
|                              |        | (b) Provide in the abstract an informative and balanced summary of what was done and what was found                                                                                  | #2                                         |
| <b>Introduction</b>          |        |                                                                                                                                                                                      |                                            |
| Background/rationale         | 2      | Explain the scientific background and rationale for the investigation being reported                                                                                                 | #4 - #6                                    |
| Objectives                   | 3      | State specific objectives, including any prespecified hypotheses                                                                                                                     | #5 - #6                                    |
| <b>Methods</b>               |        |                                                                                                                                                                                      |                                            |
| Study design                 | 4      | Present key elements of study design early in the paper                                                                                                                              | #6                                         |
| Setting                      | 5      | Describe the setting, locations, and relevant dates, including periods of recruitment, exposure, follow-up, and data collection                                                      | #6 - #9                                    |
| Participants                 | 6      | (a) Give the eligibility criteria, and the sources and methods of selection of participants                                                                                          | #9                                         |
| Variables                    | 7      | Clearly define all outcomes, exposures, predictors, potential confounders, and effect modifiers. Give diagnostic criteria, if applicable                                             | #5-#6, not fully applicable for this study |
| Data sources/<br>measurement | 8*     | For each variable of interest, give sources of data and details of methods of assessment (measurement). Describe comparability of assessment methods if there is more than one group | #6-#7, not fully applicable for this study |
| Bias                         | 9      | Describe any efforts to address potential sources of bias                                                                                                                            | #17                                        |
| Study size                   | 10     | Explain how the study size was arrived at                                                                                                                                            | #6                                         |
| Quantitative variables       | 11     | Explain how quantitative variables were handled in the analyses. If applicable, describe which groupings were chosen and why                                                         | #10                                        |
| Statistical methods          | 12     | (a) Describe all statistical methods, including those used to control for confounding                                                                                                | #10                                        |
|                              |        | (b) Describe any methods used to examine subgroups and interactions                                                                                                                  | Not applicable for this study              |

|                   |     |                                                                                                                                                                                                              |                                                                    |
|-------------------|-----|--------------------------------------------------------------------------------------------------------------------------------------------------------------------------------------------------------------|--------------------------------------------------------------------|
|                   |     | (c) Explain how missing data were addressed                                                                                                                                                                  | Missing data were treated as missing, and not imputed or averaged. |
|                   |     | (d) If applicable, describe analytical methods taking account of sampling strategy                                                                                                                           | Not applicable for this study                                      |
|                   |     | (e) Describe any sensitivity analyses                                                                                                                                                                        | Not applicable for this study                                      |
| <b>Results</b>    |     |                                                                                                                                                                                                              |                                                                    |
| Participants      | 13* | (a) Report numbers of individuals at each stage of study—eg numbers potentially eligible, examined for eligibility, confirmed eligible, included in the study, completing follow-up, and analysed            | #11                                                                |
|                   |     | (b) Give reasons for non-participation at each stage                                                                                                                                                         | #9                                                                 |
|                   |     | (c) Consider use of a flow diagram                                                                                                                                                                           | Not applicable for this study                                      |
| Descriptive data  | 14* | (a) Give characteristics of study participants (eg demographic, clinical, social) and information on exposures and potential confounders                                                                     | #11                                                                |
|                   |     | (b) Indicate number of participants with missing data for each variable of interest                                                                                                                          | Not applicable for this study                                      |
| Outcome data      | 15* | Report numbers of outcome events or summary measures                                                                                                                                                         | #11-#14                                                            |
| Main results      | 16  | (a) Give unadjusted estimates and, if applicable, confounder-adjusted estimates and their precision (eg, 95% confidence interval). Make clear which confounders were adjusted for and why they were included | #10                                                                |
|                   |     | (b) Report category boundaries when continuous variables were categorized                                                                                                                                    | Not applicable for this study                                      |
|                   |     | (c) If relevant, consider translating estimates of relative risk into absolute risk for a meaningful time period                                                                                             | Not applicable for this study                                      |
| Other analyses    | 17  | Report other analyses done—eg analyses of subgroups and interactions, and sensitivity analyses                                                                                                               | Not applicable for this study                                      |
| <b>Discussion</b> |     |                                                                                                                                                                                                              |                                                                    |
| Key results       | 18  | Summarise key results with reference to study objectives                                                                                                                                                     | #15                                                                |
| Limitations       | 19  | Discuss limitations of the study, taking into account sources of potential bias or imprecision. Discuss both direction and magnitude of any potential bias                                                   | #17-#18                                                            |

|                  |                          |    |                                                                                                                                                                            |         |
|------------------|--------------------------|----|----------------------------------------------------------------------------------------------------------------------------------------------------------------------------|---------|
| 1<br>2<br>3<br>4 | Interpretation           | 20 | Give a cautious overall interpretation of results considering objectives, limitations, multiplicity of analyses, results from similar studies, and other relevant evidence | #17-#18 |
| 5<br>6           | Generalisability         | 21 | Discuss the generalisability (external validity) of the study results                                                                                                      | #18     |
| 7                | <b>Other information</b> |    |                                                                                                                                                                            |         |
| 8<br>9           | Funding                  | 22 | Give the source of funding and the role of the funders for the present study and, if applicable, for the original study on which the present article is based              | #19     |

10  
11 \*Give information separately for cases and controls in case-control studies and, if applicable, for exposed and unexposed groups in cohort and cross-sectional studies.

12  
13  
14 **Note:** An Explanation and Elaboration article discusses each checklist item and gives methodological background and published examples of transparent reporting. The STROBE  
15 checklist is best used in conjunction with this article (freely available on the Web sites of PLoS Medicine at <http://www.plosmedicine.org/>, Annals of Internal Medicine at  
16 <http://www.annals.org/>, and Epidemiology at <http://www.epidem.com/>). Information on the STROBE Initiative is available at [www.strobe-statement.org](http://www.strobe-statement.org).  
17  
18  
19  
20  
21  
22  
23  
24  
25  
26  
27  
28  
29  
30  
31  
32  
33  
34  
35  
36  
37  
38  
39  
40  
41  
42  
43  
44  
45  
46

# BMJ Open

## Tasks, multitasking and interruptions among the surgical team in an operating room: a prospective observational study

|                                 |                                                                                                                                                                                                                                                                                                                                                                                                                                                                                                                                                                                                                                                                                                                                                                                                                                                                                                                                                                                                                                                                                                                                                               |
|---------------------------------|---------------------------------------------------------------------------------------------------------------------------------------------------------------------------------------------------------------------------------------------------------------------------------------------------------------------------------------------------------------------------------------------------------------------------------------------------------------------------------------------------------------------------------------------------------------------------------------------------------------------------------------------------------------------------------------------------------------------------------------------------------------------------------------------------------------------------------------------------------------------------------------------------------------------------------------------------------------------------------------------------------------------------------------------------------------------------------------------------------------------------------------------------------------|
| Journal:                        | <i>BMJ Open</i>                                                                                                                                                                                                                                                                                                                                                                                                                                                                                                                                                                                                                                                                                                                                                                                                                                                                                                                                                                                                                                                                                                                                               |
| Manuscript ID                   | bmjopen-2018-026410.R2                                                                                                                                                                                                                                                                                                                                                                                                                                                                                                                                                                                                                                                                                                                                                                                                                                                                                                                                                                                                                                                                                                                                        |
| Article Type:                   | Research                                                                                                                                                                                                                                                                                                                                                                                                                                                                                                                                                                                                                                                                                                                                                                                                                                                                                                                                                                                                                                                                                                                                                      |
| Date Submitted by the Author:   | 28-Feb-2019                                                                                                                                                                                                                                                                                                                                                                                                                                                                                                                                                                                                                                                                                                                                                                                                                                                                                                                                                                                                                                                                                                                                                   |
| Complete List of Authors:       | Göras, Camilla; Örebro University, Faculty of Medicine and Health, School of Health Sciences<br>Olin, Karolina; Karolinska Institutet, Medical Management Centre, Dept of Learning, Informatics, Management and Ethics (LIME); Turku University Hospital , Administration Centre<br>Unbeck, Maria; Karolinska Institutet Department of Molecular Medicine and Surgery<br>Pukk Harenstam, Karin; Karolinska Universitetssjukhuset, Astrid Lindgren's Children's Hospital; Karolinska Institutet, Medical Management Centre, Dept. of Learning, Informatics, Management and Ethics (LIME)<br>Ehrenberg, Anna ; Dalarna University, Centre for Clinical Research<br>Tessma, Mesfin; Karolinska Institutet, Medical Management Centre, Dept of Learning, Informatics, Management and Ethics (LIME)<br>Nilsson, Ulrica; Karolinska Institutet, Department of Neurobiology, Care Sciences and Society, Karolinska Institutet Perioperative Medicine and Intensive Care<br>Ekstedt, Mirjam; Karolinska Institutet, Medical Management Centre, Dept of Learning, Informatics, Management and Ethics (LIME);<br>Linneuniversitet, School of Health and Caring Sciences |
| <b>Primary Subject Heading</b>: | Surgery                                                                                                                                                                                                                                                                                                                                                                                                                                                                                                                                                                                                                                                                                                                                                                                                                                                                                                                                                                                                                                                                                                                                                       |
| Secondary Subject Heading:      | Anaesthesia                                                                                                                                                                                                                                                                                                                                                                                                                                                                                                                                                                                                                                                                                                                                                                                                                                                                                                                                                                                                                                                                                                                                                   |
| Keywords:                       | Complexity, Multitasking, Interruptions, Patient Safety, Operating room                                                                                                                                                                                                                                                                                                                                                                                                                                                                                                                                                                                                                                                                                                                                                                                                                                                                                                                                                                                                                                                                                       |
|                                 |                                                                                                                                                                                                                                                                                                                                                                                                                                                                                                                                                                                                                                                                                                                                                                                                                                                                                                                                                                                                                                                                                                                                                               |

SCHOLARONE™  
Manuscripts

## Tasks, multitasking and interruptions among the surgical team in an operating room: a prospective observational study

Corresponding author: Karolina Olin [karolina.olin@ki.se](mailto:karolina.olin@ki.se) ; Medical Management Centre, LIME, Tomtebodavägen 18 A, 17177 Stockholm, Sweden, +358(0)400850513

Camilla Göras\*, RNA, MSc, PhD student<sup>1,2,3</sup>, Karolina Olin\*, RNA, MSc, PhD student<sup>4,5</sup>, Maria Unbeck, RN, PhD<sup>6,7</sup>, Karin Pukk-Härenstam MD PHD<sup>4,8</sup>, Anna Ehrenberg, RN, Professor<sup>9</sup>, Mesfin Kassaye Tessma, MD, MPH<sup>4</sup>, Ulrica Nilsson, RNA, Professor<sup>10</sup> Mirjam Ekstedt, RN, Professor<sup>4,11</sup>

<sup>1</sup> School of Health Sciences, Faculty of Medicine and Health, Örebro University, Örebro, Sweden

<sup>2</sup> Department of Anaesthesia and Intensive Care Unit, Falu Hospital, Falun, Sweden

<sup>3</sup> Centre for Clinical Research, Falun, Dalarna, Sweden

<sup>4</sup> Department of Learning, Informatics, Management and Ethics, Karolinska Institutet, Stockholm, Sweden

<sup>5</sup> Development Centre, Turku University Hospital, Turku, Finland

<sup>6</sup> Trauma and Reparative Medicine Theme, Karolinska University Hospital, Stockholm, Sweden

<sup>7</sup> Department of Molecular Medicine and Surgery, Karolinska Institutet, Stockholm, Sweden

<sup>8</sup> Paediatric Emergency Department, Karolinska University Hospital, Stockholm, Sweden

<sup>9</sup> School of Education, Health and Social Studies, Dalarna University, Falun, Sweden

<sup>10</sup> Department of Neurobiology, Care Sciences and Society, Karolinska Institutet Perioperative Medicine and Intensive Care, Karolinska University Hospital, Stockholm, Sweden

<sup>11</sup> Department of Health and Caring Sciences, Linnaeus University, Kalmar/Växjö Sweden.

\*Both authors contributed equally to this work

### Email addresses and phone numbers:

CG: [camilla.goras@outlook.com](mailto:camilla.goras@outlook.com), +46(0) 23492101

KO: [karolina.olin@ki.se](mailto:karolina.olin@ki.se), +358(0) 400850513

MU: [maria.unbeck@sll.se](mailto:maria.unbeck@sll.se), +46(0) 851770000

KPH: [karin.pukk-harenstam@sll.se](mailto:karin.pukk-harenstam@sll.se), +46(0) 708558896

AE: [aeh@du.se](mailto:aeh@du.se), +46(0) 23778472

MKT: [mesfin.tessma@ki.se](mailto:mesfin.tessma@ki.se). + 46(0) 8524 837 94

UN: [ulrica.nilsson@ki.se](mailto:ulrica.nilsson@ki.se), +46(0) 8524 838 22

ME: [mirjam.ekstedt@ki.se](mailto:mirjam.ekstedt@ki.se), +46(0)703185691

*Words:* 4684 words (excluding: title page, abstract, references, tables and figures)

## ABSTRACT

**Objectives** The work context of the operating room (OR) is considered complex and dynamic with high cognitive demands. A multidimensional view of the complete pre- and intraoperative work process of the surgical team in the OR has been sparsely described. The aim of this study was to describe the type and frequency of tasks, multitasking, interruptions and their causes during surgical procedures from a multi-dimensional perspective on the surgical team in the OR.

**Design** Prospective observational study, using the Work Observation Method By Activity Timing (WOMBAT) tool.

**Setting** An OR department at a county hospital in Sweden.

**Participants** Operating room nurses (ORNs) (n=10), registered nurse anesthetists (RNAs) (n=8) and surgeons (n=9).

**Results** The type, frequency and time spent on specific tasks, multitasking and interruptions were measured. From a multidimensional view, the surgical team performed 64 tasks per hour. Communication represented almost half (45.7%) of all observed tasks. Concerning task time, direct care dominated the surgeons' and ORNs' intra-operative time while in RNAs' work it was intra-indirect care. In total 48.2% of time was spent in multitasking and was most often observed in ORNs' and surgeons' work during communication. Interruptions occurred 3.0 per hour, and the largest proportion, 26.7%, was related to equipment. Interruptions were most commonly followed by professional communication.

**Conclusions** The surgical team constantly dealt with multitasking and interruptions, both with potential impact on workflow and patient safety. Interruptions were commonly followed by professional communication, which may reflect the interactions and constant adaptations in a complex adaptive system. Future research should focus on understanding the complexity within the system, on the design of different work processes, and on how teams meet the challenges of a complex adaptive systems.

Words: 279

**Keywords:** Complexity, multitasking, interruptions, patient safety, operating room

**Ethical registration number**

2016/264



## STRENGTHS AND LIMITATIONS OF THIS STUDY

- This study adds to the knowledge of how complex work is performed in the operating room by providing a multidimensional view of the complete pre- and intraoperative work process of the surgical team.
- The data collection tool used, WOMBAT, employs a structured observation protocol with an operationalized definition of “interruption”, which may reduce the risk of potential measurement errors.
- Even though the assistant surgeon, anesthesiologist and the circulating nurse were observed indirectly when interacting with the observed operating room nurse, registered nurse anesthetist or surgeon, the nature of performed tasks and how often they were interrupted was not recorded, which may be considered a limitation, as the whole surgical team is not represented in this study.
- Some participants were also observed on several occasions, which may imply a potential risk for a systematic bias.
- This study was performed at one hospital only and the observations did not include night shifts, weekend shifts or procedures conducted on Fridays, which may limit the representativeness for different work shifts and may reduce the generalizability of the findings.

## BACKGROUND

Clinical work in surgery is often fast-paced, demanding and time- and resource-constrained. It requires specific technical and cognitive skills<sup>1</sup> and involves multiple activities such as organizing care, responding to patients' changing conditions, anticipating needs, and performing surgical procedures.<sup>1</sup>

<sup>2</sup> An operating room (OR) can be considered a complex adaptive system (CAS),<sup>3,4</sup> which requires that professionals act and communicate, adapt, learn and self-organize over time.<sup>5</sup> It is an interconnected and dynamic environment<sup>3</sup> with an inherent potential for distractions and interruptions.<sup>1,6</sup>

The members of the surgical team are essential actors in the OR,<sup>7</sup> focused on providing safe surgical care. In addition, components such as a suitable environment, functioning equipment, drugs, and disposable items are needed to support the intra-operative process.<sup>8</sup> The work process of the surgical team in the OR is mainly described through the surgical procedure and its phases,<sup>9</sup> sometimes including the phases of anesthesia.<sup>10</sup> The OR context has considerable potential for interruptions that may interfere with the work of the surgical team.<sup>6,11</sup> Good outcomes often rely on individuals' and teams' skills in adjusting and adapting to unexpected events and rapidly changing situations, using communication and interaction, i.e., resilient performance.<sup>12,13</sup> Understanding resilience requires a deep understanding of the work as it is actually carried out, rather than how it is usually presented in standardized models.<sup>14</sup>

Multitasking can be defined as managing multiple tasks simultaneously.<sup>15,16</sup> However, inconsistencies in definitions and methods make it difficult to make comparisons between studies.<sup>16</sup> Multitasking is one strategy used to cope with increased work density<sup>17,18</sup> and prioritize between tasks.<sup>19</sup> It is often expressed as an integral part of daily practices and a skill often used by professionals, especially in the emergency department (ED).<sup>17</sup> To ensure immediate communication and information seeking, multitasking can be appropriate.<sup>20</sup> Professionals working in emergency care settings usually do not perceive multitasking as stressful, but see it as related to safe and efficient task completion.<sup>21</sup>

Previous research has showed that physicians are frequently required to multitask, which may affect their work process and potentially impact on patient safety.<sup>22</sup> A recent study showed associations between multitasking and increased rates of prescription errors among physicians in the ED.<sup>23</sup> It has also been reported that even though nurses manage multitasking and interruptions well, errors still occur.<sup>24</sup> In addition, professionals in the OR are expected to multitask by being available through pagers and telephones during the surgical procedures.<sup>25</sup> Research on multitasking has mostly been conducted in EDs, hospital wards and intensive care units (ICUs), primarily involving nurses and

1  
2  
3 physicians, and the results show that multitasking occurs frequently.<sup>18 22 26 27</sup> However, multitasking in  
4 the OR has been studied only rarely.<sup>28</sup> Although multitasking is common, knowledge about the impact  
5 on patient safety and outcomes is sparse.<sup>16</sup>  
6  
7  
8  
9

10 Interruption is a complex phenomenon, and can be described as a process of suspension of a current  
11 (primary) task to attend to and work on another (secondary) task. Interruptions can involve multiple  
12 interconnected components, such as equipment, organizational factors, task characteristics and  
13 external environmental conditions.<sup>29</sup> Interruptions may contribute to task incompleteness,<sup>15 30-32</sup> loss of  
14 attention, medication errors<sup>33</sup> and gaps in continuity of care.<sup>34</sup> Associations have been found between  
15 interruptions and medication prescription errors in the ED.<sup>23</sup> However, interventions to reduce  
16 interruptions have shown limited effectiveness.<sup>35</sup> The frequency, duration,<sup>36 37</sup> sources or causes of  
17 interruptions and effects on professionals<sup>11</sup> and work processes have been studied in the OR.<sup>6 10 38</sup>  
18 Previous work has mostly focused on interruptions from a negative perspective, where minimizing or  
19 preventing interruptions has been the main concern.<sup>39</sup> Recent research claims that interruptions may  
20 also have a positive impact on patient safety when they entail, for example, obtaining advice from a  
21 colleague, or receiving timely<sup>40</sup> and relevant information about a patient.<sup>41</sup> Several studies have  
22 described communication as a source of interruptions.<sup>42 43</sup> Additionally, in the OR, communication has  
23 been described in terms of being irrelevant or miscommunication.<sup>6 10 11 44 45</sup> Since communication is a  
24 relevant task that supports interactions in a CAS,<sup>5</sup> it should be seen both as a means of supporting  
25 clinical work and as a source of interruptions. These findings reveal that interruptions are not well  
26 understood in the OR.  
27  
28  
29  
30  
31  
32  
33  
34  
35  
36  
37  
38  
39

40 To conclude, previous research has studied the work process of the surgical team mainly during surgery  
41 and anesthesia. The OR is a CAS, where interruptions with diverse nature frequently occur and  
42 multitasking is expected, which may affect workflow and patient safety. However, multitasking with a  
43 team perspective has not been studied in the OR. Thus, there is a lack of knowledge regarding the  
44 multi-dimensional view of the pre- and intraoperative work process in the OR focusing on all  
45 performed tasks, multitasking, interruptions and their causes, i.e., how the work is actually done in the  
46 surgical team. Therefore, the aim of this study was to describe the type and frequency of tasks,  
47 multitasking, interruptions and their causes from a multi-dimensional perspective for the surgical team  
48 in the OR.  
49  
50  
51  
52  
53  
54  
55  
56  
57  
58  
59  
60

## METHODS

### Setting and sample

This prospective observational study was conducted in a central OR department at a local county hospital in Sweden. The hospital had two surgical wards, with a total of 38 beds. For general surgery, there was one department for ambulatory surgery and one central OR department. During 2016, a total of 4,118 patients underwent surgery at this hospital. The central OR department consisted of six rooms that served both acute and elective orthopedic and surgical patients. In connection to each OR, there was a preparation room where the registered nurse anesthetist (RNA) and/or the anesthesiologist sometimes prepared patients for surgery. Some medications were also stored in this area.

As in many other countries, surgical teams in ORs in Sweden commonly comprise six professionals, namely: RNA,<sup>46</sup> anesthesiologist, operating surgeon and assisting surgeon, operating room nurse (ORN) and a circulating nurse (commonly a licensed practical nurse).<sup>6</sup> For the observations we selected a convenience sample of scheduled general surgical procedures from a case list. To provide coverage and representativeness of common procedures performed at the department across weekdays (Mon–Thu) and shifts (07:30–21:00 hours) the sample included acute and elective general surgical procedures performed on adults. Since the number of people present in the OR is associated with risk for healthcare-associated infections during orthopaedic procedures,<sup>47</sup> such procedures were excluded, as were night shifts. The professionals were informed about the study during workplace meetings and invited to participate.

### Patient and public involvement

Patients or the public were not involved in this study.

### Tool and definitions

The Work Observation Method By Activity Timing (WOMBAT) software with a portable touchscreen tablet (Lenovo 7 Tab3) was used to collect data. The tool includes different dimensions of work, as well as specific categories of task and subcategories within these dimensions,<sup>48</sup> which were customized by the researchers to fit the context of this study. Information recorded for each observed task included the dimensions: task type (What?), with whom (Who?) the participant interacted (e.g. other members of the surgical team), resources (How?) used (e.g. telephone), multitasking and the observable cause (Why?) of any interruptions that occurred. Tasks performed by the participants were recorded by

selecting the predefined categories. A clear statement of definitions being used is considered crucial.<sup>49</sup>  
The concepts used in this study, with associated operationalized definitions, are presented in Table 1.

Table 1. Used concepts and their operational definitions

| Concepts                  | Operational definitions                                                                                                                                                                                     |
|---------------------------|-------------------------------------------------------------------------------------------------------------------------------------------------------------------------------------------------------------|
| Multitasking              | When a member of the surgical team carried out observable multiple tasks simultaneously e.g. talking to a colleague while preparing medication                                                              |
| Primary task              | The ongoing task which is being interrupted                                                                                                                                                                 |
| Interruption              | When a member of the surgical team suspended a current task because of an observable external stimulus e.g. paused to prepare an infusion when a surgeon asks to change the position of the operating table |
| Cause of interruptions    | Describes the cause to an observable interruption                                                                                                                                                           |
| Secondary task            | Task that interrupts an ongoing task or tasks                                                                                                                                                               |
| Task after secondary task | Tasks initiated after secondary task                                                                                                                                                                        |

### Adaptation of the WOMBAT tool to the OR context

In order to ensure validity, ORNs', RNAs' and surgeons' work tasks were first mapped and then discussed with one expert from each targeted profession. The researchers – who later carried out the observations – discussed representation of dimensions, categories, subcategories, multitasking, causes of interruptions in WOMBAT, until consensus was reached over mutually exclusive definitions (Table 2). Common causes of interruptions in the OR have been presented in previous taxonomies and frameworks,<sup>6 38 50</sup> and based on the existing literature and pilot observations, categories were developed for observations of interruptions using WOMBAT. The observable cause has in other studies been named as 'alert for the secondary task'<sup>51</sup> or 'external prompt'<sup>40</sup>. These categories were later confirmed by field notes on examples of the observable cause to an interruption. To verify the correct programming of WOMBAT, written dummy cases were developed and tested. Prior to actual data collection, researchers conducted approximately 15 hours each of pilot testing of WOMBAT based on observations of the three professions, during 12 surgical procedures. The categories, subcategories and their task classifications were then once more refined and adapted to the WOMBAT tool. For example, indirect care was divided in two phases (pre and intra) in order to better identify the preparatory phase before patient's arrival at the OR. To further clarify the cause of an interruption, broad categories were programmed under an additional dimension: "Why?".

**Table 2.** Task classifications for the surgical team

| Task categories and subcategories               | Definitions                                                           | Included activities                                                                                                                                 |
|-------------------------------------------------|-----------------------------------------------------------------------|-----------------------------------------------------------------------------------------------------------------------------------------------------|
| <b>Pre-indirect care</b>                        | Tasks indirectly related to patient care prior to patient arrival     |                                                                                                                                                     |
| Disinfect                                       |                                                                       | Pre-operative hand washing/disinfection                                                                                                             |
| Organize/arrange                                |                                                                       | Preparing equipment                                                                                                                                 |
| Control/Count                                   |                                                                       | Checking equipment, counting instruments, swabs                                                                                                     |
| Read                                            |                                                                       | Reading/searching patient information                                                                                                               |
| Clean                                           |                                                                       | Arranging and cleaning                                                                                                                              |
| Protect                                         |                                                                       | Applying sterile gown, gloves, apron                                                                                                                |
| <b>Intra-indirect care</b>                      | Tasks indirectly related to patient care, when the patient is present |                                                                                                                                                     |
| Observe/monitor                                 |                                                                       | Monitoring patients' vital parameters                                                                                                               |
| Disinfect                                       |                                                                       | Hand washing/disinfection                                                                                                                           |
| Organize/arrange                                |                                                                       | Preparing equipment                                                                                                                                 |
| Control/count                                   |                                                                       | Controlling equipment, counting instruments, swabs                                                                                                  |
| Read                                            |                                                                       | Reading and reviewing patient information                                                                                                           |
| Clean                                           |                                                                       | Arranging and cleaning                                                                                                                              |
| Protect                                         |                                                                       | Applying protective apron or gloves                                                                                                                 |
| <b>Direct care</b>                              | Tasks directly related to patient care                                |                                                                                                                                                     |
| Skin disinfection                               |                                                                       | Disinfecting the incision area, including drying time                                                                                               |
| Drape                                           |                                                                       | Draping the patient                                                                                                                                 |
| Assist                                          |                                                                       | Assisting another professional                                                                                                                      |
| Instrumentation                                 |                                                                       | Instrumentation with surgeon                                                                                                                        |
| Perform invasive surgical/anesthetic procedures |                                                                       | Performing the procedure/intubation, inserting intravenous lines                                                                                    |
| Perform patient care                            |                                                                       | Communicating with the patient, mobilizing of the patient, dressing the wound, moving the patient to the bed                                        |
| <b>Medication</b>                               | Tasks related to providing medication to a patient                    |                                                                                                                                                     |
| Prepare                                         |                                                                       | Reading prescriptions, preparing syringes                                                                                                           |
| Administer                                      |                                                                       | Giving medication to the patient                                                                                                                    |
| Document                                        |                                                                       | Documenting medication care                                                                                                                         |
| Communicate                                     |                                                                       | Discussing medication care and prescriptions, asking for clarification                                                                              |
| <b>Documentation</b>                            | Any recording of patient information on paper or computer             |                                                                                                                                                     |
| <b>Communication</b>                            | Any work-related or social discussion with another staff member       |                                                                                                                                                     |
| Professional                                    |                                                                       | Discussions related to the procedure, planning the care of the patient, paging surgeon or anesthesiologist, reporting, completing the WHO checklist |
| Irrelevant                                      |                                                                       | Case-irrelevant communication                                                                                                                       |
| <b>Supervision</b>                              | Any activity focused on teaching or education                         | <i>(Note: When supervision is taking place, all other tasks are "multitasking".)</i>                                                                |
| <b>Other</b>                                    | Any other task not included above                                     | For example: waiting for a colleague or a decision, when there is no communication                                                                  |
| <b>In transit</b>                               | Any movement between rooms                                            | Transferring the patient into and out of the room<br>Getting equipment needed                                                                       |

### Inter-rater reliability

Inter-rater reliability (IRR) was tested during pilot observations, with the researchers independently observing the same participant for 30 minutes.<sup>52</sup> Situations that were difficult to record using the pre-defined task definitions were discussed between sessions to achieve agreement in subsequent observations. During the last three pilot observations, adequate Cohen's kappa value ( $\geq 0.81$ )<sup>52</sup> on most observed tasks were achieved (0.85 for indirect care (pre and intra), 0.87 for direct care, 0.93 for medication and 0.82 for communication).<sup>53</sup> This required alignment of both observers' independent observations side by side and comparison of tasks by task classification, duration and temporal order. During the pilot observations only few interruptions occurred, so calculating kappa was not feasible. However, the observers had identified the interruptions, interrupting task and their causes similarly. Additionally, IRR was assessed using the intra-class correlation (ICC). The proportions of tasks between observers, as well as proportions of time within task categories were examined.<sup>23</sup> Two-way mixed model was used to measure ICC and it was 0.96 (95% CI, 0.83 to 0.99) indicating a high IRR.

### Data collection

Observations were performed between 07:30 and 21:00 on Monday to Thursday from 14 November to 15 December 2016. Prior to the observation sessions, professionals involved in selected surgical procedures provided informed consent and were informed that they might withdraw from the study at any time. Consent was not obtained from patients and other professionals, as they were not targeted in the observations. However, they were informed orally about the study and were given the option to deny observations of the procedure they were participating in. If this occurred prior to or during a surgical procedure the observation should stop and already collected data would be excluded from the study. However, this did not occur. Observations of ORNs and RNAs started when the participants began to plan and prepare for the surgical procedure and continued until the patient had left the OR. The RNAs were also observed in the preparation room, which was adjacent to the OR. Observation of the surgeon started when they entered the OR and ended when they left the OR after the surgical procedure. Thus, the surgeons were observed for a total of 37 hours whereas ORNs and RNAs were observed for 66 hours each. The researcher followed the same participant unobtrusively during the whole surgical procedure, registering tasks the participant performed, with whom and how.<sup>54</sup> When an interruption occurred, manifest causes (what could be observed) of the interruption were registered in WOMBAT. The underlying cause, often verbally expressed, was written down in the field notes, as were examples of what the observable cause could be. To complete the structured

1  
2  
3 observations with contextual factors such as testing of new medical-technical equipment, field notes  
4 were made during and directly after the observations.  
5  
6  
7

## 8 **Ethics**

10  
11 This study was conducted in accordance with international research standards under the Declaration  
12 of Helsinki and was approved by the Regional Ethical Review Board in Uppsala, Sweden (No.  
13 2016/264).  
14  
15  
16

## 18 **Data analysis**

20  
21 Descriptive statistics were used to determine the total observation time, number and proportion of  
22 tasks, proportion of category-specific task time and multitasking time based on total observed time  
23 per profession and interruption rate per hour of the surgical team. Calculation of proportion of task,  
24 summation of time on task, proportion of time on task, and confidence interval (CI) were calculated  
25 based on the WOMBAT analysis guide<sup>55</sup>, with slight modifications for the latter. In the literature some  
26 have reported a large sample approximation for calculating the CI.<sup>56</sup> Considering the problem of  
27 interval estimation of proportion and the erratic behavior of the large sample approximation (the Wald  
28 interval) we have employed the Wilson's confidence interval. The CI from the Wald interval often has  
29 inadequate coverage, particularly for small sample size and values of proportions close to 0 or 1, while  
30 the Wilson interval is appropriate for both smaller and larger sample sizes and provides more reliable  
31 coverage than other alternatives. The Wilson interval uses the estimated standard error instead of the  
32 "null standard error".<sup>57</sup> Since our data include both small and large sample sizes and lower and higher  
33 proportions, we felt that the Wilson's interval as a viable alternative for interval estimate of the  
34 proportions. Analysis of the data was performed using Microsoft Excel 2016 and the Statistical Package  
35 for Social Sciences, SPSS version21.  
36  
37  
38  
39  
40  
41  
42  
43  
44  
45  
46  
47  
48  
49  
50  
51  
52  
53  
54  
55  
56  
57  
58  
59  
60



## RESULTS

During the data collection period, 199 procedures in general surgery were performed at the OR department and 46 (23.1%) of these were observed. The 46 surgical procedures included in the data collection contained 78 unique recorded observation sessions, including 26 observations per profession. ORNs and RNAs were observed for 66 hours each and surgeons were observed for 37 hours, with a total time of 169 observation hours. Of the 46 surgical procedures, four were acute and the rest were elective. According to type of surgery, 28 of these procedures were laparoscopic and 18 were conducted with open surgery. The surgical procedures, from incision until wound closure, lasted between 38 minutes and 3 hours and 15 minutes (mean time 42 minutes). General anesthesia was administered in 42 of the 46 (91.3%) surgical procedures and regional anesthesia in four (8.7%). Demographic data for the participants is presented in Table 3.

**Table 3.** Demographic data for operating room nurses (ORNs), registered nurse anesthetists (RNAs), and surgeons during the observed surgical procedures (n=26), by profession

| Profession   | Observation time, hours | Number of observed participants | Mean age, years (range) | Gender of the participant, female/male, number | Mean experience as specialist, years (range) | Mean experience at the participating hospital, years (range) |
|--------------|-------------------------|---------------------------------|-------------------------|------------------------------------------------|----------------------------------------------|--------------------------------------------------------------|
| ORNs         | 66                      | 10*                             | 46 (26–60)              | 9/1                                            | 13 (2–39)                                    | 10 (0.5–39)                                                  |
| RNAs         | 66                      | 8*                              | 50 (32–64)              | 3/5                                            | 18 (5–34)                                    | 14 (5–28)                                                    |
| Surgeons     | 37                      | 9*                              | 47 (32–65)              | 2/7                                            | 13 (0–32)                                    | 9 (2–28)                                                     |
| <b>Total</b> | <b>169</b>              | <b>27</b>                       | <b>47</b>               | <b>14/13</b>                                   | <b>15</b>                                    | <b>11</b>                                                    |

\* Same ORN was observed 1–7 times

\* Same RNA was observed 2–6 times

\* Same surgeon was observed 1–8 times

### Observed tasks and category-specific task time

During the observation the surgical team performed in average 64.4 tasks per hour. RNAs performed 72.0, surgeons 61.4 and ORNs 58.3 tasks per hour. Regarding proportion of tasks per profession, communication is most frequent for surgeons (84.0%, n=1,908), followed by ORNs (50.6%, n=1,948) and RNAs (23.4%, n=1,112) (Table 4). However, the proportion of category-specific task time per total observed time per profession has shown that direct care for surgeons equated with the surgical procedure, despite the low number of tasks dominating the surgeons' (54.1%, n=100) and ORNs' (33.5%, n=615) intra-operative time. For RNAs (41.0%, n=1,079) intra-indirect care had the largest proportion of category-specific task time. Category-specific task time for communication (ORNs 18.0%, RNAs 8.3% and surgeons 37.8%), in comparison with the high frequency of communication, is not as dominant as direct care. This reflects that communication is frequent but short, unlike direct care that is less frequent but ongoing for a longer period of time. Of the total time spent on communication (47 hours and 16 minutes), professional communication represented 38 hours and 32 minutes (81.4%),

while case-irrelevant communication comprised 8 hours and 47 minutes (18.6%). Proportions of category-specific task time, i.e. the observed time participants spent performing tasks in a particular category, are reported in Table 4 and Figure 1.

**Table 4.** Number, frequency and proportion of tasks, proportion of category-specific task time and multitasking for each profession (operating room nurses (ORNs), registered nurse anesthetists (RNAs) and surgeons), per profession-specific total observation time.\*

| Task category              | Number of tasks | Frequency of tasks (n/hour) | Proportion of tasks (%) (95% CI)* * | Proportion of category-specific task time (%) (95% CI)* * | Proportion of multi-tasking during category-specific task time (%) (95% CI)* * |
|----------------------------|-----------------|-----------------------------|-------------------------------------|-----------------------------------------------------------|--------------------------------------------------------------------------------|
| <b>Communication</b>       |                 |                             |                                     |                                                           |                                                                                |
| ORNs                       | 1,948           | 29.5                        | 50.6 (49.1–52.2)                    | 18.0 (17.0–19.1)                                          | 68.7 (65.8–71.7)                                                               |
| RNAs                       | 1,112           | 16.8                        | 23.4 (22.2–24.6)                    | 8.3 (7.7–9.0)                                             | 84.0 (80.8–86.8)                                                               |
| Surgeons                   | 1,908           | 51.6                        | 84.0 (82.4–85.5)                    | 37.8 (36.2–39.5)                                          | 89.0 (87.2–90.6)                                                               |
| <b>Total</b>               | <b>4,968</b>    |                             |                                     |                                                           |                                                                                |
| <b>Intra-indirect care</b> |                 |                             |                                     |                                                           |                                                                                |
| ORNs                       | 743             | 11.3                        | 19.3 (18.1–20.6)                    | 17.5 (16.5–18.6)                                          | 40.4 (37.6–43.9)                                                               |
| RNAs                       | 1,079           | 16.3                        | 22.7 (21.5–23.9)                    | 41.0 (39.9–42.2)                                          | 76.4 (74.8–77.9)                                                               |
| Surgeons                   | 113             | 3.1                         | 5.0 (4.2–6.0)                       | 2.5 (2.1–3.1)                                             | 23.0 (15.4–32.9)                                                               |
| <b>Total</b>               | <b>1,935</b>    |                             |                                     |                                                           |                                                                                |
| <b>Direct care</b>         |                 |                             |                                     |                                                           |                                                                                |
| ORNs                       | 615             | 9.3                         | 16.0 (14.9–17.2)                    | 33.5 (32.3–35.0)                                          | 44.9 (42.5–47.2)                                                               |
| RNAs                       | 851             | 12.9                        | 17.9 (16.8–19.0)                    | 11.2 (10.5–12.0)                                          | 74.3 (71.3–77.4)                                                               |
| Surgeons                   | 100             | 2.7                         | 4.4 (3.6–5.3)                       | 54.2 (52.4–55.8)                                          | 62.5 (60.3–64.7)                                                               |
| <b>Total</b>               | <b>1,566</b>    |                             |                                     |                                                           |                                                                                |
| <b>Medication</b>          |                 |                             |                                     |                                                           |                                                                                |
| ORNs                       | 74              | 1.1                         | 1.9 (1.5–2.4)                       | 0.6 (0.4–0.8)                                             | 43.7 (27.4–60.8)                                                               |
| RNAs                       | 942             | 14.3                        | 19.8 (18.7–21.0)                    | 7.7 (7.1–8.4)                                             | 84.8 (81.5–87.6)                                                               |
| Surgeons                   | 85              | 2.3                         | 3.7 (3.0–4.6)                       | 1.1 (0.8–1.5)                                             | 84.3 (69.6–92.6)                                                               |
| <b>Total</b>               | <b>1,101</b>    |                             |                                     |                                                           |                                                                                |
| <b>Documentation</b>       |                 |                             |                                     |                                                           |                                                                                |
| ORNs                       | 57              | 0.9                         | 1.5 (1.2–1.9)                       | 1.5 (1.2–1.8)                                             | 19.7 (12.2–29.7)                                                               |
| RNAs                       | 453             | 6.9                         | 9.5 (8.7–10.4)                      | 5.5 (5.0–6.1)                                             | 97.8 (96.0–98.9)                                                               |
| Surgeons                   | 24              | 0.7                         | 1.1 (0.7–1.6)                       | 1.3 (0.9–1.7)                                             | 20.2 (11.2–34.5)                                                               |
| <b>Total</b>               | <b>534</b>      |                             |                                     |                                                           |                                                                                |
| <b>Other</b>               |                 |                             |                                     |                                                           |                                                                                |
| ORNs                       | 240             | 3.6                         | 6.2 (5.5–7.1)                       | 8.5 (7.8–9.3)                                             | 16.4 (13.3–20.2)                                                               |
| RNAs                       | 56              | 0.9                         | 1.2 (0.9–1.5)                       | 1.1 (0.9–1.3)                                             | 26.9 (18.2–38.2)                                                               |
| Surgeons                   | 16              | 0.4                         | 0.7 (0.4–1.1)                       | 1.1 (0.8–1.5)                                             | 15.3 (7.2–31.1)                                                                |
| <b>Total</b>               | <b>312</b>      |                             |                                     |                                                           |                                                                                |
| <b>In transit</b>          |                 |                             |                                     |                                                           |                                                                                |
| ORNs                       | 89              | 1.4                         | 2.3 (1.9–2.8)                       | 4.9 (4.4–5.5)                                             | 12.8 (9.2–17.3)                                                                |
| RNAs                       | 112             | 1.7                         | 2.4 (2.0–2.8)                       | 3.6 (3.2–4.1)                                             | 49.6 (43.5–55.7)                                                               |
| Surgeons                   | 16              | 0.4                         | 0.7 (0.4–1.1)                       | 0.7 (0.5–1.1)                                             | 0.3                                                                            |
| <b>Total</b>               | <b>217</b>      |                             |                                     |                                                           |                                                                                |
| <b>Pre-indirect care</b>   |                 |                             |                                     |                                                           |                                                                                |
| ORNs                       | 59              | 0.9                         | 1.5 (1.2–2.0)                       | 2.0 (1.7–2.4)                                             | 42.3 (33.1–51.5)                                                               |
| RNAs                       | 93              | 1.4                         | 2.0 (1.6–2.4)                       | 1.5 (1.3–1.9)                                             | 41.3 (32.3–50.6)                                                               |
| Surgeons                   | -               | -                           | -                                   | -                                                         | -                                                                              |
| <b>Total</b>               | <b>152</b>      |                             |                                     |                                                           |                                                                                |
| <b>Supervision</b>         |                 |                             |                                     |                                                           |                                                                                |
| ORNs                       | 22              | 0.3                         | 0.6 (0.4–0.9)                       | 13.4 (12.5–14.4)                                          | 65.9 (62.3–69.3)                                                               |
| RNAs                       | 54              | 0.8                         | 1.1 (0.9–1.5)                       | 19.9 (19.0–21.0)                                          | 89.0 (87.3–90.6)                                                               |
| Surgeons                   | 9               | 0.2                         | 0.4 (0.2–0.7)                       | 1.4 (1.1–1.9)                                             | 99.9 (99.8–100.0)                                                              |
| <b>Total</b>               | <b>85</b>       |                             |                                     |                                                           |                                                                                |
| <b>Total</b>               | <b>10,870</b>   |                             |                                     |                                                           |                                                                                |
| <b>ORNs</b>                | <b>3,847</b>    | <b>58.3 per hour</b>        | <b>35.4%</b>                        |                                                           | <b>46.8%</b>                                                                   |
| <b>RNAs</b>                | <b>4,752</b>    | <b>72.0 per hour</b>        | <b>43.7%</b>                        |                                                           | <b>79.1%</b>                                                                   |
| <b>Surgeons</b>            | <b>2,271</b>    | <b>61.4 per hour</b>        | <b>20.9%</b>                        |                                                           | <b>70.8%</b>                                                                   |

\* Total observation time per profession was 66 hours each for the ORNs and RNAs, whereas the surgeons were observed for 37 hours

\*\*CI, confidence interval

---- Figure 1. Here ----

## Multitasking

During 169 hours of observations, 261 task hours were recorded. The discrepancy between observation time and task hours is explained by multitasking. The observed surgical team spent 48.2% (82 hours and 6 minutes, with 173 hours and 46 minutes of category-specific multitasking time) of the total observation time multitasking. The proportion that each profession spent multitasking out of their total observed time per profession was 63.1% (42 hours 2 minutes) for RNAs, 53.8% (20 hours 4 minutes) for surgeons and 30.1% (19 hours 58 minutes) for ORNs. In 74.0% of the observed tasks (n=8,106 out of the total observed tasks n=10,870) the professionals engaged in two (n=6,369) and sometimes three (n=1,650) simultaneous tasks. An example of this is observing an ongoing supervision of a student, engaging the team in the same discussion while still monitoring the patient and simultaneously disinfecting hands. Multitasking was most often observed in ORNs' and surgeons' work during communication (68.8% and 89.0% of the task time, respectively) and supervision (65.9% and 99.9%), while for RNAs, multitasking happened mostly during documentation (97.8%) and supervision (89.0%). The proportion of task time spent multitasking for the surgical team is presented in Table 4.

## Interruptions, interrupted primary tasks, causes of interruptions and task after secondary task.

The overall interruption rate across all tasks was 3.0 per hour (n=511). Among professions, RNAs were interrupted most frequently (n=309, 60.5%), 4.6 times per hour. The most interrupted primary task was documentation, with 3.8 interruptions per hour. Moreover, interruptions were common during intra- indirect care (2.8 per hour, n=181) and during direct care (2.1 per hour, n=156). Out of all observed causes of interruptions (n=426), equipment-related, i.e. concerning missing or malfunctioning equipment, were the most common at 114 (26.7%), and the second most common causes were related to the procedure, e.g. fog on lens at 95 (22.3%). The ORNs' work was typically interrupted by equipment-related (n=48, 50.5%), and procedure-related issues (n=23, 24.2%). Medication-related causes were not common (n=46, 10.7% of all causes) and affected only the RNAs' work (18.1%). After medication-related causes, the second most prevalent in RNAs' work was related to equipment (n=39, 15.3%). Procedure-related causes affected surgeons' work most often (n=35, 45.6%), in addition to equipment-related problems (n=27, 35.1%) (Table 5). The tasks following secondary tasks were most often communication (n=150, 39.1%), of which the majority was professional communication (n=138, 92.0%). Additionally, team responded to interruptions with intra- indirect care (n=65, 16.9%) or by providing direct care (n=53, 13.8%). ORNs responded to interruptions by communication (n=37, 39.4%, of which professional n=34, 91.8%) and with intra-indirect care (n=22, 23.4%). The RNAs' responding tasks were most often communication (n=51, 23.8%, of which

professional n=44, 86.3%) or medication-related tasks (n=48, 22.4%). Surgeons reacted mostly with communication only (n=62, 81.5%, of which professional n=60, 96.8%).

**Table 5.** Causes of observed interruptions giving overall frequency and proportion, and frequency per hour, for operating room nurses (ORNs), registered nurse anesthetists (RNAs), surgeons\* and for the surgical team as a whole.

| Causes of interruptions                 | Examples of causes of interruptions                                                          | ORNs n (%)       | RNAs n (%)        | Surgeons n (%)   | Total n (%)      |
|-----------------------------------------|----------------------------------------------------------------------------------------------|------------------|-------------------|------------------|------------------|
| <b>Equipment</b>                        | Malfunction, missing or wrong equipment<br>Change of OR table                                | 48 (50.5)        | 39 (15.3)         | 27 (35.1)        | 114 (26.8)       |
| <b>Related to procedure</b>             | Providing additional information<br>Contaminating sterile area<br>Fog on lens                | 23 (24.2)        | 37 (14.6)         | 35 (45.4)        | 95 (22.3)        |
| <b>Related to medication</b>            | Missing or wrong medication                                                                  | 0                | 46 (18.1)         | 0                | 46 (10.8)        |
| <b>Change of shift</b>                  | Changing staff for break or lunch during the procedure                                       | 7 (7.4)          | 33 (13.0)         | 0                | 40 (9.4)         |
| <b>Alarm</b>                            | Alarm from devices or monitors<br>Indicating high gas pressure                               | 2 (2.1)          | 31 (12.2)         | 1 (1.3)          | 34 (8.0)         |
| <b>External factor</b>                  | External person entering the room to watch the procedure or to discuss test of new equipment | 4 (4.2)          | 22 (8.7)          | 4 (5.2)          | 30 (7.0)         |
| <b>Related to patient</b>               | Changing patient position<br>Changes in patient's vital signs                                | 4 (4.2)          | 20 (7.9)          | 4 (5.2)          | 28 (6.6)         |
| <b>Telephone/pager</b>                  | Searching for surgeons<br>Planning for next procedure                                        | 6 (6.3)          | 16 (6.3)          | 5 (6.5)          | 27 (6.3)         |
| <b>Other</b>                            | Wrong action when assisting                                                                  | 1 (1.1)          | 10 (3.9)          | 1 (1.3)          | 12 (2.8)         |
| <b>Causes to observed interruptions</b> |                                                                                              | <b>95 (22.3)</b> | <b>254 (59.6)</b> | <b>77 (18.1)</b> | <b>426 (100)</b> |

\*Total observation time per profession was 66 hours each for ORNs and RNAs whereas surgeons were observed for 37 hours

## DISCUSSION

This study provides a multidimensional view of the pre- and intraoperative work process of the surgical team in the OR, including the specialized work of ORNs, RNAs and surgeons. In addition to the previous descriptions of the surgical phases and steps, we provide a broader and more detailed description of the multitude of tasks, multitasking, and interruptions and their causes. Multitasking covered a lot of the professionals' time and, in ORNs' and surgeons' work, was most often observed during communication in the team. Interruptions did not occur frequently, which differs from previous research findings from the OR. Equipment- and procedure-related interruptions were the most prevalent, while phones and pagers have been reported as such in other OR studies. Furthermore, the RNAs were those interrupted most frequently, and the most common response to interruptions was professional communication.

In the observations of the surgical teams, multitasking occurred during almost half of their working time. Multitasking seemed relevant to safe performance of patient care, which implies that it is an integral part of the surgical process. Communication was a dominant task in multitasking, which may reflect the transfer of important information between professionals, contributing to creating a smooth and efficient care process.<sup>20</sup> Much like in other studies using WOMBAT for data collection,<sup>56 58-60</sup> communication played an important role throughout the surgical procedure in our study. Even when performed simultaneously with, e.g., direct care, communication may be seen as a team-coordinating<sup>61 62</sup> and resilience-enhancing behavior. In addition, maintaining a shared situational awareness<sup>63</sup> within the team is key to anticipating possible deviations in the intra-operative process, which is a prerequisite for working in a CAS.<sup>4</sup> The amount of multitasking may be a result of the complexity of the OR context, which includes time pressure and high cognitive demands.<sup>6</sup> In rare cases, as many as three tasks occurred simultaneously, which has also been reported in another study on physicians in general wards.<sup>59</sup> However, when comparing with other settings such as EDs, the OR has several expected routine tasks and procedures, which may make multitasking less cognitively challenging in a normal situation. In our study, the professionals had relatively long work experience (mean 15 years), which may have affected the results. It has been argued that as professionals become more experienced, commonly performed deliberate tasks become more automatic, which may make multitasking easier.<sup>2</sup> Additionally, as the OR department in our study served as a teaching hospital, nursing students were present during 22 sessions, explaining the proportion of supervision in the tasks and also contributing to the amount of multitasking. Preventing multitasking might have unwanted consequences,<sup>58</sup> and impede situational awareness and adaptation to changes in a care process.<sup>61</sup>

1  
2  
3 Interactions not only predispose a team to multitasking, but may also lead to interruptions. Compared  
4 with in other studies,<sup>6 28 64</sup> the interruption rate was lower in this particular setting. Leaving aside the  
5 lengths and types of surgical procedures, this disparity may also in part be explained by the fact that  
6 most of the observed procedures were elective. The studied hospital was small and the staff turnover  
7 was fairly low, which may have had a positive effect on the number of interruptions.<sup>44</sup> Surgeons being  
8 interrupted by telephones or pagers are commonly described in literature,<sup>6 64</sup> which is not consistent  
9 with the relatively low numbers in our study, where equipment- and procedure-related issues were  
10 the most common causes of interruptions. Restrictions regarding pagers and personal telephone use  
11 have been implemented in the participating OR, which may be a reason for the lower interruption  
12 rates for surgeons. This restriction could be considered noteworthy for future development and  
13 research interventions. A control function to test the equipment prior to the start of a surgical  
14 procedure could be a way to decrease interruptions. However, implementing more barriers may result  
15 in additional, unwanted complexity, and the balance between filtering harmful consequences and the  
16 increasing the number of interactions should be addressed when designing work processes.  
17  
18  
19  
20  
21  
22  
23  
24  
25  
26  
27

28 Among professions in the surgical team, the RNAs were those who were most exposed to  
29 interruptions. Our results deviate from those of another study, in which ORNs and surgeons were  
30 interrupted more frequently than RNAs.<sup>6</sup> In this study, the observations revealed that the RNAs and  
31 the circulating nurse often communicated with professionals outside the OR and transferred  
32 information back to the surgical team. Previous research in the OR has predominantly described  
33 communication as a source of interruptions.<sup>6 11 44 45</sup> Grundgeiger<sup>49</sup> considered it a default assumption  
34 that interruptions are an inherently undesirable form of communication. However, the clinical value  
35 of information transfer, i.e., interruptive communication, has been referred to as essential for  
36 promoting patient safety,<sup>41</sup> in terms of the progression of patient care,<sup>65</sup> and important for patient  
37 treatment and workload management.<sup>40</sup> In our study, communication was the most frequently  
38 observed secondary, interrupting task, but not the actual cause of interruption, as implied by other  
39 studies<sup>44 45</sup>. Consistent with other results,<sup>66</sup> communication was the most frequent task following a  
40 secondary task, after an interruption. Therefore, communication seems to be an important skill in  
41 adapting to the emerging situations causing interruptions.<sup>40 41</sup> This also elucidates the OR context as a  
42 CAS,<sup>4</sup> which is highly dependent on communication to support and adjust to complex interactions<sup>5</sup>  
43 within the surgical team.  
44  
45  
46  
47  
48  
49  
50  
51  
52  
53  
54  
55

56 The sometimes unpredictable nature of work in an OR, and the number and complexity of tasks,  
57 multitasking, and interruptions, requires the surgical team to interact, self-organize and solve  
58 problems through communication or by using information technology. Communication and  
59  
60

1  
2  
3 multitasking both help and hinder task completion. The timing and coordination of activities during a  
4 surgical procedure requires communication. During our observations, participants were on multiple  
5 occasions forced to alter or halt their activities and proceed with different tasks. Some of these  
6 situations may be interpreted as adaptations<sup>41</sup> while others were clear interruptions, which highlights  
7 the diverse nature of interruptions.<sup>41 67</sup> Patient- and procedure-related interruptions often arose in  
8 situations where safe and smooth intra-operative care processes needed to be safeguarded – e.g.,  
9 when patient positioning was altered for better visibility or when changed operative plans required  
10 new equipment. This illustrated resilient performance through how team adaptations counteracted  
11 the increased complexity introduced by interruptions or new medical challenges.<sup>61</sup>  
12  
13  
14  
15  
16  
17  
18  
19

20 Our findings indicate that there is a multitude of tasks involved in everyday work in the OR. The  
21 observations also show that the impact of interruptions and multitasking can both sustain and disrupt  
22 safe care. This supports the notion that attempts should not be made to control complexity; rather it  
23 should be embraced and applied as a clarifying lens through which to understand today's healthcare  
24 organizations.<sup>5</sup> As multitasking is expected in the OR context, controlling variation and adding more  
25 barriers to the work process may instead result in even further increases to complexity. Multitasking  
26 and interrupting other team members should be accepted and done when necessary, with awareness  
27 of patient safety. The surgical team's ability to overcome and compensate for shortcomings and to  
28 adapt to variations and demands needs to be further explored. Strategies used by professionals when  
29 successfully navigating through and recovering from unexpected events and interruptions that occur  
30 in a CAS should be studied to support resilient performance.<sup>13</sup>  
31  
32  
33  
34  
35  
36  
37  
38  
39

### 40 **Strengths and limitations**

41 This study adds to the knowledge of how complex work is performed in the OR by providing a  
42 multidimensional view of the complete pre- and intraoperative work process of the surgical team. In  
43 order to produce an interprofessional view of the teamwork in the OR, the observations included three  
44 key professions: ORNs, RNAs and surgeons. However, the total observation time was somewhat lower  
45 for surgeons, as the time for observations of preparation before the surgical procedures did not include  
46 surgeons. The data collection tool used, WOMBAT, employs a structured observation protocol with an  
47 operationalized definition of "interruption", which may reduce the risk of potential measurement  
48 errors. Unlike previous WOMBAT studies reporting interrupted tasks and initiated tasks after the  
49 interruption, we include a report on the observable causes of interruptions (Why) with examples.  
50 Another strength is that both observers were experienced RNAs and one of the researchers also had  
51 experience as an ORN. However, in order to avoid bias, the observations were conducted at a hospital  
52 where the researchers had not previously worked.  
53  
54  
55  
56  
57  
58  
59  
60

1  
2  
3 Surgical teams in Sweden usually consist of a RNA, an anesthesiologist, an operating and assistant  
4 surgeon, an ORN and a circulating nurse. Though the assistant surgeon, anesthesiologist and the  
5 circulating nurse were observed indirectly when interacting with the observed ORN, RNA or surgeon,  
6 the nature of their performed tasks and how often they were interrupted were not recorded. This may  
7 be considered a limitation, as the whole surgical team is not represented in this study. Regulations  
8 concerning the number of people in the room and the risk of healthcare-associated infections in  
9 orthopedic implant surgery<sup>47</sup> contributed to exclusion of these procedures, which could be taken into  
10 consideration when interpreting the results. Some participants were also observed on several  
11 occasions, which may imply a potential risk for a systematic bias. This study was performed at one  
12 hospital only and did not include night shifts, weekend shifts, or procedures conducted on Fridays. This  
13 may limit the representativeness for different work shifts and may reduce the generalizability of the  
14 findings.  
15  
16  
17  
18  
19  
20  
21  
22  
23  
24  
25

## 26 **Conclusions**

27  
28 Work in the OR consists of many tasks performed by multiple professionals, with the probability of a  
29 high degree of interrelatedness. The OR may therefore be considered a CAS. In order to accomplish  
30 tasks, meet goals, and develop and deliver safe care for patients, professionals share information and  
31 coordinate their work through communication. This seems to be a factor contributing to success during  
32 surgical procedures, as it may support the safe management of complexity. Interruptions were  
33 commonly followed by professional communication, which may reflect the interactions and constant  
34 adaptations in a CAS. The impact of multitasking and interruptions on the work processes can be  
35 positive, negative or neutral. This contributes to difficulties in drawing conclusions on simple solutions.  
36 Instead of studying tasks, multitasking and interruptions separately, it may be beneficial to study these  
37 phenomena from a team perspective and as a complex process, in order to fully understand clinical  
38 work. Future patient safety research should focus on understanding the complexity within the system,  
39 the design of different work processes, and how teams meet the challenges within a CAS.  
40  
41  
42  
43  
44  
45  
46  
47  
48  
49  
50  
51  
52  
53  
54  
55  
56  
57  
58  
59  
60



### Contributorship statement

CG, MU, UN, AE and ME contributed to the study design. CG was the project supervisor and performed the initial exploratory observations. CG and KO were responsible for identification and definitions of categories, as well as data collection and drafting the manuscript. They also undertook the initial interpretation and statistical analysis of the data, which was followed by discussions with MU, UN, KPH, AE and ME. The CI, IRR and ICC were calculated by MKT. Drafts of the manuscript were reviewed by MU, KPH, AE, MKT, UN and ME. All authors have read and approved the final manuscript.

### Competing interests

The authors report no conflict of interest. The authors alone are responsible for the content and the writing of this paper.

### Funding

This work was funded by The Center for Clinical Research Dalarna and by Finnish state funding for university-level health research. The funders have neither been involved in any part of the study, nor in writing the manuscript or the decision to submit the manuscript for publication.

### Data sharing statement

No additional data are available.

### Acknowledgements

We want to thank Ville Pöntinen for statistical support. We also thank the heads of participating departments and the surgical teams for their willingness to participate in this study.

### Provenance and peer review

Not commissioned; externally peer reviewed.

## REFERENCES

1. Potter P, Wolf L, Boxerman S, et al. Understanding the cognitive work of nursing in the acute care environment. *The Journal of nursing administration* 2005;35(7-8):327-35. [published Online First: 2005/08/04]
2. Skaugset LM, Farrell S, Carney M, et al. Can You Multitask? Evidence and Limitations of Task Switching and Multitasking in Emergency Medicine. *Annals of emergency medicine* 2016;68(2):189-95. doi: 10.1016/j.annemergmed.2015.10.003 [published Online First: 2015/11/21]
3. Nemeth C, O'Connor M, Klock PA, et al. Advances in Patient Safety Cognitive Artifacts' Implications for Health Care Information Technology: Revealing How Practitioners Create and Share Their Understanding of Daily Work. In: Henriksen K, Battles JB, Marks ES, et al., eds. *Advances in Patient Safety: From Research to Implementation (Volume 2: Concepts and Methodology)*. Rockville (MD): Agency for Healthcare Research and Quality (US) 2005.
4. Tsai MH, Sanford JA, Black IH, et al. Operating Room Management at the Edge of Order and Chaos. *The Journal of medical practice management : MPM* 2017;32(4):250-55. [published Online First: 2017/01/01]
5. Braithwaite J, Churrua, K, Ellis, L, Long, J, Clay-Williams, R, Damen, N, Herkes, J, Pomare, C & Ludlow, K. *Complexity Science in Healthcare - Aspirations, Approaches, Applications and Accomplishments: A White Paper*, 2017.
6. Antoniadis S, Passauer-Baierl S, Baschnegger H, et al. Identification and interference of intraoperative distractions and interruptions in operating rooms. *The Journal of surgical research* 2014;188(1):21-9. doi: 10.1016/j.jss.2013.12.002 [published Online First: 2014/01/11]
7. Pype P, Krystallidou D, Deveugele M, et al. Healthcare teams as complex adaptive systems: Focus on interpersonal interaction. *Patient Education and Counseling* 2017;100(11):2028-34. doi: <https://doi.org/10.1016/j.pec.2017.06.029>
8. Catchpole K, Wiegmann D. Understanding safety and performance in the cardiac operating room: from 'sharp end' to 'blunt end'. *BMJ quality & safety* 2012;21(10):807-9. doi: 10.1136/bmjqs-2012-001135 [published Online First: 2012/09/28]
9. den Boer KT, Dankelman J, Gouma DJ, et al. Peroperative analysis of the surgical procedure. *Surgical Endoscopy And Other Interventional Techniques* 2002;16(3):492-99. doi: 10.1007/s00464-001-8216-5
10. Blikkendaal MD, Driessen SR, Rodrigues SP, et al. Surgical flow disturbances in dedicated minimally invasive surgery suites: an observational study to assess its supposed superiority over conventional suites. *Surgical endoscopy* 2017;31(1):288-98. doi: 10.1007/s00464-016-4971-1 [published Online First: 2016/05/21]
11. Healey AN, Sevdalis N, Vincent CA. Measuring intra-operative interference from distraction and interruption observed in the operating theatre. *Ergonomics* 2006;49(5-6):589-604. doi: 10.1080/00140130600568899 [published Online First: 2006/05/24]
12. Wears RL, Hollnagel E, Braithwaite J. *Resilient health care. Volume 2, The resilience of everyday clinical work*. Farnham, Surrey: Ashgate 2015.
13. Hollnagel E, Woods, D. & Leveson, N. *Resilience engineering: concepts and precepts*. : Aldershot: Ashgate Publishing. 2006.

14. Braithwaite J, Wears RL, Hollnagel E. Resilient health care: turning patient safety on its head. *International journal for quality in health care : journal of the International Society for Quality in Health Care* 2015;27(5):418-20. doi: 10.1093/intqhc/mzv063 [published Online First: 2015/08/22]
15. Chisholm CD, Collison EK, Nelson DR, et al. Emergency department workplace interruptions: are emergency physicians "interrupt-driven" and "multitasking"? *Acad Emerg Med* 2000;7(11):1239-43. [published Online First: 2000/11/10]
16. Douglas HE, Raban MZ, Walter SR, et al. Improving our understanding of multi-tasking in healthcare: Drawing together the cognitive psychology and healthcare literature. *Applied ergonomics* 2017;59(Part A):45-55. doi: <https://doi.org/10.1016/j.apergo.2016.08.021>
17. Laxmisan A, Hakimzada F, Sayan OR, et al. The multitasking clinician: Decision-making and cognitive demand during and after team handoffs in emergency care. *International Journal of Medical Informatics* 2007;76(11-12):801-11. doi: <http://dx.doi.org/10.1016/j.ijmedinf.2006.09.019>
18. Weigl M, Müller A, Zupanc A, et al. Participant observation of time allocation, direct patient contact and simultaneous activities in hospital physicians. *BMC Health Services Research* 2009;9(1):110. doi: 10.1186/1472-6963-9-110
19. Colligan L, Bass EJ. Interruption handling strategies during paediatric medication administration. *BMJ quality & safety* 2012;21(11):912-7. doi: 10.1136/bmjqs-2011-000292 [published Online First: 2012/07/14]
20. Berg LM, Ehrenberg A, Florin J, et al. An observational study of activities and multitasking performed by clinicians in two Swedish emergency departments. *Eur J Emerg Med* 2012;19(4):246-51. doi: 10.1097/MEJ.0b013e32834c314a [published Online First: 2011/09/22]
21. Forsberg HH, Muntlin Athlin A, von Thiele Schwarz U. Nurses' perceptions of multitasking in the emergency department: effective, fun and unproblematic (at least for me) - a qualitative study. *Int Emerg Nurs* 2015;23(2):59-64. doi: 10.1016/j.ienj.2014.05.002 [published Online First: 2014/06/24]
22. Weigl M, Muller A, Sevdalis N, et al. Relationships of multitasking, physicians' strain, and performance: an observational study in ward physicians. *Journal of patient safety* 2013;9(1):18-23. doi: 10.1097/PTS.0b013e31826b7b87 [published Online First: 2012/09/26]
23. Westbrook JI, Raban MZ, Walter SR, et al. Task errors by emergency physicians are associated with interruptions, multitasking, fatigue and working memory capacity: a prospective, direct observation study. *BMJ Quality & Safety* 2018;27(8):655-63. doi: 10.1136/bmjqs-2017-007333
24. Kalisch BJ, Aebersold M. Interruptions and Multitasking in Nursing Care. *The Joint Commission Journal on Quality and Patient Safety* 2010;36(3):126-32. doi: [https://doi.org/10.1016/S1553-7250\(10\)36021-1](https://doi.org/10.1016/S1553-7250(10)36021-1)
25. Murji A, Luketic L, Sobel ML, et al. Evaluating the effect of distractions in the operating room on clinical decision-making and patient safety. *Surgical endoscopy* 2016;30(10):4499-504. doi: 10.1007/s00464-016-4782-4 [published Online First: 2016/02/21]
26. Li L, Hains I, Hordern T, et al. What do ICU doctors do? A multisite time and motion study of the clinical work patterns of registrars. *Crit Care Resusc* 2015;17(3):159-66. [published Online First: 2015/08/19]
27. Walter SR, Li L, Dunsmuir WT, et al. Managing competing demands through task-switching and multitasking: a multi-setting observational study of 200 clinicians

- over 1000 hours. *BMJ quality & safety* 2014;23(3):231-41. doi: 10.1136/bmjqs-2013-002097 [published Online First: 2013/10/19]
28. Bellandi T, Cerri A, Carreras G, et al. Interruptions and multitasking in surgery: a multicentre observational study of the daily work patterns of doctors and nurses. *Ergonomics* 2017;1-8. doi: 10.1080/00140139.2017.1349934 [published Online First: 2017/07/13]
29. Werner NE, Holden RJ. Interruptions in the wild: Development of a sociotechnical systems model of interruptions in the emergency department through a systematic review. *Applied ergonomics* 2015;51:244-54. doi: 10.1016/j.apergo.2015.05.010 [published Online First: 2015/07/15]
30. Boehm-Davis DA, Remington R. Reducing the disruptive effects of interruption: a cognitive framework for analysing the costs and benefits of intervention strategies. *Accid Anal Prev* 2009;41(5):1124-9. doi: 10.1016/j.aap.2009.06.029 [published Online First: 2009/08/12]
31. Campbell G, Arfanis K, Smith AF. Distraction and interruption in anaesthetic practice. *British journal of anaesthesia* 2012;109(5):707-15. doi: 10.1093/bja/aes219 [published Online First: 2012/07/04]
32. Westbrook JI, Coiera E, Dunsmuir WT, et al. The impact of interruptions on clinical task completion. *Quality & safety in health care* 2010;19(4):284-9. doi: 10.1136/qshc.2009.039255 [published Online First: 2010/05/14]
33. Potter P, Boxerman S, Wolf L, et al. Mapping the nursing process: a new approach for understanding the work of nursing. *The Journal of nursing administration* 2004;34(2):101-9. [published Online First: 2004/02/11]
34. Cook RI, Render M, Woods DD. Gaps in the continuity of care and progress on patient safety. *BMJ : British Medical Journal* 2000;320(7237):791-94.
35. Raban MZ, Westbrook JI. Are interventions to reduce interruptions and errors during medication administration effective?: a systematic review. *BMJ quality & safety* 2014;23(5):414-21. doi: 10.1136/bmjqs-2013-002118 [published Online First: 2013/08/28]
36. Yoong W, Khin A, Ramlal N, et al. Interruptions and distractions in the gynaecological operating theatre: irritating or dangerous? *Ergonomics* 2015;58(8):1314-9. doi: 10.1080/00140139.2015.1005171 [published Online First: 2015/02/13]
37. Zheng B, Martinec DV, Cassera MA, et al. A quantitative study of disruption in the operating room during laparoscopic antireflux surgery. *Surgical endoscopy* 2008;22(10):2171-7. doi: 10.1007/s00464-008-0017-7 [published Online First: 2008/07/16]
38. Cohen TN, Cabrera JS, Sisk OD, et al. Identifying workflow disruptions in the cardiovascular operating room. *Anaesthesia* 2016;71(8):948-54. doi: 10.1111/anae.13521 [published Online First: 2016/07/12]
39. Sasangohar F, Donmez B, Trbovich P, et al. Not All Interruptions are Created Equal: Positive Interruptions in Healthcare. *Proceedings of the Human Factors and Ergonomics Society Annual Meeting* 2012;56(1):824-28. doi: 10.1177/1071181312561172
40. Walter SR, Raban MZ, Dunsmuir WTM, et al. Emergency doctors' strategies to manage competing workload demands in an interruptive environment: An observational workflow time study. *Applied ergonomics* 2017;58:454-60. doi: 10.1016/j.apergo.2016.07.020 [published Online First: 2016/09/17]
41. Berg LM, Kallberg AS, Ehrenberg A, et al. Factors influencing clinicians' perceptions of interruptions as disturbing or non-disturbing: A qualitative study. *Int Emerg*

- 1  
2  
3                    *Nurs* 2016;27:11-6. doi: 10.1016/j.ienj.2016.01.003 [published Online First:  
4                    2016/03/08]
- 5  
6 42. Alvarez G, Coiera E. Interruptive communication patterns in the intensive care unit  
7                    ward round. *Int J Med Inform* 2005;74(10):791-6. doi:  
8                    10.1016/j.ijmedinf.2005.03.017 [published Online First: 2005/07/19]
- 9  
10 43. Woloshynowych M, Davis R, Brown R, et al. Communication patterns in a UK  
11                    emergency department. *Annals of emergency medicine* 2007;50(4):407-13. doi:  
12                    10.1016/j.annemergmed.2007.08.001 [published Online First: 2007/09/21]
- 13  
14 44. Gillespie BM, Chaboyer W, Fairweather N. Interruptions and miscommunications in  
15                    surgery: an observational study. *Aorn j* 2012;95(5):576-90. doi:  
16                    10.1016/j.aorn.2012.02.012 [published Online First: 2012/05/01]
- 17  
18 45. Persoon MC, Broos HJHP, Witjes JA, et al. The effect of distractions in the operating  
19                    room during endourological procedures. *Surgical endoscopy* 2011;25(2):437-43.  
20                    doi: 10.1007/s00464-010-1186-8
- 21  
22 46. Nilsson U, Jaensson M. Anesthetic Nursing: Keep in Touch, Watch Over, and Be One  
23                    Step Ahead. *Journal of perianesthesia nursing : official journal of the American*  
24                    *Society of PeriAnesthesia Nurses* 2016;31(6):550-51. doi:  
25                    10.1016/j.jopan.2016.09.005 [published Online First: 2016/12/10]
- 26  
27 47. Andersson AE, Bergh I, Karlsson J, et al. Traffic flow in the operating room: an  
28                    explorative and descriptive study on air quality during orthopedic trauma  
29                    implant surgery. *Am J Infect Control* 2012;40(8):750-5. doi:  
30                    10.1016/j.ajic.2011.09.015 [published Online First: 2012/01/31]
- 31  
32 48. Westbrook JI, Ampt A. Design, application and testing of the Work Observation  
33                    Method by Activity Timing (WOMBAT) to measure clinicians' patterns of work  
34                    and communication. *Int J Med Inform* 2009;78 Suppl 1:S25-33. doi:  
35                    10.1016/j.ijmedinf.2008.09.003 [published Online First: 2008/10/28]
- 36  
37 49. Grundgeiger T, Dekker S, Sanderson P, et al. Obstacles to research on the effects of  
38                    interruptions in healthcare. *BMJ quality & safety* 2016;25(6):392-5. doi:  
39                    10.1136/bmjqs-2015-004083 [published Online First: 2015/12/15]
- 40  
41 50. Palmer G, 2nd, Abernathy JH, 3rd, Swinton G, et al. Realizing improved patient care  
42                    through human-centered operating room design: a human factors methodology  
43                    for observing flow disruptions in the cardiothoracic operating room.  
44                    *Anesthesiology* 2013;119(5):1066-77. doi: 10.1097/ALN.0b013e31829f68cf  
45                    [published Online First: 2013/07/03]
- 46  
47 51. Trafton JG, Altmann EM, Brock DP, et al. Preparing to resume an interrupted task:  
48                    effects of prospective goal encoding and retrospective rehearsal. *International*  
49                    *Journal of Human-Computer Studies* 2003;58(5):583-603. doi:  
50                    https://doi.org/10.1016/S1071-5819(03)00023-5
- 51  
52 52. CHSSR. Work Observation Method By Activity Timing. A guide to the installation and  
53                    use of WOMBAT V2.0. . Kensington, NSW: The University of New South Wales  
54                    Australian Institute of Health Innovation, Faculty of Medicine, 2012.
- 55  
56 53. Landis JR, Koch GG. The measurement of observer agreement for categorical data.  
57                    *Biometrics* 1977;33(1):159-74. [published Online First: 1977/03/01]
- 58  
59 54. McDonald S. Studying actions in context: a qualitative shadowing method for  
60                    organizational research. *Qualitative Research* 2005;5(4):455-73. doi:  
                    10.1177/1468794105056923
55. Walter S, Li, L., Westbrook, JI. A Guide to the Analysis of Data from the Work  
Observation Method By Activity Timing (WOMBAT) System. Sydney: Australia:  
Australian Institute of Health Innovation, Macquarie University, 2018.

- 1  
2  
3 56. Lehnбом EC, Li L, Prgomet M, et al. Little Things Matter: A Time and Motion Study of  
4 Pharmacists' Activities in a Paediatric Hospital. *Stud Health Technol Inform*  
5 2016;227:80-6. [published Online First: 2016/07/22]  
6  
7 57. Brown LD, Cai TT, DasGupta A. Interval Estimation for a Binomial Proportion.  
8 *Statistical Science* 2001;16(2):101-17.  
9  
10 58. Larcos G, Prgomet M, Georgiou A, et al. A work observation study of nuclear medicine  
11 technologists: interruptions, resilience and implications for patient safety. *BMJ*  
12 *quality & safety* 2016 doi: 10.1136/bmjqs-2016-005846 [published Online First:  
13 2016/10/22]  
14  
15 59. Richardson LC, Lehnбом EC, Baysari MT, et al. A time and motion study of junior  
16 doctor work patterns on the weekend: a potential contributor to the weekend  
17 effect? *Intern Med J* 2016;46(7):819-25. doi: 10.1111/imj.13120 [published  
18 Online First: 2016/04/21]  
19  
20 60. Westbrook JI, Duffield C, Li L, et al. How much time do nurses have for patients? A  
21 longitudinal study quantifying hospital nurses' patterns of task time distribution  
22 and interactions with health professionals. *BMC Health Serv Res* 2011;11:319. doi:  
23 10.1186/1472-6963-11-319 [published Online First: 2011/11/25]  
24  
25 61. Bogdanovic J, Perry J, Guggenheim M, et al. Adaptive coordination in surgical teams:  
26 an interview study. *BMC Health Services Research* 2015;15:128. doi:  
27 10.1186/s12913-015-0792-5  
28  
29 62. Gillespie BM, Gwinner K, Chaboyer W, et al. Team communications in surgery -  
30 creating a culture of safety. *J Interprof Care* 2013;27(5):387-93. doi:  
31 10.3109/13561820.2013.784243  
32  
33 63. Gillespie BM, Gwinner K, Fairweather N, et al. Building shared situational awareness  
34 in surgery through distributed dialog. *Journal of multidisciplinary healthcare*  
35 2013;6:109-18. doi: 10.2147/jmdh.s40710 [published Online First: 2013/05/11]  
36  
37 64. Weigl M, Antoniadis S, Chiapponi C, et al. The impact of intra-operative interruptions  
38 on surgeons' perceived workload: an observational study in elective general and  
39 orthopedic surgery. *Surgical endoscopy* 2015;29(1):145-53. doi:  
40 10.1007/s00464-014-3668-6 [published Online First: 2014/07/06]  
41  
42 65. Sasangohar F, Donmez B, Easty A, et al. Interruptions experienced by cardiovascular  
43 intensive care unit nurses: an observational study. *Journal of critical care*  
44 2014;29(5):848-53. doi: 10.1016/j.jcrc.2014.05.007 [published Online First:  
45 2014/06/30]  
46  
47 66. Ballermann MA, Shaw NT, Mayes DC, et al. Validation of the Work Observation  
48 Method By Activity Timing (WOMBAT) method of conducting time-motion  
49 observations in critical care settings: an observational study. *BMC Medical*  
50 *Informatics and Decision Making* 2011;11:32-32. doi: 10.1186/1472-6947-11-32  
51  
52 67. Westbrook JI. Interruptions and multi-tasking: moving the research agenda in new  
53 directions. *BMJ quality & safety* 2014;23(11):877-9. doi: 10.1136/bmjqs-2014-  
54 003372 [published Online First: 2014/07/20]  
55

## 56 Figure Legends

57 **Figure 1.** Distribution of the proportion of the observed time\* participants spent performing tasks in a particular category

58 \*Total observation time per profession was 66 hours each for ORNs and RNAs, whereas surgeons were observed for 37 hours  
59  
60

1  
2  
3  
4  
5  
6  
7  
8  
9  
10  
11  
12  
13  
14  
15  
16  
17  
18  
19  
20  
21  
22  
23  
24  
25  
26  
27  
28  
29  
30  
31  
32  
33  
34  
35  
36  
37  
38  
39  
40  
41  
42  
43  
44  
45  
46  
47  
48  
49  
50  
51  
52  
53  
54  
55  
56  
57  
58  
59  
60



Figure 1. Distribution of the proportion of the observed time\* participants spent performing tasks in a particular category  
 \*Total observation time per profession was 66 hours each for ORNs and RNAs, whereas surgeons were observed for 37 hours

94x57mm (300 x 300 DPI)

**STROBE 2007 (v4) Statement—Checklist of items that should be included in reports of *cross-sectional studies*.**

| Section/Topic                | Item # | Recommendation                                                                                                                                                                       | Reported on page #                         |
|------------------------------|--------|--------------------------------------------------------------------------------------------------------------------------------------------------------------------------------------|--------------------------------------------|
| <b>Title and abstract</b>    | 1      | (a) Indicate the study's design with a commonly used term in the title or the abstract                                                                                               | #1                                         |
|                              |        | (b) Provide in the abstract an informative and balanced summary of what was done and what was found                                                                                  | #2                                         |
| <b>Introduction</b>          |        |                                                                                                                                                                                      |                                            |
| Background/rationale         | 2      | Explain the scientific background and rationale for the investigation being reported                                                                                                 | #4 - #6                                    |
| Objectives                   | 3      | State specific objectives, including any prespecified hypotheses                                                                                                                     | #5 - #6                                    |
| <b>Methods</b>               |        |                                                                                                                                                                                      |                                            |
| Study design                 | 4      | Present key elements of study design early in the paper                                                                                                                              | #6                                         |
| Setting                      | 5      | Describe the setting, locations, and relevant dates, including periods of recruitment, exposure, follow-up, and data collection                                                      | #6 - #9                                    |
| Participants                 | 6      | (a) Give the eligibility criteria, and the sources and methods of selection of participants                                                                                          | #9                                         |
| Variables                    | 7      | Clearly define all outcomes, exposures, predictors, potential confounders, and effect modifiers. Give diagnostic criteria, if applicable                                             | #5-#6, not fully applicable for this study |
| Data sources/<br>measurement | 8*     | For each variable of interest, give sources of data and details of methods of assessment (measurement). Describe comparability of assessment methods if there is more than one group | #6-#7, not fully applicable for this study |
| Bias                         | 9      | Describe any efforts to address potential sources of bias                                                                                                                            | #17                                        |
| Study size                   | 10     | Explain how the study size was arrived at                                                                                                                                            | #6                                         |
| Quantitative variables       | 11     | Explain how quantitative variables were handled in the analyses. If applicable, describe which groupings were chosen and why                                                         | #10                                        |
| Statistical methods          | 12     | (a) Describe all statistical methods, including those used to control for confounding                                                                                                | #10                                        |
|                              |        | (b) Describe any methods used to examine subgroups and interactions                                                                                                                  | Not applicable for this study              |



|                   |     |                                                                                                                                                                                                              |                                                                    |
|-------------------|-----|--------------------------------------------------------------------------------------------------------------------------------------------------------------------------------------------------------------|--------------------------------------------------------------------|
|                   |     | (c) Explain how missing data were addressed                                                                                                                                                                  | Missing data were treated as missing, and not imputed or averaged. |
|                   |     | (d) If applicable, describe analytical methods taking account of sampling strategy                                                                                                                           | Not applicable for this study                                      |
|                   |     | (e) Describe any sensitivity analyses                                                                                                                                                                        | Not applicable for this study                                      |
| <b>Results</b>    |     |                                                                                                                                                                                                              |                                                                    |
| Participants      | 13* | (a) Report numbers of individuals at each stage of study—eg numbers potentially eligible, examined for eligibility, confirmed eligible, included in the study, completing follow-up, and analysed            | #11                                                                |
|                   |     | (b) Give reasons for non-participation at each stage                                                                                                                                                         | #9                                                                 |
|                   |     | (c) Consider use of a flow diagram                                                                                                                                                                           | Not applicable for this study                                      |
| Descriptive data  | 14* | (a) Give characteristics of study participants (eg demographic, clinical, social) and information on exposures and potential confounders                                                                     | #11                                                                |
|                   |     | (b) Indicate number of participants with missing data for each variable of interest                                                                                                                          | Not applicable for this study                                      |
| Outcome data      | 15* | Report numbers of outcome events or summary measures                                                                                                                                                         | #11-#14                                                            |
| Main results      | 16  | (a) Give unadjusted estimates and, if applicable, confounder-adjusted estimates and their precision (eg, 95% confidence interval). Make clear which confounders were adjusted for and why they were included | #10                                                                |
|                   |     | (b) Report category boundaries when continuous variables were categorized                                                                                                                                    | Not applicable for this study                                      |
|                   |     | (c) If relevant, consider translating estimates of relative risk into absolute risk for a meaningful time period                                                                                             | Not applicable for this study                                      |
| Other analyses    | 17  | Report other analyses done—eg analyses of subgroups and interactions, and sensitivity analyses                                                                                                               | Not applicable for this study                                      |
| <b>Discussion</b> |     |                                                                                                                                                                                                              |                                                                    |
| Key results       | 18  | Summarise key results with reference to study objectives                                                                                                                                                     | #15                                                                |
| Limitations       | 19  | Discuss limitations of the study, taking into account sources of potential bias or imprecision. Discuss both direction and magnitude of any potential bias                                                   | #17-#18                                                            |

1  
2  
3  
4  
5  
6  
7  
8  
9  
10  
11  
12  
13  
14  
15  
16  
17  
18  
19  
20  
21  
22  
23  
24  
25  
26  
27  
28  
29  
30  
31  
32  
33  
34  
35  
36  
37  
38  
39  
40  
41  
42  
43  
44  
45  
46

|                  |                          |    |                                                                                                                                                                            |         |
|------------------|--------------------------|----|----------------------------------------------------------------------------------------------------------------------------------------------------------------------------|---------|
| 1<br>2<br>3<br>4 | Interpretation           | 20 | Give a cautious overall interpretation of results considering objectives, limitations, multiplicity of analyses, results from similar studies, and other relevant evidence | #17-#18 |
| 5<br>6           | Generalisability         | 21 | Discuss the generalisability (external validity) of the study results                                                                                                      | #18     |
| 7                | <b>Other information</b> |    |                                                                                                                                                                            |         |
| 8<br>9           | Funding                  | 22 | Give the source of funding and the role of the funders for the present study and, if applicable, for the original study on which the present article is based              | #19     |

10  
11 \*Give information separately for cases and controls in case-control studies and, if applicable, for exposed and unexposed groups in cohort and cross-sectional studies.

12  
13  
14 **Note:** An Explanation and Elaboration article discusses each checklist item and gives methodological background and published examples of transparent reporting. The STROBE  
15 checklist is best used in conjunction with this article (freely available on the Web sites of PLoS Medicine at <http://www.plosmedicine.org/>, Annals of Internal Medicine at  
16 <http://www.annals.org/>, and Epidemiology at <http://www.epidem.com/>). Information on the STROBE Initiative is available at [www.strobe-statement.org](http://www.strobe-statement.org).  
17  
18  
19  
20  
21  
22  
23  
24  
25  
26  
27  
28  
29  
30  
31  
32  
33  
34  
35  
36  
37  
38  
39  
40  
41  
42  
43  
44  
45  
46
